# Supplementary material
Source: MDPI journal article supplement (https://www.mdpi.com/1999-4907/9/10/618)
Supplement: s1 [file s1]

## Sheet: Paper Summaries
														Climate Change					LCA parameters or other pertinent data discussed
	First Author	Publication Title	Year	Paper Objective_Short	Paper Objective	Management View?	Key uncertainties	Geography	Study Era (Age of Data)	Was this an LCA?	LCA Type	Carbon pools analyzed_Short	Carbon pools analyzed Notes	Water	Wildfire	Biodiversity	Natural Disaster	Disease Outbreak	Control Scenario	Study Scenario(s)_Short	Wood product uses	Long Lived LifeSpan (years)	LifeSpans (years)	Mill efficiency	Substituiton_Short	Substitution Notes	Leakage	Inputs	Harvest Rotation Cycle	Extending harvest rotations view_Short	Extending Harvest Rotations Notes	Life cycle timeframe	Restoration technique incorporated	Climate Change	End of Life Assumptions	Assumptions	Results	Carbon store recovered from harvesting (%)	Carbon store recovered from harvesting METRIC	Biomass for Energy Notes	Forest/Mill Residuals Notes	Ecosystem Services Notes	Forest carbon stores Notes	Carbon storage or management comments	Other Notes	Questions
1	Harmon	Modeled Carbon Stores in Oregon’s Wood Products: 1900-2016	2018 (draft)	Harvest carbon store modeling	1. The following report describes one process to model store in harvest-related carbon and the changes in these pools over time and presents the results from simulations using Oregon-based data. The analysis considers harvests between 1900 and 2016 to estimate the net change in harvest-related stores for the last decade. The losses from later carbon pools depend on the accumulation in the previou…	Other/Unsure	1. Life-span of carbon disposed into landfills 2. The greatest uncertainty involves the lifespan of long-term structures such as buildings	Oregon	1900-2016 Data Sources: The data used in these calculations were taken from Harmon et al (1996) model and updated using USFS reports on the forest products industry and harvest to fill in values for the post 1992 period (Ward 1997, Brandt et al 2003, Gale et al 2012, and Simmonds et al. 2016). Harvests after 1942 from different ownerships was based on ODF reports. Prior to 1942 it was assumed tha…	No	N/A	harvested stem / C stored in wood products	1. The model tracks the flows of harvested stem carbon into different manufacturing streams, flows into different uses, flows into different forms of disposal (including recycling), and the flows out of various forms of disposal. In addition, it tracks the flows leaving products being used to the atmosphere via combustion and decomposition.	N/A	N/A	N/A	N/A	N/A	N/A	Landfill LifeSpan Assumption 200avg/920max; Long-lived 50	Mulch, paper, lumber (from saw logs) used in short and long-term structures, plywood (from veneer logs) used in short and long-term structures, waste (to be incinerated or combusted for energy); Over the 1900 to 2016 period 673 Tg C of harvested wood has been allocated to saw logs (71.7%), 189.9 Tg C to veneer logs, (20.2%), and 76.3 Tg C to pulp logs (8.1%); SEE PROCESS FLOW MAP CREATED	50 average; 230 max	Mulch (10 avg., 46 max); paper (7 avg.; 30 max); short term structures (7 avg.; 31 max); long term structures (50 avg.; 230 max); products that end up in landfill (avg. 200; 920 max); products that end up in open dumps (3 avg.; 14 max); SEE PROCESS FLOW MAP CREATED	N/A	1. Carbon offsets via energy substitution; The fraction of total carbon emissions from manufacturing, use, and disposal of forest harvested carbon “offset” by energy substitution is low, ranging between 4 to 12%.	1. Mulch: Over the 1900 to 2016 period a total of 111.8 Tg C has been either been incinerated or used as fuel and 16 Tg C has been used as mulch. If one assumes that since 1975 all the latter flow (mulch?) has involved energy capture then a total of 38.6 Tg C might be offset to some degree by energy substitution. 2. Lumber: Over the 1900 to 2016 period a total of 327.8 Tg C of lumber has been pro…	N/A	N/A	1. The amount of stem C harvested was highest in the 1950 to 1980 period (Figure 1). Prior to 1950 the harvest generally increased, although there were declines associated with the Great Depression and other economic downturns. After 1980 the largest decline occurred due to a reduction in harvesting on Federal forest lands. Temporary declines with the recessions in the early 1980’s and 2008 are a…	Mixed, Other	N/A	N/A	N/A	N/A	1. Mulch (decomposition); paper (disposal, decomposition, or combined); short term structures (disposal or decomposition/combustion); long term structures (disposal or decomposition/combustion) 2. Paper end of life assumptions is 50% energy generation and 50% decomposition in sludge pools 3. Saw log waste was mostly incinerated prior to 1970, and primarily used in energy generation for hog fuel a…	N/A	N/A	0.232	RETENTION: Accumulated store to the cumulative harvest over time (across all ownerships from 1900-2016); how much of the harvested carbon is retained?	N/A	N/A	N/A	N/A	N/A	1. To get a rough sense of how much of the harvested carbon is retained one can compare the accumulated store to the cumulative harvest over time (Figure 17); An important metric to help estimate the net accumulation of carbon in solid wood products in-use and disposed is the ratio of the net change in stores to harvest (NCS to H ratio). In effect this allows one to estimate the net change in sto…	1. Does model account for extraction of the raw materials (harvested stem) for the wood products? (Manufacturing, In Use, and Disposal included)
1	Harmon	Modeled Carbon Stores in Oregon’s Wood Products: 1900-2016	2018 (draft)	Harvest carbon store modeling	1. The following report describes one process to model store in harvest-related carbon and the changes in these pools over time and presents the results from simulations using Oregon-based data. The analysis considers harvests between 1900 and 2016 to estimate the net change in harvest-related stores for the last decade. The losses from later carbon pools depend on the accumulation in the previou…	Other/Unsure	1. Life-span of carbon disposed into landfills 2. The greatest uncertainty involves the lifespan of long-term structures such as buildings	Oregon	1900-2016 Data Sources: The data used in these calculations were taken from Harmon et al (1996) model and updated using USFS reports on the forest products industry and harvest to fill in values for the post 1992 period (Ward 1997, Brandt et al 2003, Gale et al 2012, and Simmonds et al. 2016). Harvests after 1942 from different ownerships was based on ODF reports. Prior to 1942 it was assumed tha…	No	N/A	harvested stem / C stored in wood products	1. The model tracks the flows of harvested stem carbon into different manufacturing streams, flows into different uses, flows into different forms of disposal (including recycling), and the flows out of various forms of disposal. In addition, it tracks the flows leaving products being used to the atmosphere via combustion and decomposition.	N/A	N/A	N/A	N/A	N/A	N/A	Landfill LifeSpan Assumption 200avg/920max; Long-lived 50	Mulch, paper, lumber (from saw logs) used in short and long-term structures, plywood (from veneer logs) used in short and long-term structures, waste (to be incinerated or combusted for energy); Over the 1900 to 2016 period 673 Tg C of harvested wood has been allocated to saw logs (71.7%), 189.9 Tg C to veneer logs, (20.2%), and 76.3 Tg C to pulp logs (8.1%); SEE PROCESS FLOW MAP CREATED	50 average; 230 max	Mulch (10 avg., 46 max); paper (7 avg.; 30 max); short term structures (7 avg.; 31 max); long term structures (50 avg.; 230 max); products that end up in landfill (avg. 200; 920 max); products that end up in open dumps (3 avg.; 14 max); SEE PROCESS FLOW MAP CREATED	N/A	1. Carbon offsets via energy substitution; The fraction of total carbon emissions from manufacturing, use, and disposal of forest harvested carbon “offset” by energy substitution is low, ranging between 4 to 12%.	1. Mulch: Over the 1900 to 2016 period a total of 111.8 Tg C has been either been incinerated or used as fuel and 16 Tg C has been used as mulch. If one assumes that since 1975 all the latter flow (mulch?) has involved energy capture then a total of 38.6 Tg C might be offset to some degree by energy substitution. 2. Lumber: Over the 1900 to 2016 period a total of 327.8 Tg C of lumber has been pro…	N/A	N/A	1. The amount of stem C harvested was highest in the 1950 to 1980 period (Figure 1). Prior to 1950 the harvest generally increased, although there were declines associated with the Great Depression and other economic downturns. After 1980 the largest decline occurred due to a reduction in harvesting on Federal forest lands. Temporary declines with the recessions in the early 1980’s and 2008 are a…	Mixed, Other	N/A	N/A	N/A	N/A	1. Mulch (decomposition); paper (disposal, decomposition, or combined); short term structures (disposal or decomposition/combustion); long term structures (disposal or decomposition/combustion) 2. Paper end of life assumptions is 50% energy generation and 50% decomposition in sludge pools 3. Saw log waste was mostly incinerated prior to 1970, and primarily used in energy generation for hog fuel a…	N/A	N/A	0.139	NET ACCUMULATION: Ratio of the net change in stores to harvest (NCS to H ratio (across all ownerships from 2003-2013; timeframe overlaps the FIA inventory estimates of harvest and ecosystem stores); what is the estimated net accumulation of carbon in solid wood products in-use and disposed?; the net increase in wood product solid stores is equivalent to 13.9% of the harvest during this period; Fo…	N/A	N/A	N/A	N/A	N/A	1. To get a rough sense of how much of the harvested carbon is retained one can compare the accumulated store to the cumulative harvest over time (Figure 17); An important metric to help estimate the net accumulation of carbon in solid wood products in-use and disposed is the ratio of the net change in stores to harvest (NCS to H ratio). In effect this allows one to estimate the net change in sto…	1. Does model account for extraction of the raw materials (harvested stem) for the wood products? (Manufacturing, In Use, and Disposal included)
1	Harmon	Modeled Carbon Stores in Oregon’s Wood Products: 1900-2016	2018 (draft)	Harvest carbon store modeling	1. The following report describes one process to model store in harvest-related carbon and the changes in these pools over time and presents the results from simulations using Oregon-based data. The analysis considers harvests between 1900 and 2016 to estimate the net change in harvest-related stores for the last decade. The losses from later carbon pools depend on the accumulation in the previou…	Other/Unsure	1. Life-span of carbon disposed into landfills 2. The greatest uncertainty involves the lifespan of long-term structures such as buildings	Oregon	1900-2016 Data Sources: The data used in these calculations were taken from Harmon et al (1996) model and updated using USFS reports on the forest products industry and harvest to fill in values for the post 1992 period (Ward 1997, Brandt et al 2003, Gale et al 2012, and Simmonds et al. 2016). Harvests after 1942 from different ownerships was based on ODF reports. Prior to 1942 it was assumed tha…	No	N/A	harvested stem / C stored in wood products	1. The model tracks the flows of harvested stem carbon into different manufacturing streams, flows into different uses, flows into different forms of disposal (including recycling), and the flows out of various forms of disposal. In addition, it tracks the flows leaving products being used to the atmosphere via combustion and decomposition.	N/A	N/A	N/A	N/A	N/A	N/A	Landfill LifeSpan Assumption 200avg/920max; Long- lived 25	Mulch, paper, lumber (from saw logs) used in short and long-term structures, plywood (from veneer logs) used in short and long-term structures, waste (to be incinerated or combusted for energy); Over the 1900 to 2016 period 673 Tg C of harvested wood has been allocated to saw logs (71.7%), 189.9 Tg C to veneer logs, (20.2%), and 76.3 Tg C to pulp logs (8.1%); SEE PROCESS FLOW MAP CREATED	25 average; 115 max	Mulch (10 avg., 46 max); paper (7 avg.; 30 max); short term structures (7 avg.; 31 max); long term structures (50 avg.; 230 max); products that end up in landfill (avg. 200; 920 max); products that end up in open dumps (3 avg.; 14 max); SEE PROCESS FLOW MAP CREATED	N/A	1. Carbon offsets via energy substitution; The fraction of total carbon emissions from manufacturing, use, and disposal of forest harvested carbon “offset” by energy substitution is low, ranging between 4 to 12%.	1. Mulch: Over the 1900 to 2016 period a total of 111.8 Tg C has been either been incinerated or used as fuel and 16 Tg C has been used as mulch. If one assumes that since 1975 all the latter flow (mulch?) has involved energy capture then a total of 38.6 Tg C might be offset to some degree by energy substitution. 2. Lumber: Over the 1900 to 2016 period a total of 327.8 Tg C of lumber has been pro…	N/A	N/A	1. The amount of stem C harvested was highest in the 1950 to 1980 period (Figure 1). Prior to 1950 the harvest generally increased, although there were declines associated with the Great Depression and other economic downturns. After 1980 the largest decline occurred due to a reduction in harvesting on Federal forest lands. Temporary declines with the recessions in the early 1980’s and 2008 are a…	Mixed, Other	N/A	N/A	N/A	N/A	1. Mulch (decomposition); paper (disposal, decomposition, or combined); short term structures (disposal or decomposition/combustion); long term structures (disposal or decomposition/combustion) 2. Paper end of life assumptions is 50% energy generation and 50% decomposition in sludge pools 3. Saw log waste was mostly incinerated prior to 1970, and primarily used in energy generation for hog fuel a…	N/A	N/A	0.086	NET ACCUMULATION: Ratio of the net change in stores to harvest (NCS to H ratio (across all ownerships from 2003-2013; timeframe overlaps the FIA inventory estimates of harvest and ecosystem stores); what is the estimated net accumulation of carbon in solid wood products in-use and disposed?; For federal, private, and other ownerships this ratio for the same period was -0.854, 0.179, and 0.281 res…	N/A	N/A	N/A	N/A	N/A	1. To get a rough sense of how much of the harvested carbon is retained one can compare the accumulated store to the cumulative harvest over time (Figure 17); An important metric to help estimate the net accumulation of carbon in solid wood products in-use and disposed is the ratio of the net change in stores to harvest (NCS to H ratio). In effect this allows one to estimate the net change in sto…	1. Does model account for extraction of the raw materials (harvested stem) for the wood products? (Manufacturing, In Use, and Disposal included)
1	Harmon	Modeled Carbon Stores in Oregon’s Wood Products: 1900-2016	2018 (draft)	Harvest carbon store modeling	1. The following report describes one process to model store in harvest-related carbon and the changes in these pools over time and presents the results from simulations using Oregon-based data. The analysis considers harvests between 1900 and 2016 to estimate the net change in harvest-related stores for the last decade. The losses from later carbon pools depend on the accumulation in the previou…	Other/Unsure	1. Life-span of carbon disposed into landfills 2. The greatest uncertainty involves the lifespan of long-term structures such as buildings	Oregon	1900-2016 Data Sources: The data used in these calculations were taken from Harmon et al (1996) model and updated using USFS reports on the forest products industry and harvest to fill in values for the post 1992 period (Ward 1997, Brandt et al 2003, Gale et al 2012, and Simmonds et al. 2016). Harvests after 1942 from different ownerships was based on ODF reports. Prior to 1942 it was assumed tha…	No	N/A	harvested stem / C stored in wood products	1. The model tracks the flows of harvested stem carbon into different manufacturing streams, flows into different uses, flows into different forms of disposal (including recycling), and the flows out of various forms of disposal. In addition, it tracks the flows leaving products being used to the atmosphere via combustion and decomposition.	N/A	N/A	N/A	N/A	N/A	N/A	Landfill LifeSpan Assumption 200avg/920max; Long- lived 75	Mulch, paper, lumber (from saw logs) used in short and long-term structures, plywood (from veneer logs) used in short and long-term structures, waste (to be incinerated or combusted for energy); Over the 1900 to 2016 period 673 Tg C of harvested wood has been allocated to saw logs (71.7%), 189.9 Tg C to veneer logs, (20.2%), and 76.3 Tg C to pulp logs (8.1%); SEE PROCESS FLOW MAP CREATED	75 average; 345 max	Mulch (10 avg., 46 max); paper (7 avg.; 30 max); short term structures (7 avg.; 31 max); long term structures (50 avg.; 230 max); products that end up in landfill (avg. 200; 920 max); products that end up in open dumps (3 avg.; 14 max); SEE PROCESS FLOW MAP CREATED	N/A	1. Carbon offsets via energy substitution; The fraction of total carbon emissions from manufacturing, use, and disposal of forest harvested carbon “offset” by energy substitution is low, ranging between 4 to 12%.	1. Mulch: Over the 1900 to 2016 period a total of 111.8 Tg C has been either been incinerated or used as fuel and 16 Tg C has been used as mulch. If one assumes that since 1975 all the latter flow (mulch?) has involved energy capture then a total of 38.6 Tg C might be offset to some degree by energy substitution. 2. Lumber: Over the 1900 to 2016 period a total of 327.8 Tg C of lumber has been pro…	N/A	N/A	1. The amount of stem C harvested was highest in the 1950 to 1980 period (Figure 1). Prior to 1950 the harvest generally increased, although there were declines associated with the Great Depression and other economic downturns. After 1980 the largest decline occurred due to a reduction in harvesting on Federal forest lands. Temporary declines with the recessions in the early 1980’s and 2008 are a…	Mixed, Other	N/A	N/A	N/A	N/A	1. Mulch (decomposition); paper (disposal, decomposition, or combined); short term structures (disposal or decomposition/combustion); long term structures (disposal or decomposition/combustion) 2. Paper end of life assumptions is 50% energy generation and 50% decomposition in sludge pools 3. Saw log waste was mostly incinerated prior to 1970, and primarily used in energy generation for hog fuel a…	N/A	N/A	0.192	NET ACCUMULATION: Ratio of the net change in stores to harvest (NCS to H ratio (across all ownerships from 2003-2013; timeframe overlaps the FIA inventory estimates of harvest and ecosystem stores); what is the estimated net accumulation of carbon in solid wood products in-use and disposed?; For federal, private, and other ownerships this ratio for the same period was -0.467, 0.254, and 0.355 res…	N/A	N/A	N/A	N/A	N/A	1. To get a rough sense of how much of the harvested carbon is retained one can compare the accumulated store to the cumulative harvest over time (Figure 17); An important metric to help estimate the net accumulation of carbon in solid wood products in-use and disposed is the ratio of the net change in stores to harvest (NCS to H ratio). In effect this allows one to estimate the net change in sto…	1. Does model account for extraction of the raw materials (harvested stem) for the wood products? (Manufacturing, In Use, and Disposal included)
1	Harmon	Modeled Carbon Stores in Oregon’s Wood Products: 1900-2016	2018 (draft)	Harvest carbon store modeling	1. The following report describes one process to model store in harvest-related carbon and the changes in these pools over time and presents the results from simulations using Oregon-based data. The analysis considers harvests between 1900 and 2016 to estimate the net change in harvest-related stores for the last decade. The losses from later carbon pools depend on the accumulation in the previou…	Other/Unsure	1. Life-span of carbon disposed into landfills 2. The greatest uncertainty involves the lifespan of long-term structures such as buildings	Oregon	1900-2016 Data Sources: The data used in these calculations were taken from Harmon et al (1996) model and updated using USFS reports on the forest products industry and harvest to fill in values for the post 1992 period (Ward 1997, Brandt et al 2003, Gale et al 2012, and Simmonds et al. 2016). Harvests after 1942 from different ownerships was based on ODF reports. Prior to 1942 it was assumed tha…	No	N/A	harvested stem / C stored in wood products	1. The model tracks the flows of harvested stem carbon into different manufacturing streams, flows into different uses, flows into different forms of disposal (including recycling), and the flows out of various forms of disposal. In addition, it tracks the flows leaving products being used to the atmosphere via combustion and decomposition.	N/A	N/A	N/A	N/A	N/A	N/A	Landfill LifeSpan Assumption 200avg/920max; Long- lived 100	Mulch, paper, lumber (from saw logs) used in short and long-term structures, plywood (from veneer logs) used in short and long-term structures, waste (to be incinerated or combusted for energy); Over the 1900 to 2016 period 673 Tg C of harvested wood has been allocated to saw logs (71.7%), 189.9 Tg C to veneer logs, (20.2%), and 76.3 Tg C to pulp logs (8.1%); SEE PROCESS FLOW MAP CREATED	100 average; 460 max	Mulch (10 avg., 46 max); paper (7 avg.; 30 max); short term structures (7 avg.; 31 max); long term structures (50 avg.; 230 max); products that end up in landfill (avg. 200; 920 max); products that end up in open dumps (3 avg.; 14 max); SEE PROCESS FLOW MAP CREATED	N/A	1. Carbon offsets via energy substitution; The fraction of total carbon emissions from manufacturing, use, and disposal of forest harvested carbon “offset” by energy substitution is low, ranging between 4 to 12%.	1. Mulch: Over the 1900 to 2016 period a total of 111.8 Tg C has been either been incinerated or used as fuel and 16 Tg C has been used as mulch. If one assumes that since 1975 all the latter flow (mulch?) has involved energy capture then a total of 38.6 Tg C might be offset to some degree by energy substitution. 2. Lumber: Over the 1900 to 2016 period a total of 327.8 Tg C of lumber has been pro…	N/A	N/A	1. The amount of stem C harvested was highest in the 1950 to 1980 period (Figure 1). Prior to 1950 the harvest generally increased, although there were declines associated with the Great Depression and other economic downturns. After 1980 the largest decline occurred due to a reduction in harvesting on Federal forest lands. Temporary declines with the recessions in the early 1980’s and 2008 are a…	Mixed, Other	N/A	N/A	N/A	N/A	1. Mulch (decomposition); paper (disposal, decomposition, or combined); short term structures (disposal or decomposition/combustion); long term structures (disposal or decomposition/combustion) 2. Paper end of life assumptions is 50% energy generation and 50% decomposition in sludge pools 3. Saw log waste was mostly incinerated prior to 1970, and primarily used in energy generation for hog fuel a…	N/A	N/A	0.233	NET ACCUMULATION: Ratio of the net change in stores to harvest (NCS to H ratio (across all ownerships from 2003-2013; timeframe overlaps the FIA inventory estimates of harvest and ecosystem stores); what is the estimated net accumulation of carbon in solid wood products in-use and disposed?; For federal, private, and other ownerships this ratio for the same period was -0.238, 0.286, and 0.370 res…	N/A	N/A	N/A	N/A	N/A	1. To get a rough sense of how much of the harvested carbon is retained one can compare the accumulated store to the cumulative harvest over time (Figure 17); An important metric to help estimate the net accumulation of carbon in solid wood products in-use and disposed is the ratio of the net change in stores to harvest (NCS to H ratio). In effect this allows one to estimate the net change in sto…	1. Does model account for extraction of the raw materials (harvested stem) for the wood products? (Manufacturing, In Use, and Disposal included)
1	Harmon	Modeled Carbon Stores in Oregon’s Wood Products: 1900-2016	2018 (draft)	Harvest carbon store modeling	1. The following report describes one process to model store in harvest-related carbon and the changes in these pools over time and presents the results from simulations using Oregon-based data. The analysis considers harvests between 1900 and 2016 to estimate the net change in harvest-related stores for the last decade. The losses from later carbon pools depend on the accumulation in the previou…	Other/Unsure	1. Life-span of carbon disposed into landfills 2. The greatest uncertainty involves the lifespan of long-term structures such as buildings	Oregon	1900-2016 Data Sources: The data used in these calculations were taken from Harmon et al (1996) model and updated using USFS reports on the forest products industry and harvest to fill in values for the post 1992 period (Ward 1997, Brandt et al 2003, Gale et al 2012, and Simmonds et al. 2016). Harvests after 1942 from different ownerships was based on ODF reports. Prior to 1942 it was assumed tha…	No	N/A	harvested stem / C stored in wood products	1. The model tracks the flows of harvested stem carbon into different manufacturing streams, flows into different uses, flows into different forms of disposal (including recycling), and the flows out of various forms of disposal. In addition, it tracks the flows leaving products being used to the atmosphere via combustion and decomposition.	N/A	N/A	N/A	N/A	N/A	N/A	Landfill LifeSpan Assumption 100avg/460max; Long-lived 50	Mulch, paper, lumber (from saw logs) used in short and long-term structures, plywood (from veneer logs) used in short and long-term structures, waste (to be incinerated or combusted for energy); Over the 1900 to 2016 period 673 Tg C of harvested wood has been allocated to saw logs (71.7%), 189.9 Tg C to veneer logs, (20.2%), and 76.3 Tg C to pulp logs (8.1%); SEE PROCESS FLOW MAP CREATED	50 average; 230 max	Mulch (10 avg., 46 max); paper (7 avg.; 30 max); short term structures (7 avg.; 31 max); long term structures (50 avg.; 230 max); products that end up in landfill (avg. 200; 920 max); products that end up in open dumps (3 avg.; 14 max); SEE PROCESS FLOW MAP CREATED	N/A	1. Carbon offsets via energy substitution; The fraction of total carbon emissions from manufacturing, use, and disposal of forest harvested carbon “offset” by energy substitution is low, ranging between 4 to 12%.	1. Mulch: Over the 1900 to 2016 period a total of 111.8 Tg C has been either been incinerated or used as fuel and 16 Tg C has been used as mulch. If one assumes that since 1975 all the latter flow (mulch?) has involved energy capture then a total of 38.6 Tg C might be offset to some degree by energy substitution. 2. Lumber: Over the 1900 to 2016 period a total of 327.8 Tg C of lumber has been pro…	N/A	N/A	1. The amount of stem C harvested was highest in the 1950 to 1980 period (Figure 1). Prior to 1950 the harvest generally increased, although there were declines associated with the Great Depression and other economic downturns. After 1980 the largest decline occurred due to a reduction in harvesting on Federal forest lands. Temporary declines with the recessions in the early 1980’s and 2008 are a…	Mixed, Other	N/A	N/A	N/A	N/A	1. Mulch (decomposition); paper (disposal, decomposition, or combined); short term structures (disposal or decomposition/combustion); long term structures (disposal or decomposition/combustion) 2. Paper end of life assumptions is 50% energy generation and 50% decomposition in sludge pools 3. Saw log waste was mostly incinerated prior to 1970, and primarily used in energy generation for hog fuel a…	N/A	N/A	0.096	NET ACCUMULATION: Ratio of the net change in stores to harvest (NCS to H ratio (across all ownerships from 2003-2013; timeframe overlaps the FIA inventory estimates of harvest and ecosystem stores); what is the estimated net accumulation of carbon in solid wood products in-use and disposed?; For federal, private, and other ownerships this ratio for the same period was -0.811, 0.184, and 0.288 res…	N/A	N/A	N/A	N/A	N/A	1. To get a rough sense of how much of the harvested carbon is retained one can compare the accumulated store to the cumulative harvest over time (Figure 17); An important metric to help estimate the net accumulation of carbon in solid wood products in-use and disposed is the ratio of the net change in stores to harvest (NCS to H ratio). In effect this allows one to estimate the net change in sto…	1. Does model account for extraction of the raw materials (harvested stem) for the wood products? (Manufacturing, In Use, and Disposal included)
1	Harmon	Modeled Carbon Stores in Oregon’s Wood Products: 1900-2016	2018 (draft)	Harvest carbon store modeling	1. The following report describes one process to model store in harvest-related carbon and the changes in these pools over time and presents the results from simulations using Oregon-based data. The analysis considers harvests between 1900 and 2016 to estimate the net change in harvest-related stores for the last decade. The losses from later carbon pools depend on the accumulation in the previou…	Other/Unsure	1. Life-span of carbon disposed into landfills 2. The greatest uncertainty involves the lifespan of long-term structures such as buildings	Oregon	1900-2016 Data Sources: The data used in these calculations were taken from Harmon et al (1996) model and updated using USFS reports on the forest products industry and harvest to fill in values for the post 1992 period (Ward 1997, Brandt et al 2003, Gale et al 2012, and Simmonds et al. 2016). Harvests after 1942 from different ownerships was based on ODF reports. Prior to 1942 it was assumed tha…	No	N/A	harvested stem / C stored in wood products	1. The model tracks the flows of harvested stem carbon into different manufacturing streams, flows into different uses, flows into different forms of disposal (including recycling), and the flows out of various forms of disposal. In addition, it tracks the flows leaving products being used to the atmosphere via combustion and decomposition.	N/A	N/A	N/A	N/A	N/A	N/A	Landfill LifeSpan Assumption 300avg/1380max; Long-lived 50	Mulch, paper, lumber (from saw logs) used in short and long-term structures, plywood (from veneer logs) used in short and long-term structures, waste (to be incinerated or combusted for energy); Over the 1900 to 2016 period 673 Tg C of harvested wood has been allocated to saw logs (71.7%), 189.9 Tg C to veneer logs, (20.2%), and 76.3 Tg C to pulp logs (8.1%); SEE PROCESS FLOW MAP CREATED	50 average; 230 max	Mulch (10 avg., 46 max); paper (7 avg.; 30 max); short term structures (7 avg.; 31 max); long term structures (50 avg.; 230 max); products that end up in landfill (avg. 200; 920 max); products that end up in open dumps (3 avg.; 14 max); SEE PROCESS FLOW MAP CREATED	N/A	1. Carbon offsets via energy substitution; The fraction of total carbon emissions from manufacturing, use, and disposal of forest harvested carbon “offset” by energy substitution is low, ranging between 4 to 12%.	1. Mulch: Over the 1900 to 2016 period a total of 111.8 Tg C has been either been incinerated or used as fuel and 16 Tg C has been used as mulch. If one assumes that since 1975 all the latter flow (mulch?) has involved energy capture then a total of 38.6 Tg C might be offset to some degree by energy substitution. 2. Lumber: Over the 1900 to 2016 period a total of 327.8 Tg C of lumber has been pro…	N/A	N/A	1. The amount of stem C harvested was highest in the 1950 to 1980 period (Figure 1). Prior to 1950 the harvest generally increased, although there were declines associated with the Great Depression and other economic downturns. After 1980 the largest decline occurred due to a reduction in harvesting on Federal forest lands. Temporary declines with the recessions in the early 1980’s and 2008 are a…	Mixed, Other	N/A	N/A	N/A	N/A	1. Mulch (decomposition); paper (disposal, decomposition, or combined); short term structures (disposal or decomposition/combustion); long term structures (disposal or decomposition/combustion) 2. Paper end of life assumptions is 50% energy generation and 50% decomposition in sludge pools 3. Saw log waste was mostly incinerated prior to 1970, and primarily used in energy generation for hog fuel a…	N/A	N/A	0.156	NET ACCUMULATION: Ratio of the net change in stores to harvest (NCS to H ratio (across all ownerships from 2003-2013; timeframe overlaps the FIA inventory estimates of harvest and ecosystem stores); what is the estimated net accumulation of carbon in solid wood products in-use and disposed?; For federal, private, and other ownerships this ratio for the same period was -0.599, 0.244, and 0.327 res…	N/A	N/A	N/A	N/A	N/A	1. To get a rough sense of how much of the harvested carbon is retained one can compare the accumulated store to the cumulative harvest over time (Figure 17); An important metric to help estimate the net accumulation of carbon in solid wood products in-use and disposed is the ratio of the net change in stores to harvest (NCS to H ratio). In effect this allows one to estimate the net change in sto…	1. Does model account for extraction of the raw materials (harvested stem) for the wood products? (Manufacturing, In Use, and Disposal included)
1	Harmon	Modeled Carbon Stores in Oregon’s Wood Products: 1900-2016	2018 (draft)	Harvest carbon store modeling	1. The following report describes one process to model store in harvest-related carbon and the changes in these pools over time and presents the results from simulations using Oregon-based data. The analysis considers harvests between 1900 and 2016 to estimate the net change in harvest-related stores for the last decade. The losses from later carbon pools depend on the accumulation in the previou…	Other/Unsure	1. Life-span of carbon disposed into landfills 2. The greatest uncertainty involves the lifespan of long-term structures such as buildings	Oregon	1900-2016 Data Sources: The data used in these calculations were taken from Harmon et al (1996) model and updated using USFS reports on the forest products industry and harvest to fill in values for the post 1992 period (Ward 1997, Brandt et al 2003, Gale et al 2012, and Simmonds et al. 2016). Harvests after 1942 from different ownerships was based on ODF reports. Prior to 1942 it was assumed tha…	No	N/A	harvested stem / C stored in wood products	1. The model tracks the flows of harvested stem carbon into different manufacturing streams, flows into different uses, flows into different forms of disposal (including recycling), and the flows out of various forms of disposal. In addition, it tracks the flows leaving products being used to the atmosphere via combustion and decomposition.	N/A	N/A	N/A	N/A	N/A	N/A	Landfill LifeSpan Assumption 400avg/1840max; Long-lived 50	Mulch, paper, lumber (from saw logs) used in short and long-term structures, plywood (from veneer logs) used in short and long-term structures, waste (to be incinerated or combusted for energy); Over the 1900 to 2016 period 673 Tg C of harvested wood has been allocated to saw logs (71.7%), 189.9 Tg C to veneer logs, (20.2%), and 76.3 Tg C to pulp logs (8.1%); SEE PROCESS FLOW MAP CREATED	50 average; 230 max	Mulch (10 avg., 46 max); paper (7 avg.; 30 max); short term structures (7 avg.; 31 max); long term structures (50 avg.; 230 max); products that end up in landfill (avg. 200; 920 max); products that end up in open dumps (3 avg.; 14 max); SEE PROCESS FLOW MAP CREATED	N/A	1. Carbon offsets via energy substitution; The fraction of total carbon emissions from manufacturing, use, and disposal of forest harvested carbon “offset” by energy substitution is low, ranging between 4 to 12%.	1. Mulch: Over the 1900 to 2016 period a total of 111.8 Tg C has been either been incinerated or used as fuel and 16 Tg C has been used as mulch. If one assumes that since 1975 all the latter flow (mulch?) has involved energy capture then a total of 38.6 Tg C might be offset to some degree by energy substitution. 2. Lumber: Over the 1900 to 2016 period a total of 327.8 Tg C of lumber has been pro…	N/A	N/A	1. The amount of stem C harvested was highest in the 1950 to 1980 period (Figure 1). Prior to 1950 the harvest generally increased, although there were declines associated with the Great Depression and other economic downturns. After 1980 the largest decline occurred due to a reduction in harvesting on Federal forest lands. Temporary declines with the recessions in the early 1980’s and 2008 are a…	Mixed, Other	N/A	N/A	N/A	N/A	1. Mulch (decomposition); paper (disposal, decomposition, or combined); short term structures (disposal or decomposition/combustion); long term structures (disposal or decomposition/combustion) 2. Paper end of life assumptions is 50% energy generation and 50% decomposition in sludge pools 3. Saw log waste was mostly incinerated prior to 1970, and primarily used in energy generation for hog fuel a…	N/A	N/A	0.164	NET ACCUMULATION: Ratio of the net change in stores to harvest (NCS to H ratio (across all ownerships from 2003-2013; timeframe overlaps the FIA inventory estimates of harvest and ecosystem stores); what is the estimated net accumulation of carbon in solid wood products in-use and disposed?; For federal, private, and other ownerships this ratio for the same period was -0.570, 0.234, and 0.327 res…	N/A	N/A	N/A	N/A	N/A	1. To get a rough sense of how much of the harvested carbon is retained one can compare the accumulated store to the cumulative harvest over time (Figure 17); An important metric to help estimate the net accumulation of carbon in solid wood products in-use and disposed is the ratio of the net change in stores to harvest (NCS to H ratio). In effect this allows one to estimate the net change in sto…	1. Does model account for extraction of the raw materials (harvested stem) for the wood products? (Manufacturing, In Use, and Disposal included)
1	Birdsey et al	Climate, economic, and environmental impacts of producing wood for bioenergy	2018	Life cycle carbon accounting	The purposes of this concise reviewof current literature are to (1) examine impacts on net GHGemissions and climate from increasing bioenergy production from forests and exportingwood pellets to Europe from North America, (2) develop a set of science-based recommendations about the circumstances that would result in GHGreductions or increases in the atmosphere, and (3) identify economic and envir…	Other/Unsure	1. Feasibilityof large-scale deployment ofBECCShas not been demonstrated, nor have its potential and risks including consequences ofdevoting somuch land area to energy crops been fullyexamined 2. Using this highly simplified accounting method to assess climate change mitigation options may lead to counter-productive outcomes, because it doesnot fullyreflect theimpactsofbioenergyuseon the atmosphe…	North America (Southeast US), Europe, Canada	N/A	No	N/A	roots, stem, crown, litter + wood products	N/A	N/A	N/A	1. Logging residues are also highly valued for wildlife habitat and biodiversity, so increasing their use is likely to have ecological consequences that go well beyond soil pro- ductivity	N/A	N/A	N/A	N/A	Bioenergy and wood products	N/A	N/A	N/A	Is Discussed	1. Our analysis did not consider the ‘carbon cap-ture and storage’element of BECCS. By capturing and storing emitted CO2 from electricity genera- tion before it reaches the atmosphere, the benefits offuel substitution would be significantly greater and would likely greatly reduce the time to reach carbon sequestration parity.	N/A	N/A	N/A	Mixed, Other	N/A	Suggests 100 years	N/A	N/A	N/A	N/A	N/A	N/A	N/A	1. Alternative uses of roundwood often offer larger reductions in GHGs, in particular long-lived wood products that store carbon for longer periods of time and can achieve greater substitution benefits than bioenergy. 2. A recent study (Booth 2018) demonstrated that in contrast to being carbon neutral, common uses of wood for bioenergy resulted in net increases of CO2 in the atmosphere, depending…	1. Usingwood residues (e.g. tops, stumps, branches) for bioenergy that would otherwise have been left to decompose (typical in the SE) or burned to reduce wildfire risk (typical in Canada) results in net emis- sions reductions over a shorter term, often less than 20 years. On the other hand, if thewood residueswould otherwise have been used in a long-lived product such as particle board, it could…	Wildlife and other ES	Discussed	1. Moreover, converting roundwood into long- lived wood products and using only harvest, milling and other residues for bioenergy is likely to have a much greatermitigation benefit than usingroundwood as bioenergy feedstock. Over the longer term, reductions in emissions are possible from harvesting roundwood for bioenergy because of the cumulative effects of displacement of fossil fuels and fores…	1. We find that increasing bioenergy production and pellet exports (from North America to Europe) often increase net emissions ofGHGs for decades or longer, depending on source of feedstock and its alternate fate, time horizon of analysis, energy emissions associated with the supply chain and fuel substitution, and impacts on carbon cycling of forest ecosystems. Alternative uses of roundwood ofte…	1. Is the EU RED integrated with US and Canada GHG emission accounting somehow so that global accounting (or the complete cycle) is somehow captured?
1	Gunn & Buchholz	Forest sector greenhouse gas emissions sensitivity to changes in forest management in Maine (USA)	2018	Life cycle carbon accounting	1. We used a life cycle greenhouse gas (GHG) accounting tool to test the sensitivity of Maine’s state-wide forest sector GHG emissions to changes in forest management; We used a comprehensive life cycle GHG accounting tool developed for Maine (Hennigar et al., 2013) to evaluate the implications of shifts to greater and lesser forest management intensity from the current baseline set of management…	Mild	1. Defining a baseline is particularly perplexing in themidst a dynamic economy where the recent past may not be a good predictor of the future.	Maine, USA	N/A	Yes	Attributional	roots, stem, crown, litter + wood products	1. C pools included: (1) storage in above- and below-ground live and dead biomass; (2) storage in forest products in use and in landfills; (3) harvest, transport, and manufacturing emissions; (4) avoided emissions (substitution, bioenergy); and (5) landfill methane fluxes. 2. We did not track the soil C pool because FIA plot input data used in ForGATE do not include this pool.	N/A	N/A	N/A	The FVS-NE simulations used to generate lookup tables in the ForGATE tool did not account for natural disturbances or climate change impacts that would undoubtedly play a role in these long-term projections	N/A	1. Continuation of the baseline forest sector was a net GHG sink throughout the 300-year modelling period. Increasing management intensity through greater use of even-aged management increased total emissions compared with the baseline. 2. We defined Baseline forest condition based upon US Forest Service FIA statewide data. FIA data are derived from a continuous forest inventory system on a 5-yea…	Double set aside area	Wood products and bioenergy	N/A	N/A	N/A	Used	1. Emissions pools asso- ciated with GHG emissions that are potentially avoided from the use of wood to substitute for fossil energy production and the use of wood to substitute for C-intensive building products such as concrete and steel are also estimated. 2. (there's values for without product substitution consideration but I did not input them here) 3. For example, if timber use in the constr…	Discussed but not quantified	N/A	N/A	Negative	N/A	100 years	N/A	1. The FVS-NE simulations used to generate lookup tables in the ForGATE tool did not account for natural disturbances or climate change impacts that would undoubtedly play a role in these long-term projections	1. Additionally, 14 per cent of the landfill wood is used for energy (Heath et al.,2010) and 49 per cent of methane captured at landfills is also used for energy	1. We held assumptions constant in the alternative scenario for all operations, manufacturing and end use emissions vari- ables (including landfill management). Only the silvicultural regimes were modified from the Baseline to evaluate the impacts of alternative forest management scenarios. 2. We assumed that 20 per cent of the harvests in each year used tree tops and limbs (harvest residues) for…	1% (Net % change in sequestration from BAU at Year 100) - Percent change from Baseline for six alternative statewide management scenarios. Negative numbers indicate less sequestration than the baseline (i.e. net emission) (there's values for without product substitution consideration but I did not input them here)	N/A	N/A	1. Most studies of biomass GHG emissions assume that wood displaces fossil fuel energy sources (Buchholz et al., 2016). This assumption may not always hold, particularly where other renewable energy sources may be diminished by the promotion of stand-alone biomass electric power generation in renewable energy policy. If the use of RECs by stand-alone biomass power causes the dis- placement of ren…	N/A	N/A	N/A	1. All increased intensity scenarios reduced net sequestration com- pared with the Baseline at Year 100 (ranging from −8to −30 per cent; Table 6). At year 300, net sequestration was still reduced, but slightly less than year 100 in each case 2. Decreasing the intensity of management across the landscape generally resulted in greater C storage in the long term. The best performing scenario from a …	1. Scenarios that increase the area of no harvest set asides compared favourably with baseline GHG emissions predicted for reduced harvesting intensity scenarios when ***product substitution was not considered***. The sensitivity of results to inclusion or exclusion of GHG pools, such as avoided emissions through product substitution, illustrates the importance of assumptions when evaluating comp…	N/A
2	Gunn & Buchholz	Forest sector greenhouse gas emissions sensitivity to changes in forest management in Maine (USA)	2018	Life cycle carbon accounting	1. We used a life cycle greenhouse gas (GHG) accounting tool to test the sensitivity of Maine’s state-wide forest sector GHG emissions to changes in forest management; We used a comprehensive life cycle GHG accounting tool developed for Maine (Hennigar et al., 2013) to evaluate the implications of shifts to greater and lesser forest management intensity from the current baseline set of management…	Mild	1. Defining a baseline is particularly perplexing in themidst a dynamic economy where the recent past may not be a good predictor of the future.	Maine, USA	N/A	Yes	Attributional	roots, stem, crown, litter + wood products	1. C pools included: (1) storage in above- and below-ground live and dead biomass; (2) storage in forest products in use and in landfills; (3) harvest, transport, and manufacturing emissions; (4) avoided emissions (substitution, bioenergy); and (5) landfill methane fluxes. 2. We did not track the soil C pool because FIA plot input data used in ForGATE do not include this pool.	N/A	N/A	N/A	The FVS-NE simulations used to generate lookup tables in the ForGATE tool did not account for natural disturbances or climate change impacts that would undoubtedly play a role in these long-term projections	N/A	1. Continuation of the baseline forest sector was a net GHG sink throughout the 300-year modelling period. Increasing management intensity through greater use of even-aged management increased total emissions compared with the baseline. 2. We defined Baseline forest condition based upon US Forest Service FIA statewide data. FIA data are derived from a continuous forest inventory system on a 5-yea…	Quadruple set aside area	Wood products and bioenergy	N/A	N/A	N/A	Used	1. Emissions pools asso- ciated with GHG emissions that are potentially avoided from the use of wood to substitute for fossil energy production and the use of wood to substitute for C-intensive building products such as concrete and steel are also estimated. 2. (there's values for without product substitution consideration but I did not input them here) 3. For example, if timber use in the constr…	Discussed but not quantified	N/A	N/A	Negative	N/A	100 years	N/A	1. The FVS-NE simulations used to generate lookup tables in the ForGATE tool did not account for natural disturbances or climate change impacts that would undoubtedly play a role in these long-term projections	1. Additionally, 14 per cent of the landfill wood is used for energy (Heath et al.,2010) and 49 per cent of methane captured at landfills is also used for energy	1. We held assumptions constant in the alternative scenario for all operations, manufacturing and end use emissions vari- ables (including landfill management). Only the silvicultural regimes were modified from the Baseline to evaluate the impacts of alternative forest management scenarios. 2. We assumed that 20 per cent of the harvests in each year used tree tops and limbs (harvest residues) for…	4% (Net % change in sequestration from BAU at Year 100) - Percent change from Baseline for six alternative statewide management scenarios. Negative numbers indicate less sequestration than the baseline (i.e. net emission) (there's values for without product substitution consideration but I did not input them here)	N/A	N/A	1. Most studies of biomass GHG emissions assume that wood displaces fossil fuel energy sources (Buchholz et al., 2016). This assumption may not always hold, particularly where other renewable energy sources may be diminished by the promotion of stand-alone biomass electric power generation in renewable energy policy. If the use of RECs by stand-alone biomass power causes the dis- placement of ren…	N/A	N/A	N/A	1. All increased intensity scenarios reduced net sequestration com- pared with the Baseline at Year 100 (ranging from −8to −30 per cent; Table 6). At year 300, net sequestration was still reduced, but slightly less than year 100 in each case 2. Decreasing the intensity of management across the landscape generally resulted in greater C storage in the long term. The best performing scenario from a …	1. Scenarios that increase the area of no harvest set asides compared favourably with baseline GHG emissions predicted for reduced harvesting intensity scenarios when ***product substitution was not considered***. The sensitivity of results to inclusion or exclusion of GHG pools, such as avoided emissions through product substitution, illustrates the importance of assumptions when evaluating comp…	N/A
2	Gunn & Buchholz	Forest sector greenhouse gas emissions sensitivity to changes in forest management in Maine (USA)	2018	Life cycle carbon accounting	1. We used a life cycle greenhouse gas (GHG) accounting tool to test the sensitivity of Maine’s state-wide forest sector GHG emissions to changes in forest management; We used a comprehensive life cycle GHG accounting tool developed for Maine (Hennigar et al., 2013) to evaluate the implications of shifts to greater and lesser forest management intensity from the current baseline set of management…	Mild	1. Defining a baseline is particularly perplexing in themidst a dynamic economy where the recent past may not be a good predictor of the future.	Maine, USA	N/A	Yes	Attributional	roots, stem, crown, litter + wood products	1. C pools included: (1) storage in above- and below-ground live and dead biomass; (2) storage in forest products in use and in landfills; (3) harvest, transport, and manufacturing emissions; (4) avoided emissions (substitution, bioenergy); and (5) landfill methane fluxes. 2. We did not track the soil C pool because FIA plot input data used in ForGATE do not include this pool.	N/A	N/A	N/A	The FVS-NE simulations used to generate lookup tables in the ForGATE tool did not account for natural disturbances or climate change impacts that would undoubtedly play a role in these long-term projections	N/A	1. Continuation of the baseline forest sector was a net GHG sink throughout the 300-year modelling period. Increasing management intensity through greater use of even-aged management increased total emissions compared with the baseline. 2. We defined Baseline forest condition based upon US Forest Service FIA statewide data. FIA data are derived from a continuous forest inventory system on a 5-yea…	Uneven-aged - by moving more managed forest (52%) into an uneven-aged silvicultural regime	Wood products and bioenergy	N/A	N/A	N/A	Used	1. Emissions pools asso- ciated with GHG emissions that are potentially avoided from the use of wood to substitute for fossil energy production and the use of wood to substitute for C-intensive building products such as concrete and steel are also estimated. 2. (there's values for without product substitution consideration but I did not input them here) 3. For example, if timber use in the constr…	Discussed but not quantified	N/A	N/A	Negative	N/A	100 years	N/A	1. The FVS-NE simulations used to generate lookup tables in the ForGATE tool did not account for natural disturbances or climate change impacts that would undoubtedly play a role in these long-term projections	1. Additionally, 14 per cent of the landfill wood is used for energy (Heath et al.,2010) and 49 per cent of methane captured at landfills is also used for energy	1. We held assumptions constant in the alternative scenario for all operations, manufacturing and end use emissions vari- ables (including landfill management). Only the silvicultural regimes were modified from the Baseline to evaluate the impacts of alternative forest management scenarios. 2. We assumed that 20 per cent of the harvests in each year used tree tops and limbs (harvest residues) for…	14% (Net % change in sequestration from BAU at Year 100) - Percent change from Baseline for six alternative statewide management scenarios. Negative numbers indicate less sequestration than the baseline (i.e. net emission) (there's values for without product substitution consideration but I did not input them here)	N/A	N/A	1. Most studies of biomass GHG emissions assume that wood displaces fossil fuel energy sources (Buchholz et al., 2016). This assumption may not always hold, particularly where other renewable energy sources may be diminished by the promotion of stand-alone biomass electric power generation in renewable energy policy. If the use of RECs by stand-alone biomass power causes the dis- placement of ren…	N/A	N/A	N/A	1. All increased intensity scenarios reduced net sequestration com- pared with the Baseline at Year 100 (ranging from −8to −30 per cent; Table 6). At year 300, net sequestration was still reduced, but slightly less than year 100 in each case 2. Decreasing the intensity of management across the landscape generally resulted in greater C storage in the long term. The best performing scenario from a …	1. Scenarios that increase the area of no harvest set asides compared favourably with baseline GHG emissions predicted for reduced harvesting intensity scenarios when ***product substitution was not considered***. The sensitivity of results to inclusion or exclusion of GHG pools, such as avoided emissions through product substitution, illustrates the importance of assumptions when evaluating comp…	N/A
2	Gunn & Buchholz	Forest sector greenhouse gas emissions sensitivity to changes in forest management in Maine (USA)	2018	Life cycle carbon accounting	1. We used a life cycle greenhouse gas (GHG) accounting tool to test the sensitivity of Maine’s state-wide forest sector GHG emissions to changes in forest management; We used a comprehensive life cycle GHG accounting tool developed for Maine (Hennigar et al., 2013) to evaluate the implications of shifts to greater and lesser forest management intensity from the current baseline set of management…	Mild	1. Defining a baseline is particularly perplexing in themidst a dynamic economy where the recent past may not be a good predictor of the future.	Maine, USA	N/A	Yes	Attributional	roots, stem, crown, litter + wood products	1. C pools included: (1) storage in above- and below-ground live and dead biomass; (2) storage in forest products in use and in landfills; (3) harvest, transport, and manufacturing emissions; (4) avoided emissions (substitution, bioenergy); and (5) landfill methane fluxes. 2. We did not track the soil C pool because FIA plot input data used in ForGATE do not include this pool.	N/A	N/A	N/A	The FVS-NE simulations used to generate lookup tables in the ForGATE tool did not account for natural disturbances or climate change impacts that would undoubtedly play a role in these long-term projections	N/A	1. Continuation of the baseline forest sector was a net GHG sink throughout the 300-year modelling period. Increasing management intensity through greater use of even-aged management increased total emissions compared with the baseline. 2. We defined Baseline forest condition based upon US Forest Service FIA statewide data. FIA data are derived from a continuous forest inventory system on a 5-yea…	100-Year clearcut - putting more forest area into even-aged systems that used clearcutting as the regeneration method (i.e. increase from 3.85 per cent in Baseline to 51.99 per cent in each clearcut scenario	Wood products and bioenergy	N/A	N/A	N/A	Used	1. Emissions pools asso- ciated with GHG emissions that are potentially avoided from the use of wood to substitute for fossil energy production and the use of wood to substitute for C-intensive building products such as concrete and steel are also estimated. 2. (there's values for without product substitution consideration but I did not input them here) 3. For example, if timber use in the constr…	Discussed but not quantified	N/A	N/A	Negative	N/A	100 years	N/A	1. The FVS-NE simulations used to generate lookup tables in the ForGATE tool did not account for natural disturbances or climate change impacts that would undoubtedly play a role in these long-term projections	1. Additionally, 14 per cent of the landfill wood is used for energy (Heath et al.,2010) and 49 per cent of methane captured at landfills is also used for energy	1. We held assumptions constant in the alternative scenario for all operations, manufacturing and end use emissions vari- ables (including landfill management). Only the silvicultural regimes were modified from the Baseline to evaluate the impacts of alternative forest management scenarios. 2. We assumed that 20 per cent of the harvests in each year used tree tops and limbs (harvest residues) for…	-22% (Net % change in sequestration from BAU at Year 100) - Percent change from Baseline for six alternative statewide management scenarios. Negative numbers indicate less sequestration than the baseline (i.e. net emission) (there's values for without product substitution consideration but I did not input them here)	N/A	N/A	1. Most studies of biomass GHG emissions assume that wood displaces fossil fuel energy sources (Buchholz et al., 2016). This assumption may not always hold, particularly where other renewable energy sources may be diminished by the promotion of stand-alone biomass electric power generation in renewable energy policy. If the use of RECs by stand-alone biomass power causes the dis- placement of ren…	N/A	N/A	N/A	1. All increased intensity scenarios reduced net sequestration com- pared with the Baseline at Year 100 (ranging from −8to −30 per cent; Table 6). At year 300, net sequestration was still reduced, but slightly less than year 100 in each case 2. Decreasing the intensity of management across the landscape generally resulted in greater C storage in the long term. The best performing scenario from a …	1. Scenarios that increase the area of no harvest set asides compared favourably with baseline GHG emissions predicted for reduced harvesting intensity scenarios when ***product substitution was not considered***. The sensitivity of results to inclusion or exclusion of GHG pools, such as avoided emissions through product substitution, illustrates the importance of assumptions when evaluating comp…	N/A
2	Gunn & Buchholz	Forest sector greenhouse gas emissions sensitivity to changes in forest management in Maine (USA)	2018	Life cycle carbon accounting	1. We used a life cycle greenhouse gas (GHG) accounting tool to test the sensitivity of Maine’s state-wide forest sector GHG emissions to changes in forest management; We used a comprehensive life cycle GHG accounting tool developed for Maine (Hennigar et al., 2013) to evaluate the implications of shifts to greater and lesser forest management intensity from the current baseline set of management…	Mild	1. Defining a baseline is particularly perplexing in themidst a dynamic economy where the recent past may not be a good predictor of the future.	Maine, USA	N/A	Yes	Attributional	roots, stem, crown, litter + wood products	1. C pools included: (1) storage in above- and below-ground live and dead biomass; (2) storage in forest products in use and in landfills; (3) harvest, transport, and manufacturing emissions; (4) avoided emissions (substitution, bioenergy); and (5) landfill methane fluxes. 2. We did not track the soil C pool because FIA plot input data used in ForGATE do not include this pool.	N/A	N/A	N/A	The FVS-NE simulations used to generate lookup tables in the ForGATE tool did not account for natural disturbances or climate change impacts that would undoubtedly play a role in these long-term projections	N/A	1. Continuation of the baseline forest sector was a net GHG sink throughout the 300-year modelling period. Increasing management intensity through greater use of even-aged management increased total emissions compared with the baseline. 2. We defined Baseline forest condition based upon US Forest Service FIA statewide data. FIA data are derived from a continuous forest inventory system on a 5-yea…	60-Year clearcut -putting more forest area into even-aged systems that used clearcutting as the regeneration method (i.e. increase from 3.85 per cent in Baseline to 51.99 per cent in each clearcut scenario	Wood products and bioenergy	N/A	N/A	N/A	Used	1. Emissions pools asso- ciated with GHG emissions that are potentially avoided from the use of wood to substitute for fossil energy production and the use of wood to substitute for C-intensive building products such as concrete and steel are also estimated. 2. (there's values for without product substitution consideration but I did not input them here) 3. For example, if timber use in the constr…	Discussed but not quantified	N/A	N/A	Negative	N/A	100 years	N/A	1. The FVS-NE simulations used to generate lookup tables in the ForGATE tool did not account for natural disturbances or climate change impacts that would undoubtedly play a role in these long-term projections	1. Additionally, 14 per cent of the landfill wood is used for energy (Heath et al.,2010) and 49 per cent of methane captured at landfills is also used for energy	1. We held assumptions constant in the alternative scenario for all operations, manufacturing and end use emissions vari- ables (including landfill management). Only the silvicultural regimes were modified from the Baseline to evaluate the impacts of alternative forest management scenarios. 2. We assumed that 20 per cent of the harvests in each year used tree tops and limbs (harvest residues) for…	-30% (Net % change in sequestration from BAU at Year 100) - Percent change from Baseline for six alternative statewide management scenarios. Negative numbers indicate less sequestration than the baseline (i.e. net emission) (there's values for without product substitution consideration but I did not input them here)	N/A	N/A	1. Most studies of biomass GHG emissions assume that wood displaces fossil fuel energy sources (Buchholz et al., 2016). This assumption may not always hold, particularly where other renewable energy sources may be diminished by the promotion of stand-alone biomass electric power generation in renewable energy policy. If the use of RECs by stand-alone biomass power causes the dis- placement of ren…	N/A	N/A	N/A	1. All increased intensity scenarios reduced net sequestration com- pared with the Baseline at Year 100 (ranging from −8to −30 per cent; Table 6). At year 300, net sequestration was still reduced, but slightly less than year 100 in each case 2. Decreasing the intensity of management across the landscape generally resulted in greater C storage in the long term. The best performing scenario from a …	1. Scenarios that increase the area of no harvest set asides compared favourably with baseline GHG emissions predicted for reduced harvesting intensity scenarios when ***product substitution was not considered***. The sensitivity of results to inclusion or exclusion of GHG pools, such as avoided emissions through product substitution, illustrates the importance of assumptions when evaluating comp…	N/A
2	Gunn & Buchholz	Forest sector greenhouse gas emissions sensitivity to changes in forest management in Maine (USA)	2018	Life cycle carbon accounting	1. We used a life cycle greenhouse gas (GHG) accounting tool to test the sensitivity of Maine’s state-wide forest sector GHG emissions to changes in forest management; We used a comprehensive life cycle GHG accounting tool developed for Maine (Hennigar et al., 2013) to evaluate the implications of shifts to greater and lesser forest management intensity from the current baseline set of management…	Mild	1. Defining a baseline is particularly perplexing in themidst a dynamic economy where the recent past may not be a good predictor of the future.	Maine, USA	N/A	Yes	Attributional	roots, stem, crown, litter + wood products	1. C pools included: (1) storage in above- and below-ground live and dead biomass; (2) storage in forest products in use and in landfills; (3) harvest, transport, and manufacturing emissions; (4) avoided emissions (substitution, bioenergy); and (5) landfill methane fluxes. 2. We did not track the soil C pool because FIA plot input data used in ForGATE do not include this pool.	N/A	N/A	N/A	The FVS-NE simulations used to generate lookup tables in the ForGATE tool did not account for natural disturbances or climate change impacts that would undoubtedly play a role in these long-term projections	N/A	1. Continuation of the baseline forest sector was a net GHG sink throughout the 300-year modelling period. Increasing management intensity through greater use of even-aged management increased total emissions compared with the baseline. 2. We defined Baseline forest condition based upon US Forest Service FIA statewide data. FIA data are derived from a continuous forest inventory system on a 5-yea…	Heavy harvest - shifting Baseline area from the clearcut and uneven-aged regimes into the heavy harvest silvicultural regime	Wood products and bioenergy	N/A	N/A	N/A	Used	1. Emissions pools asso- ciated with GHG emissions that are potentially avoided from the use of wood to substitute for fossil energy production and the use of wood to substitute for C-intensive building products such as concrete and steel are also estimated. 2. (there's values for without product substitution consideration but I did not input them here) 3. For example, if timber use in the constr…	Discussed but not quantified	N/A	N/A	Negative	N/A	100 years	N/A	1. The FVS-NE simulations used to generate lookup tables in the ForGATE tool did not account for natural disturbances or climate change impacts that would undoubtedly play a role in these long-term projections	1. Additionally, 14 per cent of the landfill wood is used for energy (Heath et al.,2010) and 49 per cent of methane captured at landfills is also used for energy	1. We held assumptions constant in the alternative scenario for all operations, manufacturing and end use emissions vari- ables (including landfill management). Only the silvicultural regimes were modified from the Baseline to evaluate the impacts of alternative forest management scenarios. 2. We assumed that 20 per cent of the harvests in each year used tree tops and limbs (harvest residues) for…	-8% (Net % change in sequestration from BAU at Year 100) - Percent change from Baseline for six alternative statewide management scenarios. Negative numbers indicate less sequestration than the baseline (i.e. net emission) (there's values for without product substitution consideration but I did not input them here)	N/A	N/A	1. Most studies of biomass GHG emissions assume that wood displaces fossil fuel energy sources (Buchholz et al., 2016). This assumption may not always hold, particularly where other renewable energy sources may be diminished by the promotion of stand-alone biomass electric power generation in renewable energy policy. If the use of RECs by stand-alone biomass power causes the dis- placement of ren…	N/A	N/A	N/A	1. All increased intensity scenarios reduced net sequestration com- pared with the Baseline at Year 100 (ranging from −8to −30 per cent; Table 6). At year 300, net sequestration was still reduced, but slightly less than year 100 in each case 2. Decreasing the intensity of management across the landscape generally resulted in greater C storage in the long term. The best performing scenario from a …	1. Scenarios that increase the area of no harvest set asides compared favourably with baseline GHG emissions predicted for reduced harvesting intensity scenarios when ***product substitution was not considered***. The sensitivity of results to inclusion or exclusion of GHG pools, such as avoided emissions through product substitution, illustrates the importance of assumptions when evaluating comp…	N/A
2	Gunn & Buchholz	Forest sector greenhouse gas emissions sensitivity to changes in forest management in Maine (USA)	2018	Life cycle carbon accounting	1. We used a life cycle greenhouse gas (GHG) accounting tool to test the sensitivity of Maine’s state-wide forest sector GHG emissions to changes in forest management; We used a comprehensive life cycle GHG accounting tool developed for Maine (Hennigar et al., 2013) to evaluate the implications of shifts to greater and lesser forest management intensity from the current baseline set of management…	Mild	1. Defining a baseline is particularly perplexing in themidst a dynamic economy where the recent past may not be a good predictor of the future.	Maine, USA	N/A	Yes	Attributional	roots, stem, crown, litter + wood products	1. C pools included: (1) storage in above- and below-ground live and dead biomass; (2) storage in forest products in use and in landfills; (3) harvest, transport, and manufacturing emissions; (4) avoided emissions (substitution, bioenergy); and (5) landfill methane fluxes. 2. We did not track the soil C pool because FIA plot input data used in ForGATE do not include this pool.	N/A	N/A	N/A	The FVS-NE simulations used to generate lookup tables in the ForGATE tool did not account for natural disturbances or climate change impacts that would undoubtedly play a role in these long-term projections	N/A	1. Continuation of the baseline forest sector was a net GHG sink throughout the 300-year modelling period. Increasing management intensity through greater use of even-aged management increased total emissions compared with the baseline. 2. We defined Baseline forest condition based upon US Forest Service FIA statewide data. FIA data are derived from a continuous forest inventory system on a 5-yea…	Double set aside area	Wood products and bioenergy	N/A	N/A	N/A	Used	1. Emissions pools asso- ciated with GHG emissions that are potentially avoided from the use of wood to substitute for fossil energy production and the use of wood to substitute for C-intensive building products such as concrete and steel are also estimated. 2. (there's values for without product substitution consideration but I did not input them here) 3. For example, if timber use in the constr…	Discussed but not quantified	N/A	N/A	Negative	N/A	300 years	N/A	1. The FVS-NE simulations used to generate lookup tables in the ForGATE tool did not account for natural disturbances or climate change impacts that would undoubtedly play a role in these long-term projections	1. Additionally, 14 per cent of the landfill wood is used for energy (Heath et al.,2010) and 49 per cent of methane captured at landfills is also used for energy	1. We held assumptions constant in the alternative scenario for all operations, manufacturing and end use emissions vari- ables (including landfill management). Only the silvicultural regimes were modified from the Baseline to evaluate the impacts of alternative forest management scenarios. 2. We assumed that 20 per cent of the harvests in each year used tree tops and limbs (harvest residues) for…	-1 (Net % change in sequestration from BAU at Year 300) - Percent change from Baseline for six alternative statewide management scenarios. Negative numbers indicate less sequestration than the baseline (i.e. net emission) (there's values for without product substitution consideration but I did not input them here)	N/A	N/A	1. Most studies of biomass GHG emissions assume that wood displaces fossil fuel energy sources (Buchholz et al., 2016). This assumption may not always hold, particularly where other renewable energy sources may be diminished by the promotion of stand-alone biomass electric power generation in renewable energy policy. If the use of RECs by stand-alone biomass power causes the dis- placement of ren…	N/A	N/A	N/A	1. All increased intensity scenarios reduced net sequestration com- pared with the Baseline at Year 100 (ranging from −8to −30 per cent; Table 6). At year 300, net sequestration was still reduced, but slightly less than year 100 in each case 2. Decreasing the intensity of management across the landscape generally resulted in greater C storage in the long term. The best performing scenario from a …	1. Scenarios that increase the area of no harvest set asides compared favourably with baseline GHG emissions predicted for reduced harvesting intensity scenarios when ***product substitution was not considered***. The sensitivity of results to inclusion or exclusion of GHG pools, such as avoided emissions through product substitution, illustrates the importance of assumptions when evaluating comp…	N/A
2	Gunn & Buchholz	Forest sector greenhouse gas emissions sensitivity to changes in forest management in Maine (USA)	2018	Life cycle carbon accounting	1. We used a life cycle greenhouse gas (GHG) accounting tool to test the sensitivity of Maine’s state-wide forest sector GHG emissions to changes in forest management; We used a comprehensive life cycle GHG accounting tool developed for Maine (Hennigar et al., 2013) to evaluate the implications of shifts to greater and lesser forest management intensity from the current baseline set of management…	Mild	1. Defining a baseline is particularly perplexing in themidst a dynamic economy where the recent past may not be a good predictor of the future.	Maine, USA	N/A	Yes	Attributional	roots, stem, crown, litter + wood products	1. C pools included: (1) storage in above- and below-ground live and dead biomass; (2) storage in forest products in use and in landfills; (3) harvest, transport, and manufacturing emissions; (4) avoided emissions (substitution, bioenergy); and (5) landfill methane fluxes. 2. We did not track the soil C pool because FIA plot input data used in ForGATE do not include this pool.	N/A	N/A	N/A	The FVS-NE simulations used to generate lookup tables in the ForGATE tool did not account for natural disturbances or climate change impacts that would undoubtedly play a role in these long-term projections	N/A	1. Continuation of the baseline forest sector was a net GHG sink throughout the 300-year modelling period. Increasing management intensity through greater use of even-aged management increased total emissions compared with the baseline. 2. We defined Baseline forest condition based upon US Forest Service FIA statewide data. FIA data are derived from a continuous forest inventory system on a 5-yea…	Quadruple set aside area	Wood products and bioenergy	N/A	N/A	N/A	Used	1. Emissions pools asso- ciated with GHG emissions that are potentially avoided from the use of wood to substitute for fossil energy production and the use of wood to substitute for C-intensive building products such as concrete and steel are also estimated. 2. (there's values for without product substitution consideration but I did not input them here) 3. For example, if timber use in the constr…	Discussed but not quantified	N/A	N/A	Negative	N/A	300 years	N/A	1. The FVS-NE simulations used to generate lookup tables in the ForGATE tool did not account for natural disturbances or climate change impacts that would undoubtedly play a role in these long-term projections	1. Additionally, 14 per cent of the landfill wood is used for energy (Heath et al.,2010) and 49 per cent of methane captured at landfills is also used for energy	1. We held assumptions constant in the alternative scenario for all operations, manufacturing and end use emissions vari- ables (including landfill management). Only the silvicultural regimes were modified from the Baseline to evaluate the impacts of alternative forest management scenarios. 2. We assumed that 20 per cent of the harvests in each year used tree tops and limbs (harvest residues) for…	-3% (Net % change in sequestration from BAU at Year 300) - Percent change from Baseline for six alternative statewide management scenarios. Negative numbers indicate less sequestration than the baseline (i.e. net emission) (there's values for without product substitution consideration but I did not input them here)	N/A	N/A	1. Most studies of biomass GHG emissions assume that wood displaces fossil fuel energy sources (Buchholz et al., 2016). This assumption may not always hold, particularly where other renewable energy sources may be diminished by the promotion of stand-alone biomass electric power generation in renewable energy policy. If the use of RECs by stand-alone biomass power causes the dis- placement of ren…	N/A	N/A	N/A	1. All increased intensity scenarios reduced net sequestration com- pared with the Baseline at Year 100 (ranging from −8to −30 per cent; Table 6). At year 300, net sequestration was still reduced, but slightly less than year 100 in each case 2. Decreasing the intensity of management across the landscape generally resulted in greater C storage in the long term. The best performing scenario from a …	1. Scenarios that increase the area of no harvest set asides compared favourably with baseline GHG emissions predicted for reduced harvesting intensity scenarios when ***product substitution was not considered***. The sensitivity of results to inclusion or exclusion of GHG pools, such as avoided emissions through product substitution, illustrates the importance of assumptions when evaluating comp…	N/A
2	Gunn & Buchholz	Forest sector greenhouse gas emissions sensitivity to changes in forest management in Maine (USA)	2018	Life cycle carbon accounting	1. We used a life cycle greenhouse gas (GHG) accounting tool to test the sensitivity of Maine’s state-wide forest sector GHG emissions to changes in forest management; We used a comprehensive life cycle GHG accounting tool developed for Maine (Hennigar et al., 2013) to evaluate the implications of shifts to greater and lesser forest management intensity from the current baseline set of management…	Mild	1. Defining a baseline is particularly perplexing in themidst a dynamic economy where the recent past may not be a good predictor of the future.	Maine, USA	N/A	Yes	Attributional	roots, stem, crown, litter + wood products	1. C pools included: (1) storage in above- and below-ground live and dead biomass; (2) storage in forest products in use and in landfills; (3) harvest, transport, and manufacturing emissions; (4) avoided emissions (substitution, bioenergy); and (5) landfill methane fluxes. 2. We did not track the soil C pool because FIA plot input data used in ForGATE do not include this pool.	N/A	N/A	N/A	The FVS-NE simulations used to generate lookup tables in the ForGATE tool did not account for natural disturbances or climate change impacts that would undoubtedly play a role in these long-term projections	N/A	1. Continuation of the baseline forest sector was a net GHG sink throughout the 300-year modelling period. Increasing management intensity through greater use of even-aged management increased total emissions compared with the baseline. 2. We defined Baseline forest condition based upon US Forest Service FIA statewide data. FIA data are derived from a continuous forest inventory system on a 5-yea…	Uneven-aged - by moving more managed forest (52%) into an uneven-aged silvicultural regime	Wood products and bioenergy	N/A	N/A	N/A	Used	1. Emissions pools asso- ciated with GHG emissions that are potentially avoided from the use of wood to substitute for fossil energy production and the use of wood to substitute for C-intensive building products such as concrete and steel are also estimated. 2. (there's values for without product substitution consideration but I did not input them here) 3. For example, if timber use in the constr…	Discussed but not quantified	N/A	N/A	Negative	N/A	300 years	N/A	1. The FVS-NE simulations used to generate lookup tables in the ForGATE tool did not account for natural disturbances or climate change impacts that would undoubtedly play a role in these long-term projections	1. Additionally, 14 per cent of the landfill wood is used for energy (Heath et al.,2010) and 49 per cent of methane captured at landfills is also used for energy	1. We held assumptions constant in the alternative scenario for all operations, manufacturing and end use emissions vari- ables (including landfill management). Only the silvicultural regimes were modified from the Baseline to evaluate the impacts of alternative forest management scenarios. 2. We assumed that 20 per cent of the harvests in each year used tree tops and limbs (harvest residues) for…	10% (Net % change in sequestration from BAU at Year 300) - Percent change from Baseline for six alternative statewide management scenarios. Negative numbers indicate less sequestration than the baseline (i.e. net emission) (there's values for without product substitution consideration but I did not input them here)	N/A	N/A	1. Most studies of biomass GHG emissions assume that wood displaces fossil fuel energy sources (Buchholz et al., 2016). This assumption may not always hold, particularly where other renewable energy sources may be diminished by the promotion of stand-alone biomass electric power generation in renewable energy policy. If the use of RECs by stand-alone biomass power causes the dis- placement of ren…	N/A	N/A	N/A	1. All increased intensity scenarios reduced net sequestration com- pared with the Baseline at Year 100 (ranging from −8to −30 per cent; Table 6). At year 300, net sequestration was still reduced, but slightly less than year 100 in each case 2. Decreasing the intensity of management across the landscape generally resulted in greater C storage in the long term. The best performing scenario from a …	1. Scenarios that increase the area of no harvest set asides compared favourably with baseline GHG emissions predicted for reduced harvesting intensity scenarios when ***product substitution was not considered***. The sensitivity of results to inclusion or exclusion of GHG pools, such as avoided emissions through product substitution, illustrates the importance of assumptions when evaluating comp…	N/A
3	Gunn & Buchholz	Forest sector greenhouse gas emissions sensitivity to changes in forest management in Maine (USA)	2018	Life cycle carbon accounting	1. We used a life cycle greenhouse gas (GHG) accounting tool to test the sensitivity of Maine’s state-wide forest sector GHG emissions to changes in forest management; We used a comprehensive life cycle GHG accounting tool developed for Maine (Hennigar et al., 2013) to evaluate the implications of shifts to greater and lesser forest management intensity from the current baseline set of management…	Mild	1. Defining a baseline is particularly perplexing in themidst a dynamic economy where the recent past may not be a good predictor of the future.	Maine, USA	N/A	Yes	Attributional	roots, stem, crown, litter + wood products	1. C pools included: (1) storage in above- and below-ground live and dead biomass; (2) storage in forest products in use and in landfills; (3) harvest, transport, and manufacturing emissions; (4) avoided emissions (substitution, bioenergy); and (5) landfill methane fluxes. 2. We did not track the soil C pool because FIA plot input data used in ForGATE do not include this pool.	N/A	N/A	N/A	The FVS-NE simulations used to generate lookup tables in the ForGATE tool did not account for natural disturbances or climate change impacts that would undoubtedly play a role in these long-term projections	N/A	1. Continuation of the baseline forest sector was a net GHG sink throughout the 300-year modelling period. Increasing management intensity through greater use of even-aged management increased total emissions compared with the baseline. 2. We defined Baseline forest condition based upon US Forest Service FIA statewide data. FIA data are derived from a continuous forest inventory system on a 5-yea…	100-Year clearcut - putting more forest area into even-aged systems that used clearcutting as the regeneration method (i.e. increase from 3.85 per cent in Baseline to 51.99 per cent in each clearcut scenario	Wood products and bioenergy	N/A	N/A	N/A	Used	1. Emissions pools asso- ciated with GHG emissions that are potentially avoided from the use of wood to substitute for fossil energy production and the use of wood to substitute for C-intensive building products such as concrete and steel are also estimated. 2. (there's values for without product substitution consideration but I did not input them here) 3. For example, if timber use in the constr…	Discussed but not quantified	N/A	N/A	Negative	N/A	300 years	N/A	1. The FVS-NE simulations used to generate lookup tables in the ForGATE tool did not account for natural disturbances or climate change impacts that would undoubtedly play a role in these long-term projections	1. Additionally, 14 per cent of the landfill wood is used for energy (Heath et al.,2010) and 49 per cent of methane captured at landfills is also used for energy	1. We held assumptions constant in the alternative scenario for all operations, manufacturing and end use emissions vari- ables (including landfill management). Only the silvicultural regimes were modified from the Baseline to evaluate the impacts of alternative forest management scenarios. 2. We assumed that 20 per cent of the harvests in each year used tree tops and limbs (harvest residues) for…	-17% (Net % change in sequestration from BAU at Year 300) - Percent change from Baseline for six alternative statewide management scenarios. Negative numbers indicate less sequestration than the baseline (i.e. net emission) (there's values for without product substitution consideration but I did not input them here)	N/A	N/A	1. Most studies of biomass GHG emissions assume that wood displaces fossil fuel energy sources (Buchholz et al., 2016). This assumption may not always hold, particularly where other renewable energy sources may be diminished by the promotion of stand-alone biomass electric power generation in renewable energy policy. If the use of RECs by stand-alone biomass power causes the dis- placement of ren…	N/A	N/A	N/A	1. All increased intensity scenarios reduced net sequestration com- pared with the Baseline at Year 100 (ranging from −8to −30 per cent; Table 6). At year 300, net sequestration was still reduced, but slightly less than year 100 in each case 2. Decreasing the intensity of management across the landscape generally resulted in greater C storage in the long term. The best performing scenario from a …	1. Scenarios that increase the area of no harvest set asides compared favourably with baseline GHG emissions predicted for reduced harvesting intensity scenarios when ***product substitution was not considered***. The sensitivity of results to inclusion or exclusion of GHG pools, such as avoided emissions through product substitution, illustrates the importance of assumptions when evaluating comp…	N/A
3	Gunn & Buchholz	Forest sector greenhouse gas emissions sensitivity to changes in forest management in Maine (USA)	2018	Life cycle carbon accounting	1. We used a life cycle greenhouse gas (GHG) accounting tool to test the sensitivity of Maine’s state-wide forest sector GHG emissions to changes in forest management; We used a comprehensive life cycle GHG accounting tool developed for Maine (Hennigar et al., 2013) to evaluate the implications of shifts to greater and lesser forest management intensity from the current baseline set of management…	Mild	1. Defining a baseline is particularly perplexing in themidst a dynamic economy where the recent past may not be a good predictor of the future.	Maine, USA	N/A	Yes	Attributional	roots, stem, crown, litter + wood products	1. C pools included: (1) storage in above- and below-ground live and dead biomass; (2) storage in forest products in use and in landfills; (3) harvest, transport, and manufacturing emissions; (4) avoided emissions (substitution, bioenergy); and (5) landfill methane fluxes. 2. We did not track the soil C pool because FIA plot input data used in ForGATE do not include this pool.	N/A	N/A	N/A	The FVS-NE simulations used to generate lookup tables in the ForGATE tool did not account for natural disturbances or climate change impacts that would undoubtedly play a role in these long-term projections	N/A	1. Continuation of the baseline forest sector was a net GHG sink throughout the 300-year modelling period. Increasing management intensity through greater use of even-aged management increased total emissions compared with the baseline. 2. We defined Baseline forest condition based upon US Forest Service FIA statewide data. FIA data are derived from a continuous forest inventory system on a 5-yea…	60-Year clearcut - putting more forest area into even-aged systems that used clearcutting as the regeneration method (i.e. increase from 3.85 per cent in Baseline to 51.99 per cent in each clearcut scenario	Wood products and bioenergy	N/A	N/A	N/A	Used	1. Emissions pools asso- ciated with GHG emissions that are potentially avoided from the use of wood to substitute for fossil energy production and the use of wood to substitute for C-intensive building products such as concrete and steel are also estimated. 2. (there's values for without product substitution consideration but I did not input them here) 3. For example, if timber use in the constr…	Discussed but not quantified	N/A	N/A	Negative	N/A	300 years	N/A	1. The FVS-NE simulations used to generate lookup tables in the ForGATE tool did not account for natural disturbances or climate change impacts that would undoubtedly play a role in these long-term projections	1. Additionally, 14 per cent of the landfill wood is used for energy (Heath et al.,2010) and 49 per cent of methane captured at landfills is also used for energy	1. We held assumptions constant in the alternative scenario for all operations, manufacturing and end use emissions vari- ables (including landfill management). Only the silvicultural regimes were modified from the Baseline to evaluate the impacts of alternative forest management scenarios. 2. We assumed that 20 per cent of the harvests in each year used tree tops and limbs (harvest residues) for…	-22% (Net % change in sequestration from BAU at Year 300) - Percent change from Baseline for six alternative statewide management scenarios. Negative numbers indicate less sequestration than the baseline (i.e. net emission) (there's values for without product substitution consideration but I did not input them here)	N/A	N/A	1. Most studies of biomass GHG emissions assume that wood displaces fossil fuel energy sources (Buchholz et al., 2016). This assumption may not always hold, particularly where other renewable energy sources may be diminished by the promotion of stand-alone biomass electric power generation in renewable energy policy. If the use of RECs by stand-alone biomass power causes the dis- placement of ren…	N/A	N/A	N/A	1. All increased intensity scenarios reduced net sequestration com- pared with the Baseline at Year 100 (ranging from −8to −30 per cent; Table 6). At year 300, net sequestration was still reduced, but slightly less than year 100 in each case 2. Decreasing the intensity of management across the landscape generally resulted in greater C storage in the long term. The best performing scenario from a …	1. Scenarios that increase the area of no harvest set asides compared favourably with baseline GHG emissions predicted for reduced harvesting intensity scenarios when ***product substitution was not considered***. The sensitivity of results to inclusion or exclusion of GHG pools, such as avoided emissions through product substitution, illustrates the importance of assumptions when evaluating comp…	N/A
3	Gunn & Buchholz	Forest sector greenhouse gas emissions sensitivity to changes in forest management in Maine (USA)	2018	Life cycle carbon accounting	1. We used a life cycle greenhouse gas (GHG) accounting tool to test the sensitivity of Maine’s state-wide forest sector GHG emissions to changes in forest management; We used a comprehensive life cycle GHG accounting tool developed for Maine (Hennigar et al., 2013) to evaluate the implications of shifts to greater and lesser forest management intensity from the current baseline set of management…	Mild	1. Defining a baseline is particularly perplexing in themidst a dynamic economy where the recent past may not be a good predictor of the future.	Maine, USA	N/A	Yes	Attributional	roots, stem, crown, litter + wood products	1. C pools included: (1) storage in above- and below-ground live and dead biomass; (2) storage in forest products in use and in landfills; (3) harvest, transport, and manufacturing emissions; (4) avoided emissions (substitution, bioenergy); and (5) landfill methane fluxes. 2. We did not track the soil C pool because FIA plot input data used in ForGATE do not include this pool.	N/A	N/A	N/A	The FVS-NE simulations used to generate lookup tables in the ForGATE tool did not account for natural disturbances or climate change impacts that would undoubtedly play a role in these long-term projections	N/A	1. Continuation of the baseline forest sector was a net GHG sink throughout the 300-year modelling period. Increasing management intensity through greater use of even-aged management increased total emissions compared with the baseline. 2. We defined Baseline forest condition based upon US Forest Service FIA statewide data. FIA data are derived from a continuous forest inventory system on a 5-yea…	Heavy harvest -shifting Baseline area from the clearcut and uneven-aged regimes into the heavy harvest silvicultural regime	Wood products and bioenergy	N/A	N/A	N/A	Used	1. Emissions pools asso- ciated with GHG emissions that are potentially avoided from the use of wood to substitute for fossil energy production and the use of wood to substitute for C-intensive building products such as concrete and steel are also estimated. 2. (there's values for without product substitution consideration but I did not input them here) 3. For example, if timber use in the constr…	Discussed but not quantified	N/A	N/A	Negative	N/A	300 years	N/A	1. The FVS-NE simulations used to generate lookup tables in the ForGATE tool did not account for natural disturbances or climate change impacts that would undoubtedly play a role in these long-term projections	1. Additionally, 14 per cent of the landfill wood is used for energy (Heath et al.,2010) and 49 per cent of methane captured at landfills is also used for energy	1. We held assumptions constant in the alternative scenario for all operations, manufacturing and end use emissions vari- ables (including landfill management). Only the silvicultural regimes were modified from the Baseline to evaluate the impacts of alternative forest management scenarios. 2. We assumed that 20 per cent of the harvests in each year used tree tops and limbs (harvest residues) for…	-5% (Net % change in sequestration from BAU at Year 300) - Percent change from Baseline for six alternative statewide management scenarios. Negative numbers indicate less sequestration than the baseline (i.e. net emission) (there's values for without product substitution consideration but I did not input them here)	N/A	N/A	1. Most studies of biomass GHG emissions assume that wood displaces fossil fuel energy sources (Buchholz et al., 2016). This assumption may not always hold, particularly where other renewable energy sources may be diminished by the promotion of stand-alone biomass electric power generation in renewable energy policy. If the use of RECs by stand-alone biomass power causes the dis- placement of ren…	N/A	N/A	N/A	1. All increased intensity scenarios reduced net sequestration com- pared with the Baseline at Year 100 (ranging from −8to −30 per cent; Table 6). At year 300, net sequestration was still reduced, but slightly less than year 100 in each case 2. Decreasing the intensity of management across the landscape generally resulted in greater C storage in the long term. The best performing scenario from a …	1. Scenarios that increase the area of no harvest set asides compared favourably with baseline GHG emissions predicted for reduced harvesting intensity scenarios when ***product substitution was not considered***. The sensitivity of results to inclusion or exclusion of GHG pools, such as avoided emissions through product substitution, illustrates the importance of assumptions when evaluating comp…	N/A
3	Gustavsson	Climate change effects of forestry and substitution of carbon-intensive materials and fossil fuels	2017	Carbon flux / Emissions accounting	1. We estimate the climate effects of directing forest management in Sweden towards increased carbon storage in forests with more land set-aside for protection, or towards increased forest production for the substitution of carbon-intensive materials and fossil fuels, relative to a reference case of current forest management. 2. We develop various scenarios of forest management and biomass use to…	Sustainable Industrial	1. In this study we have not considered the potential effects on forest growth of extracting harvest residues. 2. In our analyses, we do not consider potential effects of albedo changes. Changes in land surface albedo (reflectivity), e.g. between forested and harvested land, may change the balance of solar radiation and hence radiative forcing, particularly in boreal forest regions such as Sweden…	Sweden	N/A	No	N/A	living biomass, soil C, harvested biomass	N/A	N/A	N/A	N/A	N/A	N/A	The BAU scenario with 8 TWh of forest fuel extraction (BAU 8TWh) is considered as the reference case against which all other scenarios are compared; 8 TWh represents annual harvest of 8 TWh of logging residues ∆Emissions = ∆NEE+∆ Building+∆ Bioenergy+∆ Fossil +∆Operations where ∆NEE is the NEE of the selected scenario minus that of the BAU 8TWh scenario, ∆Building is the building-related emission…	BAU (8 TWh) - base scenario	1. Small-diameter stemwood is typically used as pulpwood for paper production.We assume that the same amount of pulpwood is delivered to society in all scenarios. The least amount of small- diameter stemwood is harvested in the Set-aside scenario, and this amount of pulpwood supply is assumed to be maintained in all other scenarios. The additional small-diameter stemwood that is harvested in the …	80 years	1. We assume a building service life of 80 years	N/A	Yes	1. The supply of forest biomass for the substitution of fossil energy and carbon intensive materials provide a continuing long term climate benefit, but with a lower average carbon stock in the forest. In the case of energy and material substitution, the climate benefits take place over many years, depending on the biomass production and utilization patterns, and which fossil systems are replaced…	N/A	1. The use of fertilization was determined by a series of default set- tings for site types, interval, site productivity, age, and mean height	N/A	N/A	N/A	100 years	1. The current Swedish harvest of forest residues in thinnings and final fellings is about 8 TWh per year, which is based on an esti- mate made by the Swedish Forest Agency [60]. The area from which forest residues were removed in 2005 was multiplied by a recovery rate of 30 dry tons per hectare, corresponding to about 8 TWh per year. This harvest level is used as reference for all scenarios. we …	1. In this analysis we used the RCP4.5 climate change scenario. The RCP4.5 scenario is estimated to increase the mean temperature during the growing season by about 2 °C by 2100, and in the simulations this results in an increased forest growth of 5% after 15 years and 21% after 100 years, compared to no climate change.	1. For buildings: In this study, our end-of-life management scenarios and analytical approach are based on Dodoo et al. [9], and assume that steel is recycled as scrap for production of new steel, concrete is crushed into aggregate, exposed to the atmosphere to increase carbonation and then used for below-ground filling, and wood is recovered and used to replace fossil energy. We assume that 100%…	1. The BAU scenario reflects current forestry practices, with exception of the harvest level, which was largely kept at the same level as the growth. This does not cor- respond to present or historical harvest levels, which during the latest 10 years have varied between 70–85% of the total annual growth	0 change in average annual CO2 emissions (million t CO2 per year) over 100 years from forest system components under different forest scenarios with main energy and building alternatives, relative to BAU 8 TWh baseline. Positive values represent net emissions to the atmosphere; negative values represent uptake or avoided emissions	N/A	N/A	1. In contrast, the supply of forest biomass for the substitution of fossil energy and carbon intensive materials provide a continuing long term climate benefit, but with a lower average carbon stock in the forest. In the case of energy and material substitution, the climate benefits take place over many years, depending on the biomass production and utilization patterns, and which fossil systems…	1. For all scenarios, as forest residue harvest intensity in- creases, the total cumulative CO2 emission decreases 2. As more biomass residues are recovered and used for bioenergy, the bigger is the climate benefit	N/A	1. The climate benefit of forest carbon storage decreases with time, since net forest growth declines in aging forests, leading to diminishing removals of carbon dioxide (CO2) from the atmosphere	1. The scenario with increased set-aside area and the current level of forest residue harvest resulted in lower cumulative carbon emissions compared to the reference case for the first 90 years, but then showed higher emissions as reduced forest harvest led to higher carbon emissions from energy and material systems. For the reference case of current forest management, increased harvest of forest…	N/A	N/A
3	Gustavsson	Climate change effects of forestry and substitution of carbon-intensive materials and fossil fuels	2017	Carbon flux / Emissions accounting	1. We estimate the climate effects of directing forest management in Sweden towards increased carbon storage in forests with more land set-aside for protection, or towards increased forest production for the substitution of carbon-intensive materials and fossil fuels, relative to a reference case of current forest management. 2. We develop various scenarios of forest management and biomass use to…	Sustainable Industrial	1. In this study we have not considered the potential effects on forest growth of extracting harvest residues. 2. In our analyses, we do not consider potential effects of albedo changes. Changes in land surface albedo (reflectivity), e.g. between forested and harvested land, may change the balance of solar radiation and hence radiative forcing, particularly in boreal forest regions such as Sweden…	Sweden	N/A	No	N/A	living biomass, soil C, harvested biomass	N/A	N/A	N/A	N/A	N/A	N/A	The BAU scenario with 8 TWh of forest fuel extraction (BAU 8TWh) is considered as the reference case against which all other scenarios are compared; 8 TWh represents annual harvest of 8 TWh of logging residues ∆Emissions = ∆NEE+∆ Building+∆ Bioenergy+∆ Fossil +∆Operations where ∆NEE is the NEE of the selected scenario minus that of the BAU 8TWh scenario, ∆Building is the building-related emission…	BAU 80/50 - 80% slash + 50% thinning; 80/50 represents harvest of 80% of slash from final fellings and 50% of slash from thinnings	1. Small-diameter stemwood is typically used as pulpwood for paper production.We assume that the same amount of pulpwood is delivered to society in all scenarios. The least amount of small- diameter stemwood is harvested in the Set-aside scenario, and this amount of pulpwood supply is assumed to be maintained in all other scenarios. The additional small-diameter stemwood that is harvested in the …	80 years	1. We assume a building service life of 80 years	N/A	Yes	1. The supply of forest biomass for the substitution of fossil energy and carbon intensive materials provide a continuing long term climate benefit, but with a lower average carbon stock in the forest. In the case of energy and material substitution, the climate benefits take place over many years, depending on the biomass production and utilization patterns, and which fossil systems are replaced…	N/A	1. The use of fertilization was determined by a series of default set- tings for site types, interval, site productivity, age, and mean height	N/A	N/A	N/A	100 years	1. The current Swedish harvest of forest residues in thinnings and final fellings is about 8 TWh per year, which is based on an esti- mate made by the Swedish Forest Agency [60]. The area from which forest residues were removed in 2005 was multiplied by a recovery rate of 30 dry tons per hectare, corresponding to about 8 TWh per year. This harvest level is used as reference for all scenarios. we …	1. In this analysis we used the RCP4.5 climate change scenario. The RCP4.5 scenario is estimated to increase the mean temperature during the growing season by about 2 °C by 2100, and in the simulations this results in an increased forest growth of 5% after 15 years and 21% after 100 years, compared to no climate change.	1. For buildings: In this study, our end-of-life management scenarios and analytical approach are based on Dodoo et al. [9], and assume that steel is recycled as scrap for production of new steel, concrete is crushed into aggregate, exposed to the atmosphere to increase carbonation and then used for below-ground filling, and wood is recovered and used to replace fossil energy. We assume that 100%…	1. The BAU scenario reflects current forestry practices, with exception of the harvest level, which was largely kept at the same level as the growth. This does not cor- respond to present or historical harvest levels, which during the latest 10 years have varied between 70–85% of the total annual growth	-7.22 change in average annual CO2 emissions (million t CO2 per year) over 100 years from forest system components under different forest scenarios with main energy and building alternatives, relative to BAU 8 TWh baseline. Positive values represent net emissions to the atmosphere; negative values represent uptake or avoided emissions	N/A	N/A	1. In contrast, the supply of forest biomass for the substitution of fossil energy and carbon intensive materials provide a continuing long term climate benefit, but with a lower average carbon stock in the forest. In the case of energy and material substitution, the climate benefits take place over many years, depending on the biomass production and utilization patterns, and which fossil systems…	1. For all scenarios, as forest residue harvest intensity in- creases, the total cumulative CO2 emission decreases 2. As more biomass residues are recovered and used for bioenergy, the bigger is the climate benefit	N/A	1. The climate benefit of forest carbon storage decreases with time, since net forest growth declines in aging forests, leading to diminishing removals of carbon dioxide (CO2) from the atmosphere	1. The scenario with increased set-aside area and the current level of forest residue harvest resulted in lower cumulative carbon emissions compared to the reference case for the first 90 years, but then showed higher emissions as reduced forest harvest led to higher carbon emissions from energy and material systems. For the reference case of current forest management, increased harvest of forest…	N/A	N/A
3	Gustavsson	Climate change effects of forestry and substitution of carbon-intensive materials and fossil fuels	2017	Carbon flux / Emissions accounting	1. We estimate the climate effects of directing forest management in Sweden towards increased carbon storage in forests with more land set-aside for protection, or towards increased forest production for the substitution of carbon-intensive materials and fossil fuels, relative to a reference case of current forest management. 2. We develop various scenarios of forest management and biomass use to…	Sustainable Industrial	1. In this study we have not considered the potential effects on forest growth of extracting harvest residues. 2. In our analyses, we do not consider potential effects of albedo changes. Changes in land surface albedo (reflectivity), e.g. between forested and harvested land, may change the balance of solar radiation and hence radiative forcing, particularly in boreal forest regions such as Sweden…	Sweden	N/A	No	N/A	living biomass, soil C, harvested biomass	N/A	N/A	N/A	N/A	N/A	N/A	The BAU scenario with 8 TWh of forest fuel extraction (BAU 8TWh) is considered as the reference case against which all other scenarios are compared; 8 TWh represents annual harvest of 8 TWh of logging residues ∆Emissions = ∆NEE+∆ Building+∆ Bioenergy+∆ Fossil +∆Operations where ∆NEE is the NEE of the selected scenario minus that of the BAU 8TWh scenario, ∆Building is the building-related emission…	BAU 80/50/50 - 80% slash + 50% thinning + 50% stumps; 80/50/50 represents the same slash harvest plus 50% harvest of stumps from final fellings	1. Small-diameter stemwood is typically used as pulpwood for paper production.We assume that the same amount of pulpwood is delivered to society in all scenarios. The least amount of small- diameter stemwood is harvested in the Set-aside scenario, and this amount of pulpwood supply is assumed to be maintained in all other scenarios. The additional small-diameter stemwood that is harvested in the …	80 years	1. We assume a building service life of 80 years	N/A	Yes	1. The supply of forest biomass for the substitution of fossil energy and carbon intensive materials provide a continuing long term climate benefit, but with a lower average carbon stock in the forest. In the case of energy and material substitution, the climate benefits take place over many years, depending on the biomass production and utilization patterns, and which fossil systems are replaced…	N/A	1. The use of fertilization was determined by a series of default set- tings for site types, interval, site productivity, age, and mean height	N/A	N/A	N/A	100 years	1. The current Swedish harvest of forest residues in thinnings and final fellings is about 8 TWh per year, which is based on an esti- mate made by the Swedish Forest Agency [60]. The area from which forest residues were removed in 2005 was multiplied by a recovery rate of 30 dry tons per hectare, corresponding to about 8 TWh per year. This harvest level is used as reference for all scenarios. we …	1. In this analysis we used the RCP4.5 climate change scenario. The RCP4.5 scenario is estimated to increase the mean temperature during the growing season by about 2 °C by 2100, and in the simulations this results in an increased forest growth of 5% after 15 years and 21% after 100 years, compared to no climate change.	1. For buildings: In this study, our end-of-life management scenarios and analytical approach are based on Dodoo et al. [9], and assume that steel is recycled as scrap for production of new steel, concrete is crushed into aggregate, exposed to the atmosphere to increase carbonation and then used for below-ground filling, and wood is recovered and used to replace fossil energy. We assume that 100%…	1. The BAU scenario reflects current forestry practices, with exception of the harvest level, which was largely kept at the same level as the growth. This does not cor- respond to present or historical harvest levels, which during the latest 10 years have varied between 70–85% of the total annual growth	-11.61 change in average annual CO2 emissions (million t CO2 per year) over 100 years from forest system components under different forest scenarios with main energy and building alternatives, relative to BAU 8 TWh baseline. Positive values represent net emissions to the atmosphere; negative values represent uptake or avoided emissions	N/A	N/A	1. In contrast, the supply of forest biomass for the substitution of fossil energy and carbon intensive materials provide a continuing long term climate benefit, but with a lower average carbon stock in the forest. In the case of energy and material substitution, the climate benefits take place over many years, depending on the biomass production and utilization patterns, and which fossil systems…	1. For all scenarios, as forest residue harvest intensity in- creases, the total cumulative CO2 emission decreases 2. As more biomass residues are recovered and used for bioenergy, the bigger is the climate benefit	N/A	1. The climate benefit of forest carbon storage decreases with time, since net forest growth declines in aging forests, leading to diminishing removals of carbon dioxide (CO2) from the atmosphere	1. The scenario with increased set-aside area and the current level of forest residue harvest resulted in lower cumulative carbon emissions compared to the reference case for the first 90 years, but then showed higher emissions as reduced forest harvest led to higher carbon emissions from energy and material systems. For the reference case of current forest management, increased harvest of forest…	N/A	N/A
3	Gustavsson	Climate change effects of forestry and substitution of carbon-intensive materials and fossil fuels	2017	Carbon flux / Emissions accounting	1. We estimate the climate effects of directing forest management in Sweden towards increased carbon storage in forests with more land set-aside for protection, or towards increased forest production for the substitution of carbon-intensive materials and fossil fuels, relative to a reference case of current forest management. 2. We develop various scenarios of forest management and biomass use to…	Sustainable Industrial	1. In this study we have not considered the potential effects on forest growth of extracting harvest residues. 2. In our analyses, we do not consider potential effects of albedo changes. Changes in land surface albedo (reflectivity), e.g. between forested and harvested land, may change the balance of solar radiation and hence radiative forcing, particularly in boreal forest regions such as Sweden…	Sweden	N/A	No	N/A	living biomass, soil C, harvested biomass	N/A	N/A	N/A	N/A	N/A	N/A	The BAU scenario with 8 TWh of forest fuel extraction (BAU 8TWh) is considered as the reference case against which all other scenarios are compared; 8 TWh represents annual harvest of 8 TWh of logging residues ∆Emissions = ∆NEE+∆ Building+∆ Bioenergy+∆ Fossil +∆Operations where ∆NEE is the NEE of the selected scenario minus that of the BAU 8TWh scenario, ∆Building is the building-related emission…	Set-aside - 0 TWh, no extraction of forest residues	1. Small-diameter stemwood is typically used as pulpwood for paper production.We assume that the same amount of pulpwood is delivered to society in all scenarios. The least amount of small- diameter stemwood is harvested in the Set-aside scenario, and this amount of pulpwood supply is assumed to be maintained in all other scenarios. The additional small-diameter stemwood that is harvested in the …	80 years	1. We assume a building service life of 80 years	N/A	Yes	1. The supply of forest biomass for the substitution of fossil energy and carbon intensive materials provide a continuing long term climate benefit, but with a lower average carbon stock in the forest. In the case of energy and material substitution, the climate benefits take place over many years, depending on the biomass production and utilization patterns, and which fossil systems are replaced…	N/A	1. The use of fertilization was determined by a series of default set- tings for site types, interval, site productivity, age, and mean height	N/A	N/A	N/A	100 years	1. The current Swedish harvest of forest residues in thinnings and final fellings is about 8 TWh per year, which is based on an esti- mate made by the Swedish Forest Agency [60]. The area from which forest residues were removed in 2005 was multiplied by a recovery rate of 30 dry tons per hectare, corresponding to about 8 TWh per year. This harvest level is used as reference for all scenarios. we …	1. In this analysis we used the RCP4.5 climate change scenario. The RCP4.5 scenario is estimated to increase the mean temperature during the growing season by about 2 °C by 2100, and in the simulations this results in an increased forest growth of 5% after 15 years and 21% after 100 years, compared to no climate change.	1. For buildings: In this study, our end-of-life management scenarios and analytical approach are based on Dodoo et al. [9], and assume that steel is recycled as scrap for production of new steel, concrete is crushed into aggregate, exposed to the atmosphere to increase carbonation and then used for below-ground filling, and wood is recovered and used to replace fossil energy. We assume that 100%…	1. In the Set-aside scenario the protected area was doubled at the beginning year and then kept constant during the simulation, while all other settings were equal to BAU	1.65 change in average annual CO2 emissions (million t CO2 per year) over 100 years from forest system components under different forest scenarios with main energy and building alternatives, relative to BAU 8 TWh baseline. Positive values represent net emissions to the atmosphere; negative values represent uptake or avoided emissions	N/A	N/A	1. In contrast, the supply of forest biomass for the substitution of fossil energy and carbon intensive materials provide a continuing long term climate benefit, but with a lower average carbon stock in the forest. In the case of energy and material substitution, the climate benefits take place over many years, depending on the biomass production and utilization patterns, and which fossil systems…	1. For all scenarios, as forest residue harvest intensity in- creases, the total cumulative CO2 emission decreases 2. As more biomass residues are recovered and used for bioenergy, the bigger is the climate benefit	N/A	1. The climate benefit of forest carbon storage decreases with time, since net forest growth declines in aging forests, leading to diminishing removals of carbon dioxide (CO2) from the atmosphere	1. The scenario with increased set-aside area and the current level of forest residue harvest resulted in lower cumulative carbon emissions compared to the reference case for the first 90 years, but then showed higher emissions as reduced forest harvest led to higher carbon emissions from energy and material systems. For the reference case of current forest management, increased harvest of forest…	N/A	N/A
3	Gustavsson	Climate change effects of forestry and substitution of carbon-intensive materials and fossil fuels	2017	Carbon flux / Emissions accounting	1. We estimate the climate effects of directing forest management in Sweden towards increased carbon storage in forests with more land set-aside for protection, or towards increased forest production for the substitution of carbon-intensive materials and fossil fuels, relative to a reference case of current forest management. 2. We develop various scenarios of forest management and biomass use to…	Sustainable Industrial	1. In this study we have not considered the potential effects on forest growth of extracting harvest residues. 2. In our analyses, we do not consider potential effects of albedo changes. Changes in land surface albedo (reflectivity), e.g. between forested and harvested land, may change the balance of solar radiation and hence radiative forcing, particularly in boreal forest regions such as Sweden…	Sweden	N/A	No	N/A	living biomass, soil C, harvested biomass	N/A	N/A	N/A	N/A	N/A	N/A	The BAU scenario with 8 TWh of forest fuel extraction (BAU 8TWh) is considered as the reference case against which all other scenarios are compared; 8 TWh represents annual harvest of 8 TWh of logging residues ∆Emissions = ∆NEE+∆ Building+∆ Bioenergy+∆ Fossil +∆Operations where ∆NEE is the NEE of the selected scenario minus that of the BAU 8TWh scenario, ∆Building is the building-related emission…	Set-aside 8 TWh	1. Small-diameter stemwood is typically used as pulpwood for paper production.We assume that the same amount of pulpwood is delivered to society in all scenarios. The least amount of small- diameter stemwood is harvested in the Set-aside scenario, and this amount of pulpwood supply is assumed to be maintained in all other scenarios. The additional small-diameter stemwood that is harvested in the …	80 years	1. We assume a building service life of 80 years	N/A	Yes	1. The supply of forest biomass for the substitution of fossil energy and carbon intensive materials provide a continuing long term climate benefit, but with a lower average carbon stock in the forest. In the case of energy and material substitution, the climate benefits take place over many years, depending on the biomass production and utilization patterns, and which fossil systems are replaced…	N/A	1. The use of fertilization was determined by a series of default set- tings for site types, interval, site productivity, age, and mean height	N/A	N/A	N/A	100 years	1. The current Swedish harvest of forest residues in thinnings and final fellings is about 8 TWh per year, which is based on an esti- mate made by the Swedish Forest Agency [60]. The area from which forest residues were removed in 2005 was multiplied by a recovery rate of 30 dry tons per hectare, corresponding to about 8 TWh per year. This harvest level is used as reference for all scenarios. we …	1. In this analysis we used the RCP4.5 climate change scenario. The RCP4.5 scenario is estimated to increase the mean temperature during the growing season by about 2 °C by 2100, and in the simulations this results in an increased forest growth of 5% after 15 years and 21% after 100 years, compared to no climate change.	1. For buildings: In this study, our end-of-life management scenarios and analytical approach are based on Dodoo et al. [9], and assume that steel is recycled as scrap for production of new steel, concrete is crushed into aggregate, exposed to the atmosphere to increase carbonation and then used for below-ground filling, and wood is recovered and used to replace fossil energy. We assume that 100%…	1. In the Set-aside scenario the protected area was doubled at the beginning year and then kept constant during the simulation, while all other settings were equal to BAU	1.09 change in average annual CO2 emissions (million t CO2 per year) over 100 years from forest system components under different forest scenarios with main energy and building alternatives, relative to BAU 8 TWh baseline. Positive values represent net emissions to the atmosphere; negative values represent uptake or avoided emissions	N/A	N/A	1. In contrast, the supply of forest biomass for the substitution of fossil energy and carbon intensive materials provide a continuing long term climate benefit, but with a lower average carbon stock in the forest. In the case of energy and material substitution, the climate benefits take place over many years, depending on the biomass production and utilization patterns, and which fossil systems…	1. For all scenarios, as forest residue harvest intensity in- creases, the total cumulative CO2 emission decreases 2. As more biomass residues are recovered and used for bioenergy, the bigger is the climate benefit	N/A	1. The climate benefit of forest carbon storage decreases with time, since net forest growth declines in aging forests, leading to diminishing removals of carbon dioxide (CO2) from the atmosphere	1. The scenario with increased set-aside area and the current level of forest residue harvest resulted in lower cumulative carbon emissions compared to the reference case for the first 90 years, but then showed higher emissions as reduced forest harvest led to higher carbon emissions from energy and material systems. For the reference case of current forest management, increased harvest of forest…	N/A	N/A
4	Gustavsson	Climate change effects of forestry and substitution of carbon-intensive materials and fossil fuels	2017	Carbon flux / Emissions accounting	1. We estimate the climate effects of directing forest management in Sweden towards increased carbon storage in forests with more land set-aside for protection, or towards increased forest production for the substitution of carbon-intensive materials and fossil fuels, relative to a reference case of current forest management. 2. We develop various scenarios of forest management and biomass use to…	Sustainable Industrial	1. In this study we have not considered the potential effects on forest growth of extracting harvest residues. 2. In our analyses, we do not consider potential effects of albedo changes. Changes in land surface albedo (reflectivity), e.g. between forested and harvested land, may change the balance of solar radiation and hence radiative forcing, particularly in boreal forest regions such as Sweden…	Sweden	N/A	No	N/A	living biomass, soil C, harvested biomass	N/A	N/A	N/A	N/A	N/A	N/A	The BAU scenario with 8 TWh of forest fuel extraction (BAU 8TWh) is considered as the reference case against which all other scenarios are compared; 8 TWh represents annual harvest of 8 TWh of logging residues ∆Emissions = ∆NEE+∆ Building+∆ Bioenergy+∆ Fossil +∆Operations where ∆NEE is the NEE of the selected scenario minus that of the BAU 8TWh scenario, ∆Building is the building-related emission…	Set-aside 80/50	1. Small-diameter stemwood is typically used as pulpwood for paper production.We assume that the same amount of pulpwood is delivered to society in all scenarios. The least amount of small- diameter stemwood is harvested in the Set-aside scenario, and this amount of pulpwood supply is assumed to be maintained in all other scenarios. The additional small-diameter stemwood that is harvested in the …	80 years	1. We assume a building service life of 80 years	N/A	Yes	1. The supply of forest biomass for the substitution of fossil energy and carbon intensive materials provide a continuing long term climate benefit, but with a lower average carbon stock in the forest. In the case of energy and material substitution, the climate benefits take place over many years, depending on the biomass production and utilization patterns, and which fossil systems are replaced…	N/A	1. The use of fertilization was determined by a series of default set- tings for site types, interval, site productivity, age, and mean height	N/A	N/A	N/A	100 years	1. The current Swedish harvest of forest residues in thinnings and final fellings is about 8 TWh per year, which is based on an esti- mate made by the Swedish Forest Agency [60]. The area from which forest residues were removed in 2005 was multiplied by a recovery rate of 30 dry tons per hectare, corresponding to about 8 TWh per year. This harvest level is used as reference for all scenarios. we …	1. In this analysis we used the RCP4.5 climate change scenario. The RCP4.5 scenario is estimated to increase the mean temperature during the growing season by about 2 °C by 2100, and in the simulations this results in an increased forest growth of 5% after 15 years and 21% after 100 years, compared to no climate change.	1. For buildings: In this study, our end-of-life management scenarios and analytical approach are based on Dodoo et al. [9], and assume that steel is recycled as scrap for production of new steel, concrete is crushed into aggregate, exposed to the atmosphere to increase carbonation and then used for below-ground filling, and wood is recovered and used to replace fossil energy. We assume that 100%…	1. In the Set-aside scenario the protected area was doubled at the beginning year and then kept constant during the simulation, while all other settings were equal to BAU	-4.05 change in average annual CO2 emissions (million t CO2 per year) over 100 years from forest system components under different forest scenarios with main energy and building alternatives, relative to BAU 8 TWh baseline. Positive values represent net emissions to the atmosphere; negative values represent uptake or avoided emissions	N/A	N/A	1. In contrast, the supply of forest biomass for the substitution of fossil energy and carbon intensive materials provide a continuing long term climate benefit, but with a lower average carbon stock in the forest. In the case of energy and material substitution, the climate benefits take place over many years, depending on the biomass production and utilization patterns, and which fossil systems…	1. For all scenarios, as forest residue harvest intensity in- creases, the total cumulative CO2 emission decreases 2. As more biomass residues are recovered and used for bioenergy, the bigger is the climate benefit	N/A	1. The climate benefit of forest carbon storage decreases with time, since net forest growth declines in aging forests, leading to diminishing removals of carbon dioxide (CO2) from the atmosphere	1. The scenario with increased set-aside area and the current level of forest residue harvest resulted in lower cumulative carbon emissions compared to the reference case for the first 90 years, but then showed higher emissions as reduced forest harvest led to higher carbon emissions from energy and material systems. For the reference case of current forest management, increased harvest of forest…	N/A	N/A
4	Gustavsson	Climate change effects of forestry and substitution of carbon-intensive materials and fossil fuels	2017	Carbon flux / Emissions accounting	1. We estimate the climate effects of directing forest management in Sweden towards increased carbon storage in forests with more land set-aside for protection, or towards increased forest production for the substitution of carbon-intensive materials and fossil fuels, relative to a reference case of current forest management. 2. We develop various scenarios of forest management and biomass use to…	Sustainable Industrial	1. In this study we have not considered the potential effects on forest growth of extracting harvest residues. 2. In our analyses, we do not consider potential effects of albedo changes. Changes in land surface albedo (reflectivity), e.g. between forested and harvested land, may change the balance of solar radiation and hence radiative forcing, particularly in boreal forest regions such as Sweden…	Sweden	N/A	No	N/A	living biomass, soil C, harvested biomass	N/A	N/A	N/A	N/A	N/A	N/A	The BAU scenario with 8 TWh of forest fuel extraction (BAU 8TWh) is considered as the reference case against which all other scenarios are compared; 8 TWh represents annual harvest of 8 TWh of logging residues ∆Emissions = ∆NEE+∆ Building+∆ Bioenergy+∆ Fossil +∆Operations where ∆NEE is the NEE of the selected scenario minus that of the BAU 8TWh scenario, ∆Building is the building-related emission…	Production 8TWh	1. Small-diameter stemwood is typically used as pulpwood for paper production.We assume that the same amount of pulpwood is delivered to society in all scenarios. The least amount of small- diameter stemwood is harvested in the Set-aside scenario, and this amount of pulpwood supply is assumed to be maintained in all other scenarios. The additional small-diameter stemwood that is harvested in the …	80 years	1. We assume a building service life of 80 years	N/A	Yes	1. The supply of forest biomass for the substitution of fossil energy and carbon intensive materials provide a continuing long term climate benefit, but with a lower average carbon stock in the forest. In the case of energy and material substitution, the climate benefits take place over many years, depending on the biomass production and utilization patterns, and which fossil systems are replaced…	N/A	1. The use of fertilization was determined by a series of default set- tings for site types, interval, site productivity, age, and mean height	N/A	N/A	N/A	100 years	1. The current Swedish harvest of forest residues in thinnings and final fellings is about 8 TWh per year, which is based on an esti- mate made by the Swedish Forest Agency [60]. The area from which forest residues were removed in 2005 was multiplied by a recovery rate of 30 dry tons per hectare, corresponding to about 8 TWh per year. This harvest level is used as reference for all scenarios. we …	1. In this analysis we used the RCP4.5 climate change scenario. The RCP4.5 scenario is estimated to increase the mean temperature during the growing season by about 2 °C by 2100, and in the simulations this results in an increased forest growth of 5% after 15 years and 21% after 100 years, compared to no climate change.	1. For buildings: In this study, our end-of-life management scenarios and analytical approach are based on Dodoo et al. [9], and assume that steel is recycled as scrap for production of new steel, concrete is crushed into aggregate, exposed to the atmosphere to increase carbonation and then used for below-ground filling, and wood is recovered and used to replace fossil energy. We assume that 100%…	1. In the Production scenario, no extensive or natural regeneration was used, planting of Pinus sylvestris was replaced by the faster growing Pinus contorta in 50% of the cases and the number of fertilized hectares was double that compared to the BAU scenario	-15.65 change in average annual CO2 emissions (million t CO2 per year) over 100 years from forest system components under different forest scenarios with main energy and building alternatives, relative to BAU 8 TWh baseline. Positive values represent net emissions to the atmosphere; negative values represent uptake or avoided emissions	N/A	N/A	1. In contrast, the supply of forest biomass for the substitution of fossil energy and carbon intensive materials provide a continuing long term climate benefit, but with a lower average carbon stock in the forest. In the case of energy and material substitution, the climate benefits take place over many years, depending on the biomass production and utilization patterns, and which fossil systems…	1. For all scenarios, as forest residue harvest intensity in- creases, the total cumulative CO2 emission decreases 2. As more biomass residues are recovered and used for bioenergy, the bigger is the climate benefit	N/A	1. The climate benefit of forest carbon storage decreases with time, since net forest growth declines in aging forests, leading to diminishing removals of carbon dioxide (CO2) from the atmosphere	1. The scenario with increased set-aside area and the current level of forest residue harvest resulted in lower cumulative carbon emissions compared to the reference case for the first 90 years, but then showed higher emissions as reduced forest harvest led to higher carbon emissions from energy and material systems. For the reference case of current forest management, increased harvest of forest…	N/A	N/A
4	Gustavsson	Climate change effects of forestry and substitution of carbon-intensive materials and fossil fuels	2017	Carbon flux / Emissions accounting	1. We estimate the climate effects of directing forest management in Sweden towards increased carbon storage in forests with more land set-aside for protection, or towards increased forest production for the substitution of carbon-intensive materials and fossil fuels, relative to a reference case of current forest management. 2. We develop various scenarios of forest management and biomass use to…	Sustainable Industrial	1. In this study we have not considered the potential effects on forest growth of extracting harvest residues. 2. In our analyses, we do not consider potential effects of albedo changes. Changes in land surface albedo (reflectivity), e.g. between forested and harvested land, may change the balance of solar radiation and hence radiative forcing, particularly in boreal forest regions such as Sweden…	Sweden	N/A	No	N/A	living biomass, soil C, harvested biomass	N/A	N/A	N/A	N/A	N/A	N/A	The BAU scenario with 8 TWh of forest fuel extraction (BAU 8TWh) is considered as the reference case against which all other scenarios are compared; 8 TWh represents annual harvest of 8 TWh of logging residues ∆Emissions = ∆NEE+∆ Building+∆ Bioenergy+∆ Fossil +∆Operations where ∆NEE is the NEE of the selected scenario minus that of the BAU 8TWh scenario, ∆Building is the building-related emission…	Production 80/50	1. Small-diameter stemwood is typically used as pulpwood for paper production.We assume that the same amount of pulpwood is delivered to society in all scenarios. The least amount of small- diameter stemwood is harvested in the Set-aside scenario, and this amount of pulpwood supply is assumed to be maintained in all other scenarios. The additional small-diameter stemwood that is harvested in the …	80 years	1. We assume a building service life of 80 years	N/A	Yes	1. The supply of forest biomass for the substitution of fossil energy and carbon intensive materials provide a continuing long term climate benefit, but with a lower average carbon stock in the forest. In the case of energy and material substitution, the climate benefits take place over many years, depending on the biomass production and utilization patterns, and which fossil systems are replaced…	N/A	1. The use of fertilization was determined by a series of default set- tings for site types, interval, site productivity, age, and mean height	N/A	N/A	N/A	100 years	1. The current Swedish harvest of forest residues in thinnings and final fellings is about 8 TWh per year, which is based on an esti- mate made by the Swedish Forest Agency [60]. The area from which forest residues were removed in 2005 was multiplied by a recovery rate of 30 dry tons per hectare, corresponding to about 8 TWh per year. This harvest level is used as reference for all scenarios. we …	1. In this analysis we used the RCP4.5 climate change scenario. The RCP4.5 scenario is estimated to increase the mean temperature during the growing season by about 2 °C by 2100, and in the simulations this results in an increased forest growth of 5% after 15 years and 21% after 100 years, compared to no climate change.	1. For buildings: In this study, our end-of-life management scenarios and analytical approach are based on Dodoo et al. [9], and assume that steel is recycled as scrap for production of new steel, concrete is crushed into aggregate, exposed to the atmosphere to increase carbonation and then used for below-ground filling, and wood is recovered and used to replace fossil energy. We assume that 100%…	1. In the Production scenario, no extensive or natural regeneration was used, planting of Pinus sylvestris was replaced by the faster growing Pinus contorta in 50% of the cases and the number of fertilized hectares was double that compared to the BAU scenario	-24.70 change in average annual CO2 emissions (million t CO2 per year) over 100 years from forest system components under different forest scenarios with main energy and building alternatives, relative to BAU 8 TWh baseline. Positive values represent net emissions to the atmosphere; negative values represent uptake or avoided emissions	N/A	N/A	1. In contrast, the supply of forest biomass for the substitution of fossil energy and carbon intensive materials provide a continuing long term climate benefit, but with a lower average carbon stock in the forest. In the case of energy and material substitution, the climate benefits take place over many years, depending on the biomass production and utilization patterns, and which fossil systems…	1. For all scenarios, as forest residue harvest intensity in- creases, the total cumulative CO2 emission decreases 2. As more biomass residues are recovered and used for bioenergy, the bigger is the climate benefit	N/A	1. The climate benefit of forest carbon storage decreases with time, since net forest growth declines in aging forests, leading to diminishing removals of carbon dioxide (CO2) from the atmosphere	1. The scenario with increased set-aside area and the current level of forest residue harvest resulted in lower cumulative carbon emissions compared to the reference case for the first 90 years, but then showed higher emissions as reduced forest harvest led to higher carbon emissions from energy and material systems. For the reference case of current forest management, increased harvest of forest…	N/A	N/A
4	Gustavsson	Climate change effects of forestry and substitution of carbon-intensive materials and fossil fuels	2017	Carbon flux / Emissions accounting	1. We estimate the climate effects of directing forest management in Sweden towards increased carbon storage in forests with more land set-aside for protection, or towards increased forest production for the substitution of carbon-intensive materials and fossil fuels, relative to a reference case of current forest management. 2. We develop various scenarios of forest management and biomass use to…	Sustainable Industrial	1. In this study we have not considered the potential effects on forest growth of extracting harvest residues. 2. In our analyses, we do not consider potential effects of albedo changes. Changes in land surface albedo (reflectivity), e.g. between forested and harvested land, may change the balance of solar radiation and hence radiative forcing, particularly in boreal forest regions such as Sweden…	Sweden	N/A	No	N/A	living biomass, soil C, harvested biomass	N/A	N/A	N/A	N/A	N/A	N/A	The BAU scenario with 8 TWh of forest fuel extraction (BAU 8TWh) is considered as the reference case against which all other scenarios are compared; 8 TWh represents annual harvest of 8 TWh of logging residues ∆Emissions = ∆NEE+∆ Building+∆ Bioenergy+∆ Fossil +∆Operations where ∆NEE is the NEE of the selected scenario minus that of the BAU 8TWh scenario, ∆Building is the building-related emission…	Production 80/50/50	1. Small-diameter stemwood is typically used as pulpwood for paper production.We assume that the same amount of pulpwood is delivered to society in all scenarios. The least amount of small- diameter stemwood is harvested in the Set-aside scenario, and this amount of pulpwood supply is assumed to be maintained in all other scenarios. The additional small-diameter stemwood that is harvested in the …	80 years	1. We assume a building service life of 80 years	N/A	Yes	1. The supply of forest biomass for the substitution of fossil energy and carbon intensive materials provide a continuing long term climate benefit, but with a lower average carbon stock in the forest. In the case of energy and material substitution, the climate benefits take place over many years, depending on the biomass production and utilization patterns, and which fossil systems are replaced…	N/A	1. The use of fertilization was determined by a series of default set- tings for site types, interval, site productivity, age, and mean height	N/A	N/A	N/A	100 years	1. The current Swedish harvest of forest residues in thinnings and final fellings is about 8 TWh per year, which is based on an esti- mate made by the Swedish Forest Agency [60]. The area from which forest residues were removed in 2005 was multiplied by a recovery rate of 30 dry tons per hectare, corresponding to about 8 TWh per year. This harvest level is used as reference for all scenarios. we …	1. In this analysis we used the RCP4.5 climate change scenario. The RCP4.5 scenario is estimated to increase the mean temperature during the growing season by about 2 °C by 2100, and in the simulations this results in an increased forest growth of 5% after 15 years and 21% after 100 years, compared to no climate change.	1. For buildings: In this study, our end-of-life management scenarios and analytical approach are based on Dodoo et al. [9], and assume that steel is recycled as scrap for production of new steel, concrete is crushed into aggregate, exposed to the atmosphere to increase carbonation and then used for below-ground filling, and wood is recovered and used to replace fossil energy. We assume that 100%…	1. In the Production scenario, no extensive or natural regeneration was used, planting of Pinus sylvestris was replaced by the faster growing Pinus contorta in 50% of the cases and the number of fertilized hectares was double that compared to the BAU scenario	-31.01 change in average annual CO2 emissions (million t CO2 per year) over 100 years from forest system components under different forest scenarios with main energy and building alternatives, relative to BAU 8 TWh baseline. Positive values represent net emissions to the atmosphere; negative values represent uptake or avoided emissions	N/A	N/A	1. In contrast, the supply of forest biomass for the substitution of fossil energy and carbon intensive materials provide a continuing long term climate benefit, but with a lower average carbon stock in the forest. In the case of energy and material substitution, the climate benefits take place over many years, depending on the biomass production and utilization patterns, and which fossil systems…	1. For all scenarios, as forest residue harvest intensity in- creases, the total cumulative CO2 emission decreases 2. As more biomass residues are recovered and used for bioenergy, the bigger is the climate benefit	N/A	1. The climate benefit of forest carbon storage decreases with time, since net forest growth declines in aging forests, leading to diminishing removals of carbon dioxide (CO2) from the atmosphere	1. The scenario with increased set-aside area and the current level of forest residue harvest resulted in lower cumulative carbon emissions compared to the reference case for the first 90 years, but then showed higher emissions as reduced forest harvest led to higher carbon emissions from energy and material systems. For the reference case of current forest management, increased harvest of forest…	N/A	N/A
4	Talberth	Oregon Forest Carbon Policy: Scientific and technical brief to guide legislative intervention	2017	Harvest carbon store modeling and Carbon emissions accounting	1. Implications for policy	Conservation	N/A	Oregon	N/A	No	N/A	harvested stem / C stored in wood products	N/A	Mentioned under climate change	Mentioned under climate change	Mentioned under climate change	Mentioned under climate change	Mentioned under climate change	N/A	Average emissions associated with timber harvest (ETH) averaged (Oregon)	N/A	N/A	N/A	N/A	Not used	1. The timber industry often makes the claim that reducing its harvests to protect environmental values will have the unintended consequence of increasing consumption of substitutes that have a higher carbon footprint 2. wood derived from deforestation or the conversion of old growth forests to tree plantations carries with it a high carbon footprint that lasts generations and overshadows any ben…	N/A	1. Moreover, the application of chemical herbicides and fertilizers used to suppress competing vegetation and enhance seedling growth in clearcuts generates additional carbon emissions above and beyond the emissions associated with timber harvest because they contain embodied carbon that is released into the atmosphere in a short period of time. In addition, nitrogen-based fertilizers (urea being…	N/A	Positive	1. Even if conventional clearcutting and even aged practices are used, significantly extending rotation lengths (time between harvests) can mitigate many of the adverse impacts and flip high emissions landscapes back into those that accumulate and store high densities of carbon 2. The ecological and economic benefits of long rotations have been extremely well researched and established. Curtis (1…	N/A	1. Since carbon storage and resiliency to fires, drought, floods, and pathogens is maximized in LSOG forests, anything that can be done to put existing timber plantations and other younger forests on a trajectory to eventually develop LSOG conditions is smart climate policy. Importantly, this does not mean excluding timber harvest. To the contrary, in existing plantations and other younger forest…	1. These plantations also undermine climate resiliency because they are much more susceptible to drought, disease, wildfire, floods, landslides, low summertime streamflow, thermal pollution, fish kills, regeneration failures, exotic and invasive species and other climate change-induced impacts than natural forests 2. Carbon emissions and low carbon storage are not the only climate concerns. Lands…	N/A	1. For this analysis, timber harvest emission calculations were limited to the first three sources since data on the amount, types, and frequency of chemical and fertilizer applications are lacking and since equipment and transportation emissions are generally assigned to other sectors (i.e. transportation and industrial processes) in existing greenhouse gas (GHG) inventory methods. Emissions fro…	33.03 mmt CO2-e per year between 2000 and 2015	N/A	N/A	N/A	N/A	N/A	1. establish forest carbon reserves	1. Cap and invest, forest carbon tax and reward, and an Oregon Forest Resiliency Act (OFRA) with a climate test for proposed logging operations are three workable legislative options to remedy this situation, incentivize climate smart forest practices, generate thousands of new jobs and vastly improve climate resilience 2. A zero carbon flux policy objective (making sure that on average, over tim…	1. sequestration by timber plantations and management in accordance with minimum requirements of Oregon’s Forest Practices Act (OFPA) cannot meet two of the most basic tests for the validity of offsets: additionality and permanence; Lack of ecological standards for state and private forestlands has resulted in a landscape dominated by short rotation timber plantations that store far less carbon t…	N/A
4	Talberth	Oregon Forest Carbon Policy: Scientific and technical brief to guide legislative intervention	2017	Harvest carbon store modeling and Carbon emissions accounting	1. Implications for policy	Conservation	N/A	PNW	Smith, J.E., Heath, L.S., Skog, K.E., Birdsey, R.A., 2006. Methods for Calculating Forest Ecosystem and Harvested Carbon with Standard Estimates for Forest Types of the United States. Gen Tech. Rpt. NE-343. Morgantown, WV: USDA Forest Service, Northeastern Research Station.	No	N/A	harvested stem / C stored in wood products	N/A	Mentioned under climate change	Mentioned under climate change	Mentioned under climate change	Mentioned under climate change	Mentioned under climate change	N/A	% of the embodied carbon in sawlogs that is retained after 100 years in longer lived wood products and landfills (PNW)	N/A	N/A	N/A	N/A	Not used	1. The timber industry often makes the claim that reducing its harvests to protect environmental values will have the unintended consequence of increasing consumption of substitutes that have a higher carbon footprint 2. wood derived from deforestation or the conversion of old growth forests to tree plantations carries with it a high carbon footprint that lasts generations and overshadows any ben…	N/A	1. Moreover, the application of chemical herbicides and fertilizers used to suppress competing vegetation and enhance seedling growth in clearcuts generates additional carbon emissions above and beyond the emissions associated with timber harvest because they contain embodied carbon that is released into the atmosphere in a short period of time. In addition, nitrogen-based fertilizers (urea being…	N/A	Positive	1. Even if conventional clearcutting and even aged practices are used, significantly extending rotation lengths (time between harvests) can mitigate many of the adverse impacts and flip high emissions landscapes back into those that accumulate and store high densities of carbon 2. The ecological and economic benefits of long rotations have been extremely well researched and established. Curtis (1…	100 years	1. Since carbon storage and resiliency to fires, drought, floods, and pathogens is maximized in LSOG forests, anything that can be done to put existing timber plantations and other younger forests on a trajectory to eventually develop LSOG conditions is smart climate policy. Importantly, this does not mean excluding timber harvest. To the contrary, in existing plantations and other younger forest…	1. These plantations also undermine climate resiliency because they are much more susceptible to drought, disease, wildfire, floods, landslides, low summertime streamflow, thermal pollution, fish kills, regeneration failures, exotic and invasive species and other climate change-induced impacts than natural forests 2. Carbon emissions and low carbon storage are not the only climate concerns. Lands…	N/A	N/A	N/A	0.409	% of the embodied carbon in sawlogs that is retained after 100 years in longer lived wood products and landfills (PNW) (in use + landfill; doesn’t include energy displacement)	N/A	N/A	N/A	1. establish forest carbon reserves	1. Cap and invest, forest carbon tax and reward, and an Oregon Forest Resiliency Act (OFRA) with a climate test for proposed logging operations are three workable legislative options to remedy this situation, incentivize climate smart forest practices, generate thousands of new jobs and vastly improve climate resilience 2. A zero carbon flux policy objective (making sure that on average, over tim…	1. sequestration by timber plantations and management in accordance with minimum requirements of Oregon’s Forest Practices Act (OFPA) cannot meet two of the most basic tests for the validity of offsets: additionality and permanence; Lack of ecological standards for state and private forestlands has resulted in a landscape dominated by short rotation timber plantations that store far less carbon t…	N/A
4	Talberth	Oregon Forest Carbon Policy: Scientific and technical brief to guide legislative intervention	2017	Harvest carbon store modeling and Carbon emissions accounting	1. Implications for policy	Conservation	N/A	PNW	Smith, J.E., Heath, L.S., Skog, K.E., Birdsey, R.A., 2006. Methods for Calculating Forest Ecosystem and Harvested Carbon with Standard Estimates for Forest Types of the United States. Gen Tech. Rpt. NE-343. Morgantown, WV: USDA Forest Service, Northeastern Research Station.	No	N/A	harvested stem / C stored in wood products	N/A	Mentioned under climate change	Mentioned under climate change	Mentioned under climate change	Mentioned under climate change	Mentioned under climate change	N/A	% of the embodied carbon in pulpwood is retained 100 years after harvest in short lived wood products and landfills (PNW)	N/A	N/A	N/A	N/A	Not used	1. The timber industry often makes the claim that reducing its harvests to protect environmental values will have the unintended consequence of increasing consumption of substitutes that have a higher carbon footprint 2. wood derived from deforestation or the conversion of old growth forests to tree plantations carries with it a high carbon footprint that lasts generations and overshadows any ben…	N/A	1. Moreover, the application of chemical herbicides and fertilizers used to suppress competing vegetation and enhance seedling growth in clearcuts generates additional carbon emissions above and beyond the emissions associated with timber harvest because they contain embodied carbon that is released into the atmosphere in a short period of time. In addition, nitrogen-based fertilizers (urea being…	N/A	Positive	1. Even if conventional clearcutting and even aged practices are used, significantly extending rotation lengths (time between harvests) can mitigate many of the adverse impacts and flip high emissions landscapes back into those that accumulate and store high densities of carbon 2. The ecological and economic benefits of long rotations have been extremely well researched and established. Curtis (1…	100 years	1. Since carbon storage and resiliency to fires, drought, floods, and pathogens is maximized in LSOG forests, anything that can be done to put existing timber plantations and other younger forests on a trajectory to eventually develop LSOG conditions is smart climate policy. Importantly, this does not mean excluding timber harvest. To the contrary, in existing plantations and other younger forest…	1. These plantations also undermine climate resiliency because they are much more susceptible to drought, disease, wildfire, floods, landslides, low summertime streamflow, thermal pollution, fish kills, regeneration failures, exotic and invasive species and other climate change-induced impacts than natural forests 2. Carbon emissions and low carbon storage are not the only climate concerns. Lands…	N/A	N/A	N/A	0.076	% of the embodied carbon in pulpwood is retained 100 years after harvest in short lived wood products and landfills (PNW) (in use + landfill; doesn’t include energy displacement)	N/A	N/A	N/A	1. establish forest carbon reserves	1. Cap and invest, forest carbon tax and reward, and an Oregon Forest Resiliency Act (OFRA) with a climate test for proposed logging operations are three workable legislative options to remedy this situation, incentivize climate smart forest practices, generate thousands of new jobs and vastly improve climate resilience 2. A zero carbon flux policy objective (making sure that on average, over tim…	1. sequestration by timber plantations and management in accordance with minimum requirements of Oregon’s Forest Practices Act (OFPA) cannot meet two of the most basic tests for the validity of offsets: additionality and permanence; Lack of ecological standards for state and private forestlands has resulted in a landscape dominated by short rotation timber plantations that store far less carbon t…	N/A
5	Talberth	Oregon Forest Carbon Policy: Scientific and technical brief to guide legislative intervention	2017	Harvest carbon store modeling and Carbon emissions accounting	1. Implications for policy	Conservation	N/A	Oregon	Simmons, E.A., Scudder, M.G., Morgan, T.A., Berg, E.C., Christensen, G.A. 2016. Oregon’s Forest Products Industry and Timber Harvest 2013 With Trends Through 2014. Gen. Tech. Rpt. PNW-GTR-942. Portland, OR: USDA Forest Service Pacific Northwest Research Station.	No	N/A	harvested stem / C stored in wood products	N/A	Mentioned under climate change	Mentioned under climate change	Mentioned under climate change	Mentioned under climate change	Mentioned under climate change	N/A	% of Oregon’s timber harvest that ends up as longer-lived wood products in the form of finished dry lumber, other sawn products, finished plywood or veneer	N/A	N/A	N/A	N/A	Not used	1. The timber industry often makes the claim that reducing its harvests to protect environmental values will have the unintended consequence of increasing consumption of substitutes that have a higher carbon footprint 2. wood derived from deforestation or the conversion of old growth forests to tree plantations carries with it a high carbon footprint that lasts generations and overshadows any ben…	N/A	1. Moreover, the application of chemical herbicides and fertilizers used to suppress competing vegetation and enhance seedling growth in clearcuts generates additional carbon emissions above and beyond the emissions associated with timber harvest because they contain embodied carbon that is released into the atmosphere in a short period of time. In addition, nitrogen-based fertilizers (urea being…	N/A	Positive	1. Even if conventional clearcutting and even aged practices are used, significantly extending rotation lengths (time between harvests) can mitigate many of the adverse impacts and flip high emissions landscapes back into those that accumulate and store high densities of carbon 2. The ecological and economic benefits of long rotations have been extremely well researched and established. Curtis (1…	N/A	1. Since carbon storage and resiliency to fires, drought, floods, and pathogens is maximized in LSOG forests, anything that can be done to put existing timber plantations and other younger forests on a trajectory to eventually develop LSOG conditions is smart climate policy. Importantly, this does not mean excluding timber harvest. To the contrary, in existing plantations and other younger forest…	1. These plantations also undermine climate resiliency because they are much more susceptible to drought, disease, wildfire, floods, landslides, low summertime streamflow, thermal pollution, fish kills, regeneration failures, exotic and invasive species and other climate change-induced impacts than natural forests 2. Carbon emissions and low carbon storage are not the only climate concerns. Lands…	N/A	N/A	0.52	N/A	N/A	N/A	N/A	N/A	1. establish forest carbon reserves	1. Cap and invest, forest carbon tax and reward, and an Oregon Forest Resiliency Act (OFRA) with a climate test for proposed logging operations are three workable legislative options to remedy this situation, incentivize climate smart forest practices, generate thousands of new jobs and vastly improve climate resilience 2. A zero carbon flux policy objective (making sure that on average, over tim…	1. sequestration by timber plantations and management in accordance with minimum requirements of Oregon’s Forest Practices Act (OFPA) cannot meet two of the most basic tests for the validity of offsets: additionality and permanence; Lack of ecological standards for state and private forestlands has resulted in a landscape dominated by short rotation timber plantations that store far less carbon t…	N/A
5	Talberth	Oregon Forest Carbon Policy: Scientific and technical brief to guide legislative intervention	2017	Harvest carbon store modeling and Carbon emissions accounting	1. Implications for policy	Conservation	N/A	Oregon	Simmons, E.A., Scudder, M.G., Morgan, T.A., Berg, E.C., Christensen, G.A. 2016. Oregon’s Forest Products Industry and Timber Harvest 2013 With Trends Through 2014. Gen. Tech. Rpt. PNW-GTR-942. Portland, OR: USDA Forest Service Pacific Northwest Research Station.	No	N/A	harvested stem / C stored in wood products	N/A	Mentioned under climate change	Mentioned under climate change	Mentioned under climate change	Mentioned under climate change	Mentioned under climate change	N/A	% of Oregon’s timber harvest that ends up as short-lived products	N/A	N/A	N/A	N/A	Not used	1. The timber industry often makes the claim that reducing its harvests to protect environmental values will have the unintended consequence of increasing consumption of substitutes that have a higher carbon footprint 2. wood derived from deforestation or the conversion of old growth forests to tree plantations carries with it a high carbon footprint that lasts generations and overshadows any ben…	N/A	1. Moreover, the application of chemical herbicides and fertilizers used to suppress competing vegetation and enhance seedling growth in clearcuts generates additional carbon emissions above and beyond the emissions associated with timber harvest because they contain embodied carbon that is released into the atmosphere in a short period of time. In addition, nitrogen-based fertilizers (urea being…	N/A	Positive	1. Even if conventional clearcutting and even aged practices are used, significantly extending rotation lengths (time between harvests) can mitigate many of the adverse impacts and flip high emissions landscapes back into those that accumulate and store high densities of carbon 2. The ecological and economic benefits of long rotations have been extremely well researched and established. Curtis (1…	N/A	1. Since carbon storage and resiliency to fires, drought, floods, and pathogens is maximized in LSOG forests, anything that can be done to put existing timber plantations and other younger forests on a trajectory to eventually develop LSOG conditions is smart climate policy. Importantly, this does not mean excluding timber harvest. To the contrary, in existing plantations and other younger forest…	1. These plantations also undermine climate resiliency because they are much more susceptible to drought, disease, wildfire, floods, landslides, low summertime streamflow, thermal pollution, fish kills, regeneration failures, exotic and invasive species and other climate change-induced impacts than natural forests 2. Carbon emissions and low carbon storage are not the only climate concerns. Lands…	N/A	N/A	0.41	N/A	N/A	N/A	N/A	N/A	1. establish forest carbon reserves	1. Cap and invest, forest carbon tax and reward, and an Oregon Forest Resiliency Act (OFRA) with a climate test for proposed logging operations are three workable legislative options to remedy this situation, incentivize climate smart forest practices, generate thousands of new jobs and vastly improve climate resilience 2. A zero carbon flux policy objective (making sure that on average, over tim…	1. sequestration by timber plantations and management in accordance with minimum requirements of Oregon’s Forest Practices Act (OFPA) cannot meet two of the most basic tests for the validity of offsets: additionality and permanence; Lack of ecological standards for state and private forestlands has resulted in a landscape dominated by short rotation timber plantations that store far less carbon t…	N/A
5	Talberth	Oregon Forest Carbon Policy: Scientific and technical brief to guide legislative intervention	2017	Harvest carbon store modeling and Carbon emissions accounting	1. Implications for policy	Conservation	N/A	Oregon	Simmons, E.A., Scudder, M.G., Morgan, T.A., Berg, E.C., Christensen, G.A. 2016. Oregon’s Forest Products Industry and Timber Harvest 2013 With Trends Through 2014. Gen. Tech. Rpt. PNW-GTR-942. Portland, OR: USDA Forest Service Pacific Northwest Research Station.	No	N/A	harvested stem / C stored in wood products	N/A	Mentioned under climate change	Mentioned under climate change	Mentioned under climate change	Mentioned under climate change	Mentioned under climate change	N/A	% of Oregon’s timber harvest that ends up as waste and shrinkage	N/A	N/A	N/A	N/A	Not used	1. The timber industry often makes the claim that reducing its harvests to protect environmental values will have the unintended consequence of increasing consumption of substitutes that have a higher carbon footprint 2. wood derived from deforestation or the conversion of old growth forests to tree plantations carries with it a high carbon footprint that lasts generations and overshadows any ben…	N/A	1. Moreover, the application of chemical herbicides and fertilizers used to suppress competing vegetation and enhance seedling growth in clearcuts generates additional carbon emissions above and beyond the emissions associated with timber harvest because they contain embodied carbon that is released into the atmosphere in a short period of time. In addition, nitrogen-based fertilizers (urea being…	N/A	Positive	1. Even if conventional clearcutting and even aged practices are used, significantly extending rotation lengths (time between harvests) can mitigate many of the adverse impacts and flip high emissions landscapes back into those that accumulate and store high densities of carbon 2. The ecological and economic benefits of long rotations have been extremely well researched and established. Curtis (1…	N/A	1. Since carbon storage and resiliency to fires, drought, floods, and pathogens is maximized in LSOG forests, anything that can be done to put existing timber plantations and other younger forests on a trajectory to eventually develop LSOG conditions is smart climate policy. Importantly, this does not mean excluding timber harvest. To the contrary, in existing plantations and other younger forest…	1. These plantations also undermine climate resiliency because they are much more susceptible to drought, disease, wildfire, floods, landslides, low summertime streamflow, thermal pollution, fish kills, regeneration failures, exotic and invasive species and other climate change-induced impacts than natural forests 2. Carbon emissions and low carbon storage are not the only climate concerns. Lands…	N/A	N/A	0.07	N/A	N/A	N/A	N/A	N/A	1. establish forest carbon reserves	1. Cap and invest, forest carbon tax and reward, and an Oregon Forest Resiliency Act (OFRA) with a climate test for proposed logging operations are three workable legislative options to remedy this situation, incentivize climate smart forest practices, generate thousands of new jobs and vastly improve climate resilience 2. A zero carbon flux policy objective (making sure that on average, over tim…	1. sequestration by timber plantations and management in accordance with minimum requirements of Oregon’s Forest Practices Act (OFPA) cannot meet two of the most basic tests for the validity of offsets: additionality and permanence; Lack of ecological standards for state and private forestlands has resulted in a landscape dominated by short rotation timber plantations that store far less carbon t…	N/A
5	Talberth	Oregon Forest Carbon Policy: Scientific and technical brief to guide legislative intervention	2017	Harvest carbon store modeling and Carbon emissions accounting	1. Implications for policy	Conservation	N/A	Oregon	N/A	No	N/A	harvested stem / C stored in wood products	N/A	Mentioned under climate change	Mentioned under climate change	Mentioned under climate change	Mentioned under climate change	Mentioned under climate change	N/A	weighted average value of STOR: STOR = CO2-e removed from site and stored in long-lived (100+ years) wood products	N/A	N/A	N/A	N/A	Not used	1. The timber industry often makes the claim that reducing its harvests to protect environmental values will have the unintended consequence of increasing consumption of substitutes that have a higher carbon footprint 2. wood derived from deforestation or the conversion of old growth forests to tree plantations carries with it a high carbon footprint that lasts generations and overshadows any ben…	N/A	1. Moreover, the application of chemical herbicides and fertilizers used to suppress competing vegetation and enhance seedling growth in clearcuts generates additional carbon emissions above and beyond the emissions associated with timber harvest because they contain embodied carbon that is released into the atmosphere in a short period of time. In addition, nitrogen-based fertilizers (urea being…	N/A	Positive	1. Even if conventional clearcutting and even aged practices are used, significantly extending rotation lengths (time between harvests) can mitigate many of the adverse impacts and flip high emissions landscapes back into those that accumulate and store high densities of carbon 2. The ecological and economic benefits of long rotations have been extremely well researched and established. Curtis (1…	N/A	1. Since carbon storage and resiliency to fires, drought, floods, and pathogens is maximized in LSOG forests, anything that can be done to put existing timber plantations and other younger forests on a trajectory to eventually develop LSOG conditions is smart climate policy. Importantly, this does not mean excluding timber harvest. To the contrary, in existing plantations and other younger forest…	1. These plantations also undermine climate resiliency because they are much more susceptible to drought, disease, wildfire, floods, landslides, low summertime streamflow, thermal pollution, fish kills, regeneration failures, exotic and invasive species and other climate change-induced impacts than natural forests 2. Carbon emissions and low carbon storage are not the only climate concerns. Lands…	N/A	1. This suggests a weighted average value of STOR of (52% x 41%) + (41% x 7.6%) + (7% x 0%) =24.44%, largely corroborating Ingerson (2009) a. A 2016 analysis found that about 52% of Oregon’s timber harvest ends up as longer-lived wood products in the form of finished dry lumber, other sawn products, finished plywood or veneer, 41% to short-lived products and 7% to waste and shrinkage ( b. Forest …	N/A	0.2444	weighted average value of STOR: STOR = CO2-e removed from site and stored in long-lived (100+ years) wood products	N/A	N/A	N/A	1. establish forest carbon reserves	1. Cap and invest, forest carbon tax and reward, and an Oregon Forest Resiliency Act (OFRA) with a climate test for proposed logging operations are three workable legislative options to remedy this situation, incentivize climate smart forest practices, generate thousands of new jobs and vastly improve climate resilience 2. A zero carbon flux policy objective (making sure that on average, over tim…	1. sequestration by timber plantations and management in accordance with minimum requirements of Oregon’s Forest Practices Act (OFPA) cannot meet two of the most basic tests for the validity of offsets: additionality and permanence; Lack of ecological standards for state and private forestlands has resulted in a landscape dominated by short rotation timber plantations that store far less carbon t…	N/A
5	Buchholz et al.	A global meta-analysis of forest bioenergy greenhouse gas emission accounting studies	2016	Review/All-encompassing	1. Analyzing previously published studies, our goal was to identify and prioritize those attributes of bioenergy greenhouse gas (GHG) emissions analysis that are most influential on length of car- bon payback period. We investigated outcomes of 59 previously published forest biomass greenhouse gas emis- sions research studies published between 1991 and 2014. We identified attributes for each stud…	Other/Unsure	Discussed	Global	N/A	No	N/A		Seven carbon pools were restricted to the forest ecosystem (Above ground live biomass, Aboveground standing dead biomass, Belowground live biomass, Belowground dead biomass, Forest floor, Merchantable timber, Harvest residue), four carbon pools described the processing of material (Forest treatment operations, Recovery of biomass in the forest, Trans- port, Mill residue), while two carbon pools d…	N/A	N/A	N/A	N/A	N/A	N/A	N/A	N/A	N/A	N/A	N/A	N/A	N/A	1. Although the leakage con- cept has been well defined, it is challenging to quantify because of the varying size and global nature of markets for different forest products	N/A	N/A	N/A	N/A	N/A	N/A	N/A	N/A	N/A	N/A	N/A	N/A	N/A	N/A	N/A	N/A	1. For carbon payback period cal- culations to provide operational insights to decision makers, future research should focus on creating common accounting principles for the most influential factors including temporal scale, natural disturbances, system boundaries, GHG emission metrics, and baselines. 2. Project baseline and leakage are two attributes consis- tently used in the quantification of …	1. Studies having the shortest carbon payback period (l = 5 years, SD = 15) did not account for wildfire dynamics or leak- age, were from an author group other than authors who were at some point associated with the Joanneum Research Forschungsgesellschaft mbH (Graz, Austria), included a fossil energy source other than natural gas, and did not use a dynamic baseline. Studies having the longest ca…	N/A
5	Kaziolas	Life Cycle Analysis and Optimization of a Timber Building	2015	Cost optimization	1. The present study propose a thorough approach to the optimization of the whole-life cost of a timber building focusing mostly on its mechanical, structural and energy subsystems for a life cycle of 20 years; The objective function of the energy performance optimization problem of the study is a cost function: the aim of the analysis is the calculation of the cost associated with the life cycle…	Other/Unsure	N/A	Greece	N/A	Yes	Attributional	N/A	N/A	N/A	N/A	N/A	N/A	N/A	N/A	N/A	N/A	N/A	1. the average life cycle of frequently used- building materials and subsystems Building Exteriors, Doors, and Windows: 80 years (lifetime) Timber structural systems: 50 years (lifetime) Mineral wool insulation profiles: 50 years Photovoltaic panels: 25 years HVAC systems: 15-20 years Gypsum boards: 75 years	N/A	N/A	N/A	N/A	N/A	N/A	N/A	N/A	20 years	N/A	N/A	1. The mineral wool wall insulation profile is expected to end up in a landfill despite the fact that most of it can be recycled at the end of its useful life 2. The gypsum boards are assumed that will end up in a landfill, despite the fact that they could be recyclable to some extent at the end of their useful life.	1. the present study based its assumptions on a score of 50% environmental friendliness and 50% economic efficiency, for each examined building component.	1. It can be observed that for the current rates the decision of recycling the timber frame components is more cost-effective than reusing them.	N/A	N/A	N/A	N/A	N/A	N/A	N/A	N/A	N/A
5	Talberth	Clearcutting our Carbon Accounts: How State and private forest practices are subverting Oregon’s climate agenda	2015	Carbon flux / Emissions accounting	1. Here, we completed a preliminary analysis of logging emissions generated through a number of channels over the 2000-2014 timber period for State and private forestlands in western Oregon. We estimated gross emissions from three sources: (1) timber harvest; (2) lost sequestration capacity, and (3) forest pesticides, herbicides, and fertilizers. We then adjusted these gross emissions figures to …	Conservation	1. The biggest unknown in this analysis is the amount of carbon sequestered (NEP) by lands not affected by timber harvest. Under a proper GHG accounting framework, emissions from timber harvest and chemicals for any particular owner should be offset by the amount of carbon sequestered on that owner’s residual lands. But there are no reliable NEP estimates for Oregon’s forests that distinguish bet…	Oregon	1. (Table 2) The first is the data relied upon in the 2009 inventory, prepared by the Oregon-California (ORCA) carbon assessment project at the Oregon State University. For Oregon’s 28 million acres of forestland as a whole the three-year rolling average NEP for 2002 was calculated as - 16.50 MMT-CO2-e. It is reasonable to assume that this average NEP did not increase since that time due to consi…	No	N/A	live tree volume / forest cover	N/A	1. Increasing water temperatures are another climate change challenge worsened by current practices on state and private lands. On these lands, practices that are consistent with the Oregon Forest Practices Act (OFPA)’s no-cut buffer restrictions of 20 feet or less for most streams and rivers can be expected to increase mean water temperatures by 2.61 °F over and above ambient warming due to clim…	1. Rapid clearcutting on state and private forestlands has transformed vast areas of more fire-resistant native forests into open brush fields and dense young tree plantations that are more prone to explosive, hot crown fires that kill more trees and spread fires faster and farther 2. As noted by the US Forest Service in an evaluation of the 2003 fire season “plantations experienced a disproporti…	N/A	1. The vast network of clearcuts and logging roads present on state and private forestlands also presents a big risk for landslides, especially during extreme precipitation events such as the 1996 floods. Under almost all climate change scenarios for Oregon, the frequency of these events will increase even if overall precipitation patterns remain unchanged. Maintenance of strong root systems is a…	Mentioned (disease and pest outbreak)	N/A	ORCA net ecosystem productivity (Turner et al. scenario isnt included but should be….)	N/A	N/A	N/A	N/A	Not used	1. ;The presumption that emissions increase as wood substitutes increase cannot be substantiated; there are alternatives; like bamboo with 0 zero emissions opposed to wood with “low” emission and steel with “high” emissions	N/A	1. Accounting protocols also acknowledge the emissions from carbon intensive pesticides, herbicides, and fertilizers applied on forestlands. As more land is harvested through even-aged clearcutting techniques, more chemicals are required and more emissions are generated relative to harvest techniques that rely on natural regeneration.	N/A	Positive	1. Current forest practices that include short rotations, extensive timber plantations, clearcutting, and a rapid rate of harvest maintain lands in a high-risk condition for all these threats due to homogenization of fuel loads and retention of logging slash on site among other factors. 2. Long rotations and alternatives to clearcutting and chemical spraying should be high on the list of such str…	N/A	N/A	1. Industrial forest practices are also undermining goals for climate adaptation by keeping millions of acres of forestland in a high-risk condition for wildfire, landslides, disease and pest outbreaks while contributing to thermal pollution deadly to coldwater fisheries; Oregon is undermining climate adaptation goals that seek to protect rural communities from the risks of wildfires, floods and …	N/A	1. NEP is inversely correlated with emissions because higher NEP means more carbon uptake. NEP is dependent on many factors, but the most important are the amount of forest cover, the extent of forest degradation, and climate variability.	Industry (1.12), State (non-industry) (2.15), Total (3.27) (Western Oregon state and private forestlands MMT-CO2-e) - we report annual average emissions from timber harvest, deforestation, and forest chemicals and fertilizers as well as adjustments to account for carbon stored in long lived wood products and sequestered on residual lands not affected by timber harvest during the 2000 to 2014 peri…	18% (Ingerson (2009))	% of original carbon stores preserved after logging and converted to long-lived products (and only for a few decades at most before those longer lived wood products start to decay); related to EMISSIONS FROM TIMBER HARVEST; from Ingerson (2009)	N/A	N/A	N/A	N/A	1. Rapid clear-cutting over the past 14 years has generated significant greenhouse gas emissions from industrial logging and a loss of carbon sequestration capacity 1a. These emissions have averaged between 9.75 and 19.35 million metric tons carbon dioxide equivalent (MMT CO2-e) per year since 2000 on State and private forestlands in western Oregon. This represents between 16% and 32% of the 60.8…	N/A	N/A
6	Talberth	Clearcutting our Carbon Accounts: How State and private forest practices are subverting Oregon’s climate agenda	2015	Carbon flux / Emissions accounting	1. Here, we completed a preliminary analysis of logging emissions generated through a number of channels over the 2000-2014 timber period for State and private forestlands in western Oregon. We estimated gross emissions from three sources: (1) timber harvest; (2) lost sequestration capacity, and (3) forest pesticides, herbicides, and fertilizers. We then adjusted these gross emissions figures to …	Conservation	1. The biggest unknown in this analysis is the amount of carbon sequestered (NEP) by lands not affected by timber harvest. Under a proper GHG accounting framework, emissions from timber harvest and chemicals for any particular owner should be offset by the amount of carbon sequestered on that owner’s residual lands. But there are no reliable NEP estimates for Oregon’s forests that distinguish bet…	Oregon	1. (Table 2) The first is the data relied upon in the 2009 inventory, prepared by the Oregon-California (ORCA) carbon assessment project at the Oregon State University. For Oregon’s 28 million acres of forestland as a whole the three-year rolling average NEP for 2002 was calculated as - 16.50 MMT-CO2-e. It is reasonable to assume that this average NEP did not increase since that time due to consi…	No	N/A	live tree volume / forest cover	N/A	1. Increasing water temperatures are another climate change challenge worsened by current practices on state and private lands. On these lands, practices that are consistent with the Oregon Forest Practices Act (OFPA)’s no-cut buffer restrictions of 20 feet or less for most streams and rivers can be expected to increase mean water temperatures by 2.61 °F over and above ambient warming due to clim…	1. Rapid clearcutting on state and private forestlands has transformed vast areas of more fire-resistant native forests into open brush fields and dense young tree plantations that are more prone to explosive, hot crown fires that kill more trees and spread fires faster and farther 2. As noted by the US Forest Service in an evaluation of the 2003 fire season “plantations experienced a disproporti…	N/A	1. The vast network of clearcuts and logging roads present on state and private forestlands also presents a big risk for landslides, especially during extreme precipitation events such as the 1996 floods. Under almost all climate change scenarios for Oregon, the frequency of these events will increase even if overall precipitation patterns remain unchanged. Maintenance of strong root systems is a…	Mentioned (disease and pest outbreak)	N/A	ORCA - net carbon flux (emissions)	N/A	N/A	N/A	N/A	1. The presumption that emissions increase as wood substitutes increase cannot be substantiated; there are alternatives; like bamboo with 0 zero emissions opposed to wood with “low” emission and steel with “high” emissions	N/A	N/A	1. Accounting protocols also acknowledge the emissions from carbon intensive pesticides, herbicides, and fertilizers applied on forestlands. As more land is harvested through even-aged clearcutting techniques, more chemicals are required and more emissions are generated relative to harvest techniques that rely on natural regeneration.	N/A	Positive	1. Current forest practices that include short rotations, extensive timber plantations, clearcutting, and a rapid rate of harvest maintain lands in a high-risk condition for all these threats due to homogenization of fuel loads and retention of logging slash on site among other factors. 2. Long rotations and alternatives to clearcutting and chemical spraying should be high on the list of such str…	N/A	N/A	1. Industrial forest practices are also undermining goals for climate adaptation by keeping millions of acres of forestland in a high-risk condition for wildfire, landslides, disease and pest outbreaks while contributing to thermal pollution deadly to coldwater fisheries; Oregon is undermining climate adaptation goals that seek to protect rural communities from the risks of wildfires, floods and …	N/A	N/A	Industry 15.88, State (non-industry) 3.69, Total 19.39 (Western Oregon state and private forestlands MMT-CO2-e) - we report annual average emissions from timber harvest, deforestation, and forest chemicals and fertilizers as well as adjustments to account for carbon stored in long lived wood products and sequestered on residual lands not affected by timber harvest during the 2000 to 2014 period.	N/A	N/A	N/A	N/A	N/A	N/A	1. Rapid clear-cutting over the past 14 years has generated significant greenhouse gas emissions from industrial logging and a loss of carbon sequestration capacity 1a. These emissions have averaged between 9.75 and 19.35 million metric tons carbon dioxide equivalent (MMT CO2-e) per year since 2000 on State and private forestlands in western Oregon. This represents between 16% and 32% of the 60.8…	N/A	N/A
7	Talberth	Clearcutting our Carbon Accounts: How State and private forest practices are subverting Oregon’s climate agenda	2015	Carbon flux / Emissions accounting	1. Here, we completed a preliminary analysis of logging emissions generated through a number of channels over the 2000-2014 timber period for State and private forestlands in western Oregon. We estimated gross emissions from three sources: (1) timber harvest; (2) lost sequestration capacity, and (3) forest pesticides, herbicides, and fertilizers. We then adjusted these gross emissions figures to …	Conservation	1. The biggest unknown in this analysis is the amount of carbon sequestered (NEP) by lands not affected by timber harvest. Under a proper GHG accounting framework, emissions from timber harvest and chemicals for any particular owner should be offset by the amount of carbon sequestered on that owner’s residual lands. But there are no reliable NEP estimates for Oregon’s forests that distinguish bet…	Oregon	1. (Table 3) The second method relies on information from a somewhat more recent (2003-2007) NEP analysis for forests in northern California, Oregon and Washington within the range of the northern spotted owl. While the analysis distinguishes between private and public ownerships, it does so at this regional scale and so may miss significant differences in forest practices among the states. For p…	No	N/A	live tree volume / forest cover	N/A	1. Increasing water temperatures are another climate change challenge worsened by current practices on state and private lands. On these lands, practices that are consistent with the Oregon Forest Practices Act (OFPA)’s no-cut buffer restrictions of 20 feet or less for most streams and rivers can be expected to increase mean water temperatures by 2.61 °F over and above ambient warming due to clim…	1. Rapid clearcutting on state and private forestlands has transformed vast areas of more fire-resistant native forests into open brush fields and dense young tree plantations that are more prone to explosive, hot crown fires that kill more trees and spread fires faster and farther 2. As noted by the US Forest Service in an evaluation of the 2003 fire season “plantations experienced a disproporti…	N/A	1. The vast network of clearcuts and logging roads present on state and private forestlands also presents a big risk for landslides, especially during extreme precipitation events such as the 1996 floods. Under almost all climate change scenarios for Oregon, the frequency of these events will increase even if overall precipitation patterns remain unchanged. Maintenance of strong root systems is a…	Mentioned (disease and pest outbreak)	N/A	Turner net ecosystem productivity	N/A	N/A	N/A	N/A	1. The presumption that emissions increase as wood substitutes increase cannot be substantiated; there are alternatives; like bamboo with 0 zero emissions opposed to wood with “low” emission and steel with “high” emissions	N/A	N/A	1. Accounting protocols also acknowledge the emissions from carbon intensive pesticides, herbicides, and fertilizers applied on forestlands. As more land is harvested through even-aged clearcutting techniques, more chemicals are required and more emissions are generated relative to harvest techniques that rely on natural regeneration.	N/A	Positive	1. Current forest practices that include short rotations, extensive timber plantations, clearcutting, and a rapid rate of harvest maintain lands in a high-risk condition for all these threats due to homogenization of fuel loads and retention of logging slash on site among other factors. 2. Long rotations and alternatives to clearcutting and chemical spraying should be high on the list of such str…	N/A	N/A	1. Industrial forest practices are also undermining goals for climate adaptation by keeping millions of acres of forestland in a high-risk condition for wildfire, landslides, disease and pest outbreaks while contributing to thermal pollution deadly to coldwater fisheries; Oregon is undermining climate adaptation goals that seek to protect rural communities from the risks of wildfires, floods and …	N/A	1. NEP is inversely correlated with emissions because higher NEP means more carbon uptake. NEP is dependent on many factors, but the most important are the amount of forest cover, the extent of forest degradation, and climate variability.	Industry (4.43), State (non-industry) (8.48), Total (12.91) (Western Oregon state and private forestlands MMT-CO2-e) - we report annual average emissions from timber harvest, deforestation, and forest chemicals and fertilizers as well as adjustments to account for carbon stored in long lived wood products and sequestered on residual lands not affected by timber harvest during the 2000 to 2014 per…	N/A	N/A	N/A	N/A	N/A	N/A	1. Rapid clear-cutting over the past 14 years has generated significant greenhouse gas emissions from industrial logging and a loss of carbon sequestration capacity 1a. These emissions have averaged between 9.75 and 19.35 million metric tons carbon dioxide equivalent (MMT CO2-e) per year since 2000 on State and private forestlands in western Oregon. This represents between 16% and 32% of the 60.8…	N/A	N/A
7	Talberth	Clearcutting our Carbon Accounts: How State and private forest practices are subverting Oregon’s climate agenda	2015	Carbon flux / Emissions accounting	1. Here, we completed a preliminary analysis of logging emissions generated through a number of channels over the 2000-2014 timber period for State and private forestlands in western Oregon. We estimated gross emissions from three sources: (1) timber harvest; (2) lost sequestration capacity, and (3) forest pesticides, herbicides, and fertilizers. We then adjusted these gross emissions figures to …	Conservation	1. The biggest unknown in this analysis is the amount of carbon sequestered (NEP) by lands not affected by timber harvest. Under a proper GHG accounting framework, emissions from timber harvest and chemicals for any particular owner should be offset by the amount of carbon sequestered on that owner’s residual lands. But there are no reliable NEP estimates for Oregon’s forests that distinguish bet…	Oregon	1. (Table 3) The second method relies on information from a somewhat more recent (2003-2007) NEP analysis for forests in northern California, Oregon and Washington within the range of the northern spotted owl. While the analysis distinguishes between private and public ownerships, it does so at this regional scale and so may miss significant differences in forest practices among the states. For p…	No	N/A	live tree volume / forest cover	N/A	1. Increasing water temperatures are another climate change challenge worsened by current practices on state and private lands. On these lands, practices that are consistent with the Oregon Forest Practices Act (OFPA)’s no-cut buffer restrictions of 20 feet or less for most streams and rivers can be expected to increase mean water temperatures by 2.61 °F over and above ambient warming due to clim…	1. Rapid clearcutting on state and private forestlands has transformed vast areas of more fire-resistant native forests into open brush fields and dense young tree plantations that are more prone to explosive, hot crown fires that kill more trees and spread fires faster and farther 2. As noted by the US Forest Service in an evaluation of the 2003 fire season “plantations experienced a disproporti…	N/A	1. The vast network of clearcuts and logging roads present on state and private forestlands also presents a big risk for landslides, especially during extreme precipitation events such as the 1996 floods. Under almost all climate change scenarios for Oregon, the frequency of these events will increase even if overall precipitation patterns remain unchanged. Maintenance of strong root systems is a…	Mentioned (disease and pest outbreak)	N/A	Turner - net carbon flux (emissions)	N/A	N/A	N/A	N/A	1. The presumption that emissions increase as wood substitutes increase cannot be substantiated; there are alternatives; like bamboo with 0 zero emissions opposed to wood with “low” emission and steel with “high” emissions	N/A	N/A	1. Accounting protocols also acknowledge the emissions from carbon intensive pesticides, herbicides, and fertilizers applied on forestlands. As more land is harvested through even-aged clearcutting techniques, more chemicals are required and more emissions are generated relative to harvest techniques that rely on natural regeneration.	N/A	Positive	1. Current forest practices that include short rotations, extensive timber plantations, clearcutting, and a rapid rate of harvest maintain lands in a high-risk condition for all these threats due to homogenization of fuel loads and retention of logging slash on site among other factors. 2. Long rotations and alternatives to clearcutting and chemical spraying should be high on the list of such str…	N/A	N/A	1. Industrial forest practices are also undermining goals for climate adaptation by keeping millions of acres of forestland in a high-risk condition for wildfire, landslides, disease and pest outbreaks while contributing to thermal pollution deadly to coldwater fisheries; Oregon is undermining climate adaptation goals that seek to protect rural communities from the risks of wildfires, floods and …	N/A	N/A	Industry 12.57, State (non-industry) (2.82), Total 9.75 (Western Oregon state and private forestlands MMT-CO2-e) - we report annual average emissions from timber harvest, deforestation, and forest chemicals and fertilizers as well as adjustments to account for carbon stored in long lived wood products and sequestered on residual lands not affected by timber harvest during the 2000 to 2014 period.	N/A	N/A	N/A	N/A	N/A	N/A	1. Rapid clear-cutting over the past 14 years has generated significant greenhouse gas emissions from industrial logging and a loss of carbon sequestration capacity 1a. These emissions have averaged between 9.75 and 19.35 million metric tons carbon dioxide equivalent (MMT CO2-e) per year since 2000 on State and private forestlands in western Oregon. This represents between 16% and 32% of the 60.8…	N/A	N/A
7	Talberth	Clearcutting our Carbon Accounts: How State and private forest practices are subverting Oregon’s climate agenda	2015	Carbon flux / Emissions accounting	1. Here, we completed a preliminary analysis of logging emissions generated through a number of channels over the 2000-2014 timber period for State and private forestlands in western Oregon. We estimated gross emissions from three sources: (1) timber harvest; (2) lost sequestration capacity, and (3) forest pesticides, herbicides, and fertilizers. We then adjusted these gross emissions figures to …	Conservation	1. The biggest unknown in this analysis is the amount of carbon sequestered (NEP) by lands not affected by timber harvest. Under a proper GHG accounting framework, emissions from timber harvest and chemicals for any particular owner should be offset by the amount of carbon sequestered on that owner’s residual lands. But there are no reliable NEP estimates for Oregon’s forests that distinguish bet…	Oregon	1. To estimate emissions associated with timber harvest, we overlaid two spatial data sets depicting forest carbon stocks in 2000 and another depicting forest cover loss attributable to clearcutting between 2000 and 2014. For initial forest carbon stocks, we relied on the Woods Hole Research Center’s high resolution National Biomass and Carbon Dataset for the year 2000 (published in 2012) the fir…	No	N/A	live tree volume / forest cover	N/A	1. Increasing water temperatures are another climate change challenge worsened by current practices on state and private lands. On these lands, practices that are consistent with the Oregon Forest Practices Act (OFPA)’s no-cut buffer restrictions of 20 feet or less for most streams and rivers can be expected to increase mean water temperatures by 2.61 °F over and above ambient warming due to clim…	1. Rapid clearcutting on state and private forestlands has transformed vast areas of more fire-resistant native forests into open brush fields and dense young tree plantations that are more prone to explosive, hot crown fires that kill more trees and spread fires faster and farther 2. As noted by the US Forest Service in an evaluation of the 2003 fire season “plantations experienced a disproporti…	N/A	1. The vast network of clearcuts and logging roads present on state and private forestlands also presents a big risk for landslides, especially during extreme precipitation events such as the 1996 floods. Under almost all climate change scenarios for Oregon, the frequency of these events will increase even if overall precipitation patterns remain unchanged. Maintenance of strong root systems is a…	Mentioned (disease and pest outbreak)	N/A	Turner/ORCA - Emissions from timber harvest	N/A	N/A	N/A	N/A	1. The presumption that emissions increase as wood substitutes increase cannot be substantiated; there are alternatives; like bamboo with 0 zero emissions opposed to wood with “low” emission and steel with “high” emissions	N/A	N/A	1. Accounting protocols also acknowledge the emissions from carbon intensive pesticides, herbicides, and fertilizers applied on forestlands. As more land is harvested through even-aged clearcutting techniques, more chemicals are required and more emissions are generated relative to harvest techniques that rely on natural regeneration.	N/A	Positive	1. Current forest practices that include short rotations, extensive timber plantations, clearcutting, and a rapid rate of harvest maintain lands in a high-risk condition for all these threats due to homogenization of fuel loads and retention of logging slash on site among other factors. 2. Long rotations and alternatives to clearcutting and chemical spraying should be high on the list of such str…	N/A	N/A	1. Industrial forest practices are also undermining goals for climate adaptation by keeping millions of acres of forestland in a high-risk condition for wildfire, landslides, disease and pest outbreaks while contributing to thermal pollution deadly to coldwater fisheries; Oregon is undermining climate adaptation goals that seek to protect rural communities from the risks of wildfires, floods and …	N/A	N/A	Industry 17.41, State (non-industry) 5.80, Total 23.21 (Western Oregon state and private forestlands MMT-CO2-e) - we report annual average emissions from timber harvest, deforestation, and forest chemicals and fertilizers as well as adjustments to account for carbon stored in long lived wood products and sequestered on residual lands not affected by timber harvest during the 2000 to 2014 period.	N/A	N/A	N/A	N/A	N/A	N/A	1. Rapid clear-cutting over the past 14 years has generated significant greenhouse gas emissions from industrial logging and a loss of carbon sequestration capacity 1a. These emissions have averaged between 9.75 and 19.35 million metric tons carbon dioxide equivalent (MMT CO2-e) per year since 2000 on State and private forestlands in western Oregon. This represents between 16% and 32% of the 60.8…	1. EMISSIONS FROM TIMBER HARVEST: When a forest is logged, emissions are generated through a number of channels, the most important being (a) the release of carbon once stored in trees when slash, needles, roots and stumps decay or are burned on site; (b) carbon released when soils are disturbed and eroded; (c) carbon released when wood waste is generated and then decays during processing, and; (…	N/A
7	Talberth	Clearcutting our Carbon Accounts: How State and private forest practices are subverting Oregon’s climate agenda	2015	Carbon flux / Emissions accounting	1. Here, we completed a preliminary analysis of logging emissions generated through a number of channels over the 2000-2014 timber period for State and private forestlands in western Oregon. We estimated gross emissions from three sources: (1) timber harvest; (2) lost sequestration capacity, and (3) forest pesticides, herbicides, and fertilizers. We then adjusted these gross emissions figures to …	Conservation	1. The biggest unknown in this analysis is the amount of carbon sequestered (NEP) by lands not affected by timber harvest. Under a proper GHG accounting framework, emissions from timber harvest and chemicals for any particular owner should be offset by the amount of carbon sequestered on that owner’s residual lands. But there are no reliable NEP estimates for Oregon’s forests that distinguish bet…	Oregon	1. Because the rate of clearcutting on state and private timberlands has exceeded the rate of forest regrowth over the 2000-2014 period, deforestation is occurring. During this time period, the GFW dataset indicates that nearly 1.6 million acres have been clearcut. During this same time period, just about 1.1 million acres of previously clearcut land attained minimum tree height and canopy closur…	No	N/A	live tree volume / forest cover	N/A	1. Increasing water temperatures are another climate change challenge worsened by current practices on state and private lands. On these lands, practices that are consistent with the Oregon Forest Practices Act (OFPA)’s no-cut buffer restrictions of 20 feet or less for most streams and rivers can be expected to increase mean water temperatures by 2.61 °F over and above ambient warming due to clim…	1. Rapid clearcutting on state and private forestlands has transformed vast areas of more fire-resistant native forests into open brush fields and dense young tree plantations that are more prone to explosive, hot crown fires that kill more trees and spread fires faster and farther 2. As noted by the US Forest Service in an evaluation of the 2003 fire season “plantations experienced a disproporti…	N/A	1. The vast network of clearcuts and logging roads present on state and private forestlands also presents a big risk for landslides, especially during extreme precipitation events such as the 1996 floods. Under almost all climate change scenarios for Oregon, the frequency of these events will increase even if overall precipitation patterns remain unchanged. Maintenance of strong root systems is a…	Mentioned (disease and pest outbreak)	N/A	Turner/ORCA - Emissions from lost carbon sequestration	N/A	N/A	N/A	N/A	1. The presumption that emissions increase as wood substitutes increase cannot be substantiated; there are alternatives; like bamboo with 0 zero emissions opposed to wood with “low” emission and steel with “high” emissions	N/A	N/A	1. Accounting protocols also acknowledge the emissions from carbon intensive pesticides, herbicides, and fertilizers applied on forestlands. As more land is harvested through even-aged clearcutting techniques, more chemicals are required and more emissions are generated relative to harvest techniques that rely on natural regeneration.	N/A	Positive	1. Current forest practices that include short rotations, extensive timber plantations, clearcutting, and a rapid rate of harvest maintain lands in a high-risk condition for all these threats due to homogenization of fuel loads and retention of logging slash on site among other factors. 2. Long rotations and alternatives to clearcutting and chemical spraying should be high on the list of such str…	N/A	N/A	1. Industrial forest practices are also undermining goals for climate adaptation by keeping millions of acres of forestland in a high-risk condition for wildfire, landslides, disease and pest outbreaks while contributing to thermal pollution deadly to coldwater fisheries; Oregon is undermining climate adaptation goals that seek to protect rural communities from the risks of wildfires, floods and …	N/A	N/A	Industry 2.68, State (non-industry) 0.89, Total 3.57 (Western Oregon state and private forestlands MMT-CO2-e) - we report annual average emissions from timber harvest, deforestation, and forest chemicals and fertilizers as well as adjustments to account for carbon stored in long lived wood products and sequestered on residual lands not affected by timber harvest during the 2000 to 2014 period.	N/A	N/A	N/A	N/A	N/A	N/A	1. Rapid clear-cutting over the past 14 years has generated significant greenhouse gas emissions from industrial logging and a loss of carbon sequestration capacity 1a. These emissions have averaged between 9.75 and 19.35 million metric tons carbon dioxide equivalent (MMT CO2-e) per year since 2000 on State and private forestlands in western Oregon. This represents between 16% and 32% of the 60.8…	N/A	N/A
7	Talberth	Clearcutting our Carbon Accounts: How State and private forest practices are subverting Oregon’s climate agenda	2015	Carbon flux / Emissions accounting	1. Here, we completed a preliminary analysis of logging emissions generated through a number of channels over the 2000-2014 timber period for State and private forestlands in western Oregon. We estimated gross emissions from three sources: (1) timber harvest; (2) lost sequestration capacity, and (3) forest pesticides, herbicides, and fertilizers. We then adjusted these gross emissions figures to …	Conservation	1. The biggest unknown in this analysis is the amount of carbon sequestered (NEP) by lands not affected by timber harvest. Under a proper GHG accounting framework, emissions from timber harvest and chemicals for any particular owner should be offset by the amount of carbon sequestered on that owner’s residual lands. But there are no reliable NEP estimates for Oregon’s forests that distinguish bet…	Oregon	1. Estimating emissions from forest pesticides, herbicides, and fertilizers is difficult because there is no regular reporting of annual applications. There are, however, a few periodic estimates we can make use of as well as the rates of application recommended on product labels. For forest chemicals, the three most common applied regularly include Atrazine, 2,4 D, and Glyphosate. There are at l…	No	N/A	live tree volume / forest cover	N/A	1. Increasing water temperatures are another climate change challenge worsened by current practices on state and private lands. On these lands, practices that are consistent with the Oregon Forest Practices Act (OFPA)’s no-cut buffer restrictions of 20 feet or less for most streams and rivers can be expected to increase mean water temperatures by 2.61 °F over and above ambient warming due to clim…	1. Rapid clearcutting on state and private forestlands has transformed vast areas of more fire-resistant native forests into open brush fields and dense young tree plantations that are more prone to explosive, hot crown fires that kill more trees and spread fires faster and farther 2. As noted by the US Forest Service in an evaluation of the 2003 fire season “plantations experienced a disproporti…	N/A	1. The vast network of clearcuts and logging roads present on state and private forestlands also presents a big risk for landslides, especially during extreme precipitation events such as the 1996 floods. Under almost all climate change scenarios for Oregon, the frequency of these events will increase even if overall precipitation patterns remain unchanged. Maintenance of strong root systems is a…	Mentioned (disease and pest outbreak)	N/A	Turner/ORCA - Emission from chemicals and fertilizers	N/A	N/A	N/A	N/A	1. The presumption that emissions increase as wood substitutes increase cannot be substantiated; there are alternatives; like bamboo with 0 zero emissions opposed to wood with “low” emission and steel with “high” emissions	N/A	N/A	1. Accounting protocols also acknowledge the emissions from carbon intensive pesticides, herbicides, and fertilizers applied on forestlands. As more land is harvested through even-aged clearcutting techniques, more chemicals are required and more emissions are generated relative to harvest techniques that rely on natural regeneration.	N/A	Positive	1. Current forest practices that include short rotations, extensive timber plantations, clearcutting, and a rapid rate of harvest maintain lands in a high-risk condition for all these threats due to homogenization of fuel loads and retention of logging slash on site among other factors. 2. Long rotations and alternatives to clearcutting and chemical spraying should be high on the list of such str…	N/A	N/A	1. Industrial forest practices are also undermining goals for climate adaptation by keeping millions of acres of forestland in a high-risk condition for wildfire, landslides, disease and pest outbreaks while contributing to thermal pollution deadly to coldwater fisheries; Oregon is undermining climate adaptation goals that seek to protect rural communities from the risks of wildfires, floods and …	N/A	N/A	Industry 0.04, State (non-industry) 0.02, Total 0.06 (Western Oregon state and private forestlands MMT-CO2-e) - we report annual average emissions from timber harvest, deforestation, and forest chemicals and fertilizers as well as adjustments to account for carbon stored in long lived wood products and sequestered on residual lands not affected by timber harvest during the 2000 to 2014 period.	N/A	N/A	N/A	N/A	N/A	N/A	1. Rapid clear-cutting over the past 14 years has generated significant greenhouse gas emissions from industrial logging and a loss of carbon sequestration capacity 1a. These emissions have averaged between 9.75 and 19.35 million metric tons carbon dioxide equivalent (MMT CO2-e) per year since 2000 on State and private forestlands in western Oregon. This represents between 16% and 32% of the 60.8…	N/A	N/A
7	Talberth	Clearcutting our Carbon Accounts: How State and private forest practices are subverting Oregon’s climate agenda	2015	Carbon flux / Emissions accounting	1. Here, we completed a preliminary analysis of logging emissions generated through a number of channels over the 2000-2014 timber period for State and private forestlands in western Oregon. We estimated gross emissions from three sources: (1) timber harvest; (2) lost sequestration capacity, and (3) forest pesticides, herbicides, and fertilizers. We then adjusted these gross emissions figures to …	Conservation	1. The biggest unknown in this analysis is the amount of carbon sequestered (NEP) by lands not affected by timber harvest. Under a proper GHG accounting framework, emissions from timber harvest and chemicals for any particular owner should be offset by the amount of carbon sequestered on that owner’s residual lands. But there are no reliable NEP estimates for Oregon’s forests that distinguish bet…	Oregon	N/A	No	N/A	live tree volume / forest cover	N/A	1. Increasing water temperatures are another climate change challenge worsened by current practices on state and private lands. On these lands, practices that are consistent with the Oregon Forest Practices Act (OFPA)’s no-cut buffer restrictions of 20 feet or less for most streams and rivers can be expected to increase mean water temperatures by 2.61 °F over and above ambient warming due to clim…	1. Rapid clearcutting on state and private forestlands has transformed vast areas of more fire-resistant native forests into open brush fields and dense young tree plantations that are more prone to explosive, hot crown fires that kill more trees and spread fires faster and farther 2. As noted by the US Forest Service in an evaluation of the 2003 fire season “plantations experienced a disproporti…	N/A	1. The vast network of clearcuts and logging roads present on state and private forestlands also presents a big risk for landslides, especially during extreme precipitation events such as the 1996 floods. Under almost all climate change scenarios for Oregon, the frequency of these events will increase even if overall precipitation patterns remain unchanged. Maintenance of strong root systems is a…	Mentioned (disease and pest outbreak)	N/A	Turner/ORCA - Net wood product sink	N/A	N/A	N/A	N/A	1. The presumption that emissions increase as wood substitutes increase cannot be substantiated; there are alternatives; like bamboo with 0 zero emissions opposed to wood with “low” emission and steel with “high” emissions	N/A	N/A	1. Accounting protocols also acknowledge the emissions from carbon intensive pesticides, herbicides, and fertilizers applied on forestlands. As more land is harvested through even-aged clearcutting techniques, more chemicals are required and more emissions are generated relative to harvest techniques that rely on natural regeneration.	N/A	Positive	1. Current forest practices that include short rotations, extensive timber plantations, clearcutting, and a rapid rate of harvest maintain lands in a high-risk condition for all these threats due to homogenization of fuel loads and retention of logging slash on site among other factors. 2. Long rotations and alternatives to clearcutting and chemical spraying should be high on the list of such str…	N/A	N/A	1. Industrial forest practices are also undermining goals for climate adaptation by keeping millions of acres of forestland in a high-risk condition for wildfire, landslides, disease and pest outbreaks while contributing to thermal pollution deadly to coldwater fisheries; Oregon is undermining climate adaptation goals that seek to protect rural communities from the risks of wildfires, floods and …	N/A	N/A	Industry (3.13), State (non-industry) (1.05), Total (4.18) (Western Oregon state and private forestlands MMT-CO2-e) - we report annual average emissions from timber harvest, deforestation, and forest chemicals and fertilizers as well as adjustments to account for carbon stored in long lived wood products and sequestered on residual lands not affected by timber harvest during the 2000 to 2014 peri…	N/A	N/A	N/A	N/A	N/A	N/A	1. Rapid clear-cutting over the past 14 years has generated significant greenhouse gas emissions from industrial logging and a loss of carbon sequestration capacity 1a. These emissions have averaged between 9.75 and 19.35 million metric tons carbon dioxide equivalent (MMT CO2-e) per year since 2000 on State and private forestlands in western Oregon. This represents between 16% and 32% of the 60.8…	N/A	N/A
7	Stewart	Documenting the Full climate benefits of Harvested Wood Products in Northern California: Linking Harvests to the US Greenhouse Gas Inventory	2012	Harvest carbon store modeling	1. Using a representative sample of partial cut and clear-cut harvests from Northern California, we estimated the financial and climate benefits of the harvested products. 2. The goal of this study was to use project-level data from a region that exemplifies best practices in terms of efficient utilization of harvested products to test whether the divergence in outcomes is primarily related to as…	Sustainable Industrial	N/A	Northern CA	N/A	No	N/A	harvested stem / C stored in wood products	N/A	N/A	N/A	N/A	N/A	N/A	N/A	Long-term carbon storage in products - post 2008 USFS wood utilization coefficients	1. The harvested woody biomass goes into products, energy, or uncollected waste. Sawlogs will be delivered to sawmills where dimensional lumber is the main product and chips are a secondary product.	N/A	1. Based on the average initial allocation of products over the past 30 years in which half of all timber products go into single family houses and half goes into multifamily buildings and other uses (McKeever and Howard 2011) and the estimated half-life of different types of wood products (Skog 2008), we calculated a 52-year half-life for wood products manufactured in California.	1. Based on 2006 California sawmill inventory results in Smith et al. (2009) and Keegan et al. (2010b), 75 percent of the delivered sawlogs ended up as wood products, 24 percent was used for energy, and 0.9 percent was uncollected waste. These more recent studies document a much more efficient process than the assumed 20 percent un- collected waste in Harmon et al. (1996) or the as- sumed 16 perc…	Used	1. A meta-analysis by Sathre and O’Connor (2010) of 21 international studies concluded that each ton of carbon in wood building products avoided an ad- ditional 1.1 tons of carbon emissions that would have occurred through producing more fossil fuel– intensive materials such as steel and cement	N/A	N/A	N/A	Negative	N/A	100 years	1. Clear-cut har- vest areas are replanted to meet state forest prac- tice laws and will not be harvested for decades. Partial cut harvest areas will typically be harvested periodically every 10 to 20 years	N/A	1. For our analysis, we assume that improved regulations and technology will result in 90 percent of future post- consumer wood going to engineered landfills or wood-fired energy plants	N/A	27 Estimated climate benefits in tons of CO2 equivalent (tCO2 eq) of harvested products from a 100-tCO2 eq representative harvest in Northern California	27	Estimated climate benefits in tons of CO2 equivalent (tCO2 eq) of harvested products from a 100-tCO2 eq representative harvest in Northern California	N/A	N/A	N/A	N/A	1. The majority of the additional climate benefits are related to direct and indirect energy substitution benefits that are tracked in the energy chapter rather than the forestry chapter in national and international greenhouse gas emission inventories (US Environmental Protection Agency 2012)	N/A	N/A
7	Stewart	Documenting the Full climate benefits of Harvested Wood Products in Northern California: Linking Harvests to the US Greenhouse Gas Inventory	2012	Harvest carbon store modeling	1. Using a representative sample of partial cut and clear-cut harvests from Northern California, we estimated the financial and climate benefits of the harvested products. 2. The goal of this study was to use project-level data from a region that exemplifies best practices in terms of efficient utilization of harvested products to test whether the divergence in outcomes is primarily related to as…	Sustainable Industrial	N/A	Northern CA	N/A	No	N/A	harvested stem / C stored in wood products	N/A	N/A	N/A	N/A	N/A	N/A	N/A	Long-term carbon storage in landfills - post 2008 USFS wood utilization coefficients	1. The harvested woody biomass goes into products, energy, or uncollected waste. Sawlogs will be delivered to sawmills where dimensional lumber is the main product and chips are a secondary product.	N/A	1. Based on the average initial allocation of products over the past 30 years in which half of all timber products go into single family houses and half goes into multifamily buildings and other uses (McKeever and Howard 2011) and the estimated half-life of different types of wood products (Skog 2008), we calculated a 52-year half-life for wood products manufactured in California.	1. Based on 2006 California sawmill inventory results in Smith et al. (2009) and Keegan et al. (2010b), 75 percent of the delivered sawlogs ended up as wood products, 24 percent was used for energy, and 0.9 percent was uncollected waste. These more recent studies document a much more efficient process than the assumed 20 percent un- collected waste in Harmon et al. (1996) or the as- sumed 16 perc…	Used	1. A meta-analysis by Sathre and O’Connor (2010) of 21 international studies concluded that each ton of carbon in wood building products avoided an ad- ditional 1.1 tons of carbon emissions that would have occurred through producing more fossil fuel– intensive materials such as steel and cement	N/A	N/A	N/A	Negative	N/A	100 years	1. Clear-cut har- vest areas are replanted to meet state forest prac- tice laws and will not be harvested for decades. Partial cut harvest areas will typically be harvested periodically every 10 to 20 years	N/A	1. For our analysis, we assume that improved regulations and technology will result in 90 percent of future post- consumer wood going to engineered landfills or wood-fired energy plants	N/A	7 Estimated climate benefits in tons of CO2 equivalent (tCO2 eq) of harvested products from a 100-tCO2 eq representative harvest in Northern California	7	Estimated climate benefits in tons of CO2 equivalent (tCO2 eq) of harvested products from a 100-tCO2 eq representative harvest in Northern California	N/A	N/A	N/A	N/A	1. The majority of the additional climate benefits are related to direct and indirect energy substitution benefits that are tracked in the energy chapter rather than the forestry chapter in national and international greenhouse gas emission inventories (US Environmental Protection Agency 2012)	N/A	N/A
7	Stewart	Documenting the Full climate benefits of Harvested Wood Products in Northern California: Linking Harvests to the US Greenhouse Gas Inventory	2012	Harvest carbon store modeling	1. Using a representative sample of partial cut and clear-cut harvests from Northern California, we estimated the financial and climate benefits of the harvested products. 2. The goal of this study was to use project-level data from a region that exemplifies best practices in terms of efficient utilization of harvested products to test whether the divergence in outcomes is primarily related to as…	Sustainable Industrial	N/A	Northern CA	N/A	No	N/A	harvested stem / C stored in wood products	N/A	N/A	N/A	N/A	N/A	N/A	N/A	Energy from logging residues - post 2008 USFS wood utilization coefficients	1. The harvested woody biomass goes into products, energy, or uncollected waste. Sawlogs will be delivered to sawmills where dimensional lumber is the main product and chips are a secondary product.	N/A	1. Based on the average initial allocation of products over the past 30 years in which half of all timber products go into single family houses and half goes into multifamily buildings and other uses (McKeever and Howard 2011) and the estimated half-life of different types of wood products (Skog 2008), we calculated a 52-year half-life for wood products manufactured in California.	1. Based on 2006 California sawmill inventory results in Smith et al. (2009) and Keegan et al. (2010b), 75 percent of the delivered sawlogs ended up as wood products, 24 percent was used for energy, and 0.9 percent was uncollected waste. These more recent studies document a much more efficient process than the assumed 20 percent un- collected waste in Harmon et al. (1996) or the as- sumed 16 perc…	Used	1. A meta-analysis by Sathre and O’Connor (2010) of 21 international studies concluded that each ton of carbon in wood building products avoided an ad- ditional 1.1 tons of carbon emissions that would have occurred through producing more fossil fuel– intensive materials such as steel and cement	N/A	N/A	N/A	Negative	N/A	100 years	1. Clear-cut har- vest areas are replanted to meet state forest prac- tice laws and will not be harvested for decades. Partial cut harvest areas will typically be harvested periodically every 10 to 20 years	N/A	1. For our analysis, we assume that improved regulations and technology will result in 90 percent of future post- consumer wood going to engineered landfills or wood-fired energy plants	N/A	26 Estimated climate benefits in tons of CO2 equivalent (tCO2 eq) of harvested products from a 100-tCO2 eq representative harvest in Northern California	26	Estimated climate benefits in tons of CO2 equivalent (tCO2 eq) of harvested products from a 100-tCO2 eq representative harvest in Northern California	N/A	N/A	N/A	N/A	1. The majority of the additional climate benefits are related to direct and indirect energy substitution benefits that are tracked in the energy chapter rather than the forestry chapter in national and international greenhouse gas emission inventories (US Environmental Protection Agency 2012)	N/A	N/A
7	Stewart	Documenting the Full climate benefits of Harvested Wood Products in Northern California: Linking Harvests to the US Greenhouse Gas Inventory	2012	Harvest carbon store modeling	1. Using a representative sample of partial cut and clear-cut harvests from Northern California, we estimated the financial and climate benefits of the harvested products. 2. The goal of this study was to use project-level data from a region that exemplifies best practices in terms of efficient utilization of harvested products to test whether the divergence in outcomes is primarily related to as…	Sustainable Industrial	N/A	Northern CA	N/A	No	N/A	harvested stem / C stored in wood products	N/A	N/A	N/A	N/A	N/A	N/A	N/A	Energy from sawmill residues - post 2008 USFS wood utilization coefficients	1. The harvested woody biomass goes into products, energy, or uncollected waste. Sawlogs will be delivered to sawmills where dimensional lumber is the main product and chips are a secondary product.	N/A	1. Based on the average initial allocation of products over the past 30 years in which half of all timber products go into single family houses and half goes into multifamily buildings and other uses (McKeever and Howard 2011) and the estimated half-life of different types of wood products (Skog 2008), we calculated a 52-year half-life for wood products manufactured in California.	1. Based on 2006 California sawmill inventory results in Smith et al. (2009) and Keegan et al. (2010b), 75 percent of the delivered sawlogs ended up as wood products, 24 percent was used for energy, and 0.9 percent was uncollected waste. These more recent studies document a much more efficient process than the assumed 20 percent un- collected waste in Harmon et al. (1996) or the as- sumed 16 perc…	Used	1. A meta-analysis by Sathre and O’Connor (2010) of 21 international studies concluded that each ton of carbon in wood building products avoided an ad- ditional 1.1 tons of carbon emissions that would have occurred through producing more fossil fuel– intensive materials such as steel and cement	N/A	N/A	N/A	Negative	N/A	100 years	1. Clear-cut har- vest areas are replanted to meet state forest prac- tice laws and will not be harvested for decades. Partial cut harvest areas will typically be harvested periodically every 10 to 20 years	N/A	1. For our analysis, we assume that improved regulations and technology will result in 90 percent of future post- consumer wood going to engineered landfills or wood-fired energy plants	N/A	23 Estimated climate benefits in tons of CO2 equivalent (tCO2 eq) of harvested products from a 100-tCO2 eq representative harvest in Northern California	23	Estimated climate benefits in tons of CO2 equivalent (tCO2 eq) of harvested products from a 100-tCO2 eq representative harvest in Northern California	N/A	N/A	N/A	N/A	1. The majority of the additional climate benefits are related to direct and indirect energy substitution benefits that are tracked in the energy chapter rather than the forestry chapter in national and international greenhouse gas emission inventories (US Environmental Protection Agency 2012)	N/A	N/A
7	Stewart	Documenting the Full climate benefits of Harvested Wood Products in Northern California: Linking Harvests to the US Greenhouse Gas Inventory	2012	Harvest carbon store modeling	1. Using a representative sample of partial cut and clear-cut harvests from Northern California, we estimated the financial and climate benefits of the harvested products. 2. The goal of this study was to use project-level data from a region that exemplifies best practices in terms of efficient utilization of harvested products to test whether the divergence in outcomes is primarily related to as…	Sustainable Industrial	N/A	Northern CA	N/A	No	N/A	harvested stem / C stored in wood products	N/A	N/A	N/A	N/A	N/A	N/A	N/A	Energy from post-consumer residues - post 2008 USFS wood utilization coefficients	1. The harvested woody biomass goes into products, energy, or uncollected waste. Sawlogs will be delivered to sawmills where dimensional lumber is the main product and chips are a secondary product.	N/A	1. Based on the average initial allocation of products over the past 30 years in which half of all timber products go into single family houses and half goes into multifamily buildings and other uses (McKeever and Howard 2011) and the estimated half-life of different types of wood products (Skog 2008), we calculated a 52-year half-life for wood products manufactured in California.	1. Based on 2006 California sawmill inventory results in Smith et al. (2009) and Keegan et al. (2010b), 75 percent of the delivered sawlogs ended up as wood products, 24 percent was used for energy, and 0.9 percent was uncollected waste. These more recent studies document a much more efficient process than the assumed 20 percent un- collected waste in Harmon et al. (1996) or the as- sumed 16 perc…	Used	1. A meta-analysis by Sathre and O’Connor (2010) of 21 international studies concluded that each ton of carbon in wood building products avoided an ad- ditional 1.1 tons of carbon emissions that would have occurred through producing more fossil fuel– intensive materials such as steel and cement	N/A	N/A	N/A	Negative	N/A	100 years	1. Clear-cut har- vest areas are replanted to meet state forest prac- tice laws and will not be harvested for decades. Partial cut harvest areas will typically be harvested periodically every 10 to 20 years	N/A	1. For our analysis, we assume that improved regulations and technology will result in 90 percent of future post- consumer wood going to engineered landfills or wood-fired energy plants	N/A	11 Estimated climate benefits in tons of CO2 equivalent (tCO2 eq) of harvested products from a 100-tCO2 eq representative harvest in Northern California	11	Estimated climate benefits in tons of CO2 equivalent (tCO2 eq) of harvested products from a 100-tCO2 eq representative harvest in Northern California	N/A	N/A	N/A	N/A	1. The majority of the additional climate benefits are related to direct and indirect energy substitution benefits that are tracked in the energy chapter rather than the forestry chapter in national and international greenhouse gas emission inventories (US Environmental Protection Agency 2012)	N/A	N/A
7	Stewart	Documenting the Full climate benefits of Harvested Wood Products in Northern California: Linking Harvests to the US Greenhouse Gas Inventory	2012	Harvest carbon store modeling	1. Using a representative sample of partial cut and clear-cut harvests from Northern California, we estimated the financial and climate benefits of the harvested products. 2. The goal of this study was to use project-level data from a region that exemplifies best practices in terms of efficient utilization of harvested products to test whether the divergence in outcomes is primarily related to as…	Sustainable Industrial	N/A	Northern CA	N/A	No	N/A	harvested stem / C stored in wood products	N/A	N/A	N/A	N/A	N/A	N/A	N/A	Energy benefits from product substitution	1. The harvested woody biomass goes into products, energy, or uncollected waste. Sawlogs will be delivered to sawmills where dimensional lumber is the main product and chips are a secondary product.	N/A	1. Based on the average initial allocation of products over the past 30 years in which half of all timber products go into single family houses and half goes into multifamily buildings and other uses (McKeever and Howard 2011) and the estimated half-life of different types of wood products (Skog 2008), we calculated a 52-year half-life for wood products manufactured in California.	1. Based on 2006 California sawmill inventory results in Smith et al. (2009) and Keegan et al. (2010b), 75 percent of the delivered sawlogs ended up as wood products, 24 percent was used for energy, and 0.9 percent was uncollected waste. These more recent studies document a much more efficient process than the assumed 20 percent un- collected waste in Harmon et al. (1996) or the as- sumed 16 perc…	Used	1. A meta-analysis by Sathre and O’Connor (2010) of 21 international studies concluded that each ton of carbon in wood building products avoided an ad- ditional 1.1 tons of carbon emissions that would have occurred through producing more fossil fuel– intensive materials such as steel and cement	N/A	N/A	N/A	Negative	N/A	100 years	1. Clear-cut har- vest areas are replanted to meet state forest prac- tice laws and will not be harvested for decades. Partial cut harvest areas will typically be harvested periodically every 10 to 20 years	N/A	1. For our analysis, we assume that improved regulations and technology will result in 90 percent of future post- consumer wood going to engineered landfills or wood-fired energy plants	N/A	30 Estimated climate benefits in tons of CO2 equivalent (tCO2 eq) of harvested products from a 100-tCO2 eq representative harvest in Northern California	30	Estimated climate benefits in tons of CO2 equivalent (tCO2 eq) of harvested products from a 100-tCO2 eq representative harvest in Northern California	N/A	N/A	N/A	N/A	1. The majority of the additional climate benefits are related to direct and indirect energy substitution benefits that are tracked in the energy chapter rather than the forestry chapter in national and international greenhouse gas emission inventories (US Environmental Protection Agency 2012)	N/A	N/A
7	Stewart	Documenting the Full climate benefits of Harvested Wood Products in Northern California: Linking Harvests to the US Greenhouse Gas Inventory	2012	Harvest carbon store modeling	1. Using a representative sample of partial cut and clear-cut harvests from Northern California, we estimated the financial and climate benefits of the harvested products. 2. The goal of this study was to use project-level data from a region that exemplifies best practices in terms of efficient utilization of harvested products to test whether the divergence in outcomes is primarily related to as…	Sustainable Industrial	N/A	Northern CA	N/A	No	N/A	harvested stem / C stored in wood products	N/A	N/A	N/A	N/A	N/A	N/A	N/A	Total forest product related climate benefits (sum of above)	1. The harvested woody biomass goes into products, energy, or uncollected waste. Sawlogs will be delivered to sawmills where dimensional lumber is the main product and chips are a secondary product.	N/A	1. Based on the average initial allocation of products over the past 30 years in which half of all timber products go into single family houses and half goes into multifamily buildings and other uses (McKeever and Howard 2011) and the estimated half-life of different types of wood products (Skog 2008), we calculated a 52-year half-life for wood products manufactured in California.	1. Based on 2006 California sawmill inventory results in Smith et al. (2009) and Keegan et al. (2010b), 75 percent of the delivered sawlogs ended up as wood products, 24 percent was used for energy, and 0.9 percent was uncollected waste. These more recent studies document a much more efficient process than the assumed 20 percent un- collected waste in Harmon et al. (1996) or the as- sumed 16 perc…	Used	1. A meta-analysis by Sathre and O’Connor (2010) of 21 international studies concluded that each ton of carbon in wood building products avoided an ad- ditional 1.1 tons of carbon emissions that would have occurred through producing more fossil fuel– intensive materials such as steel and cement	N/A	N/A	N/A	Negative	N/A	100 years	1. Clear-cut har- vest areas are replanted to meet state forest prac- tice laws and will not be harvested for decades. Partial cut harvest areas will typically be harvested periodically every 10 to 20 years	N/A	1. For our analysis, we assume that improved regulations and technology will result in 90 percent of future post- consumer wood going to engineered landfills or wood-fired energy plants	N/A	123 Estimated climate benefits in tons of CO2 equivalent (tCO2 eq) of harvested products from a 100-tCO2 eq representative harvest in Northern California … versus 66 for pre-2008 USFS wood utilization coefficient	123	Estimated climate benefits in tons of CO2 equivalent (tCO2 eq) of harvested products from a 100-tCO2 eq representative harvest in Northern California	N/A	N/A	N/A	N/A	1. The majority of the additional climate benefits are related to direct and indirect energy substitution benefits that are tracked in the energy chapter rather than the forestry chapter in national and international greenhouse gas emission inventories (US Environmental Protection Agency 2012)	N/A	N/A
7	Lippke	Life cycle impacts of forest management and wood utilization on carbon mitigation: knowns and unknowns	2011	Life cycle carbon accounting	1. This review on research on life cycle carbon accounting examines the complexities in accounting for carbon emissions given the many different ways that wood is used. 2. The objective of this review is to show the extent to which recent research findings on life cycle carbon accounting across all stages of processing, from cradle-to-grave, can identify opportunities for carbon mitigation improv…	Sustainable Industrial	1.Impact of end-of-life strategies for products and buildings 2.Landfill emissions and methane capture from landfills 3. Soil carbon changes 4. Unmanaged forests, particularly the increasing rates of fire and consequent impact on both forest and product-carbon pools	Washington, PNW	Unsure	Yes	Consequential	roots, stem, crown, litter, dead	1. Forest soil carbon excluded assuming no change between rotations; roots, stem, crown, litter carbon pools included; Literature analyzes limited set of carbon pools with unintended consequences for un-analyzed pools; Carbon exchanges, regulations and incentives differ across countries but frequently reward one or more carbon pools independently resulting in counterproductive impacts on carbon e…	N/A	1. Reducing fire risks in unmanaged forests by thinning, while also producing biofuels and carbon stored in wood products, which also avoids many costs incurred in fighting fires and rehabilitating the land; Thinning treatments can restore forest health and double carbon stores; Increased wildfire expected due to climate change 2. Rate of fire on unmanaged lands much higher than on managed lands …	Mention of habitat preservation; Consequences on non-market ecosystem performance (i.e. habitat) pg. 321-322; increased intensity on currently managed lands has little impact but harvest on unmanaged old forest does	N/A	N/A	Unmanaged old forest	Industrial + Biofuel Displacement	Fuel	80	N/A	1. The US LCI mill survey data shows that approximately 50–70% of the aboveground biomass in a sustainably managed forest is currently utilized in product processing mills to make solid wood products along with paper and biofuel co-products. The remaining 30–50% (e.g., crown, litter and dead/breakage) is currently left to decay along with the roots to augment soil processes, be burnt, or provide …	Not used	1. Sustainably harvesting wood from the forest before growth slows down and storing the carbon in wood products while offsetting fossil fuel consumption; The goal of reducing GHGs suggests displacing the one-way flow of GHGs from fossil fuel-intensive products with forest products and biofuels from carbon-neutral forests; While afforestation provides a one-time increase in forest carbon, life cyc…	N/A	N/A	45 years	Negative	1. Extending harvest rotations beyond period of fast growth reduces volume and value of sustainably produced resources (that can be used to store carbon and displace fossil fuels) and reduces absorption of carbon from the atmosphere	180 years (4 rotations)	N/A	N/A	1. End of life products incinerated without energy recovery, recycling, or landfill (conservative) Figure 4	1. Equal soil carbon 2. Equal rates of decomposotion of dead material	At about 75 years, managed forest is surpassing unmanaged forest in carbon storage (unmanaged max ~200 Metric tons C per ha; managed max ~275); Figures 3 and 4; (total carbon stores)	N/A	N/A	1. Emissions from burning biomass for energy and the products produced from forest removals are being offset by the sustained growth in forest carbon removed from the atmosphere even after deducting any emissions from unused dead wood left in the forest 2. Increase use of renewable fuels	1. The energy required & emissions produced to collect biomass currently left in the forest is low; European experience shows that fossil fuel energy inputs for recovering and transporting harvest residues are approximately 3–5% of the available energy in the recovered biomass; It is the comparatively low cost of fossil fuels that limits the collection of forest residuals or other wood wastes tha…	1. We note that carbon mitigation impacts on ecosystem services affecting their non-market values can be significant; tradeoffs between ecosystem metrics (ecosystem service protection) and carbon mitigation are more critical for unmanaged than sustainably managed commercial forests; Consequences on non-market ecosystem performance (i.e. habitat) pg. 321-322; it is less costly to manage lands to p…	1. Store carbon in the forest, knowing that ultimately, the rate that carbon is removed from the atmosphere through net new growth will slow down, and in the event of a disturbance may emit more carbon than if harvested	1. Sustainably managed forests provide the opportunity to sustain a maximum rate of carbon absorption; the dominant source of carbon mitigation comes from sustainably displacing fossil emissions through the use of wood since the carbon stored in the forest is a one-time creation and can only contribute to sustainably reducing carbon emissions by harvesting the wood to substitute for other materia…	1. Urea fertilization: Yanai et al. also suggest that SOC may actually be increased with appropriate management inputs for example, an application of urea fertilization as part of the management regime has been shown to increase both forest productivity and soil carbon accumulation for some soils; Adams et al. found urea fertilization increased site productivity resulting in increases in both abo…	N/A
7	Lippke	Life cycle impacts of forest management and wood utilization on carbon mitigation: knowns and unknowns	2011	Life cycle carbon accounting	1. This review on research on life cycle carbon accounting examines the complexities in accounting for carbon emissions given the many different ways that wood is used. 2. The objective of this review is to show the extent to which recent research findings on life cycle carbon accounting across all stages of processing, from cradle-to-grave, can identify opportunities for carbon mitigation improv…	Sustainable Industrial	1.Impact of end-of-life strategies for products and buildings 2.Landfill emissions and methane capture from landfills 3. Soil carbon changes 4. Unmanaged forests, particularly the increasing rates of fire and consequent impact on both forest and product-carbon pools	Washington, PNW	Unsure	Yes	Consequential	roots, stem, crown, litter, dead	1. Forest soil carbon excluded assuming no change between rotations; roots, stem, crown, litter carbon pools included; Literature analyzes limited set of carbon pools with unintended consequences for un-analyzed pools; Carbon exchanges, regulations and incentives differ across countries but frequently reward one or more carbon pools independently resulting in counterproductive impacts on carbon e…	N/A	1. Reducing fire risks in unmanaged forests by thinning, while also producing biofuels and carbon stored in wood products, which also avoids many costs incurred in fighting fires and rehabilitating the land; Thinning treatments can restore forest health and double carbon stores; Increased wildfire expected due to climate change 2. Rate of fire on unmanaged lands much higher than on managed lands …	Mention of habitat preservation; Consequences on non-market ecosystem performance (i.e. habitat) pg. 321-322; increased intensity on currently managed lands has little impact but harvest on unmanaged old forest does	N/A	N/A	Unmanaged old forest	Industrial + Biofuel Displacement + Substitution	Softwood lumber	80	N/A	1. The US LCI mill survey data shows that approximately 50–70% of the aboveground biomass in a sustainably managed forest is currently utilized in product processing mills to make solid wood products along with paper and biofuel co-products. The remaining 30–50% (e.g., crown, litter and dead/breakage) is currently left to decay along with the roots to augment soil processes, be burnt, or provide …	Average Substitution 1. Not a direct substitution (Product A and B); But average range of substitution impacts (to displace materials like steel and concrete) per unit of wood products produced 2. Included was: biofuel displacing natural gas in processing mills 3. Excluded was: short-lived co-products outside of wood product LCI boundary	1. Sustainably harvesting wood from the forest before growth slows down and storing the carbon in wood products while offsetting fossil fuel consumption; The goal of reducing GHGs suggests displacing the one-way flow of GHGs from fossil fuel-intensive products with forest products and biofuels from carbon-neutral forests; While afforestation provides a one-time increase in forest carbon, life cyc…	N/A	N/A	45 years	Negative	1. Extending harvest rotations beyond period of fast growth reduces volume and value of sustainably produced resources (that can be used to store carbon and displace fossil fuels) and reduces absorption of carbon from the atmosphere	180 years (4 rotations)	N/A	N/A	1. End of life products incinerated without energy recovery, recycling, or landfill (conservative) Figure 5	1. Equal soil carbon 2. Equal rates of decomposotion of dead material 3. Harvest removals maximized contrained by sustainable removal rates 4. Landfill stores not included	unmanaged max ~200 Metric tons C per ha; managed max >700; Figure 6; (total carbon stores)	N/A	N/A	1. Emissions from burning biomass for energy and the products produced from forest removals are being offset by the sustained growth in forest carbon removed from the atmosphere even after deducting any emissions from unused dead wood left in the forest 2. Increase use of renewable fuels	1. The energy required & emissions produced to collect biomass currently left in the forest is low; European experience shows that fossil fuel energy inputs for recovering and transporting harvest residues are approximately 3–5% of the available energy in the recovered biomass; It is the comparatively low cost of fossil fuels that limits the collection of forest residuals or other wood wastes tha…	1. We note that carbon mitigation impacts on ecosystem services affecting their non-market values can be significant; tradeoffs between ecosystem metrics (ecosystem service protection) and carbon mitigation are more critical for unmanaged than sustainably managed commercial forests; Consequences on non-market ecosystem performance (i.e. habitat) pg. 321-322; it is less costly to manage lands to p…	1. Store carbon in the forest, knowing that ultimately, the rate that carbon is removed from the atmosphere through net new growth will slow down, and in the event of a disturbance may emit more carbon than if harvested	1. Sustainably managed forests provide the opportunity to sustain a maximum rate of carbon absorption; the dominant source of carbon mitigation comes from sustainably displacing fossil emissions through the use of wood since the carbon stored in the forest is a one-time creation and can only contribute to sustainably reducing carbon emissions by harvesting the wood to substitute for other materia…	1. Urea fertilization: Yanai et al. also suggest that SOC may actually be increased with appropriate management inputs for example, an application of urea fertilization as part of the management regime has been shown to increase both forest productivity and soil carbon accumulation for some soils; Adams et al. found urea fertilization increased site productivity resulting in increases in both abo…	N/A
7	Lippke	Life cycle impacts of forest management and wood utilization on carbon mitigation: knowns and unknowns	2011	Life cycle carbon accounting	1. This review on research on life cycle carbon accounting examines the complexities in accounting for carbon emissions given the many different ways that wood is used. 2. The objective of this review is to show the extent to which recent research findings on life cycle carbon accounting across all stages of processing, from cradle-to-grave, can identify opportunities for carbon mitigation improv…	Sustainable Industrial	1.Impact of end-of-life strategies for products and buildings 2.Landfill emissions and methane capture from landfills 3. Soil carbon changes 4. Unmanaged forests, particularly the increasing rates of fire and consequent impact on both forest and product-carbon pools	Washington, PNW	Unsure	Yes	Consequential	roots, stem, crown, litter, dead	1. Forest soil carbon excluded assuming no change between rotations; roots, stem, crown, litter carbon pools included; Literature analyzes limited set of carbon pools with unintended consequences for un-analyzed pools; Carbon exchanges, regulations and incentives differ across countries but frequently reward one or more carbon pools independently resulting in counterproductive impacts on carbon e…	N/A	1. Reducing fire risks in unmanaged forests by thinning, while also producing biofuels and carbon stored in wood products, which also avoids many costs incurred in fighting fires and rehabilitating the land; Thinning treatments can restore forest health and double carbon stores; Increased wildfire expected due to climate change 2. Rate of fire on unmanaged lands much higher than on managed lands …	Mention of habitat preservation; Consequences on non-market ecosystem performance (i.e. habitat) pg. 321-322; increased intensity on currently managed lands has little impact but harvest on unmanaged old forest does	N/A	N/A	Unmanaged old forest	Industrial + High Substitution (Engineerd Wood Product I-joist vs. Steel)	Softwood lumber	80	N/A	1. The US LCI mill survey data shows that approximately 50–70% of the aboveground biomass in a sustainably managed forest is currently utilized in product processing mills to make solid wood products along with paper and biofuel co-products. The remaining 30–50% (e.g., crown, litter and dead/breakage) is currently left to decay along with the roots to augment soil processes, be burnt, or provide …	Engineered Wood Product I-Joist	1. Sustainably harvesting wood from the forest before growth slows down and storing the carbon in wood products while offsetting fossil fuel consumption; The goal of reducing GHGs suggests displacing the one-way flow of GHGs from fossil fuel-intensive products with forest products and biofuels from carbon-neutral forests; While afforestation provides a one-time increase in forest carbon, life cyc…	N/A	N/A	45 years	Negative	1. Extending harvest rotations beyond period of fast growth reduces volume and value of sustainably produced resources (that can be used to store carbon and displace fossil fuels) and reduces absorption of carbon from the atmosphere	180 years (4 rotations)	N/A	N/A	1. End of life products incinerated without energy recovery, recycling, or landfill (conservative) Figure 6	1. Equal soil carbon 2. Equal rates of decomposotion of dead material 3. Coproducts of high-grade residuals for composite products, pulp chips, biofuels consumed internally 4. Landfill stores not included	Unmanaged forest sustained growth rate (tC/ha/yr; %) = 0; high sub = 9.7% (Table 1)	N/A	N/A	1. Emissions from burning biomass for energy and the products produced from forest removals are being offset by the sustained growth in forest carbon removed from the atmosphere even after deducting any emissions from unused dead wood left in the forest 2. Increase use of renewable fuels	1. The energy required & emissions produced to collect biomass currently left in the forest is low; European experience shows that fossil fuel energy inputs for recovering and transporting harvest residues are approximately 3–5% of the available energy in the recovered biomass; It is the comparatively low cost of fossil fuels that limits the collection of forest residuals or other wood wastes tha…	1. We note that carbon mitigation impacts on ecosystem services affecting their non-market values can be significant; tradeoffs between ecosystem metrics (ecosystem service protection) and carbon mitigation are more critical for unmanaged than sustainably managed commercial forests; Consequences on non-market ecosystem performance (i.e. habitat) pg. 321-322; it is less costly to manage lands to p…	1. Store carbon in the forest, knowing that ultimately, the rate that carbon is removed from the atmosphere through net new growth will slow down, and in the event of a disturbance may emit more carbon than if harvested	1. Sustainably managed forests provide the opportunity to sustain a maximum rate of carbon absorption; the dominant source of carbon mitigation comes from sustainably displacing fossil emissions through the use of wood since the carbon stored in the forest is a one-time creation and can only contribute to sustainably reducing carbon emissions by harvesting the wood to substitute for other materia…	1. Urea fertilization: Yanai et al. also suggest that SOC may actually be increased with appropriate management inputs for example, an application of urea fertilization as part of the management regime has been shown to increase both forest productivity and soil carbon accumulation for some soils; Adams et al. found urea fertilization increased site productivity resulting in increases in both abo…	N/A
8	Lippke	Life cycle impacts of forest management and wood utilization on carbon mitigation: knowns and unknowns	2011	Life cycle carbon accounting	1. This review on research on life cycle carbon accounting examines the complexities in accounting for carbon emissions given the many different ways that wood is used. 2. The objective of this review is to show the extent to which recent research findings on life cycle carbon accounting across all stages of processing, from cradle-to-grave, can identify opportunities for carbon mitigation improv…	Sustainable Industrial	1.Impact of end-of-life strategies for products and buildings 2.Landfill emissions and methane capture from landfills 3. Soil carbon changes 4. Unmanaged forests, particularly the increasing rates of fire and consequent impact on both forest and product-carbon pools	Washington, PNW	Unsure	Yes	Consequential	roots, stem, crown, litter, dead	1. Forest soil carbon excluded assuming no change between rotations; roots, stem, crown, litter carbon pools included; Literature analyzes limited set of carbon pools with unintended consequences for un-analyzed pools; Carbon exchanges, regulations and incentives differ across countries but frequently reward one or more carbon pools independently resulting in counterproductive impacts on carbon e…	N/A	1. Reducing fire risks in unmanaged forests by thinning, while also producing biofuels and carbon stored in wood products, which also avoids many costs incurred in fighting fires and rehabilitating the land; Thinning treatments can restore forest health and double carbon stores; Increased wildfire expected due to climate change 2. Rate of fire on unmanaged lands much higher than on managed lands …	Mention of habitat preservation; Consequences on non-market ecosystem performance (i.e. habitat) pg. 321-322; increased intensity on currently managed lands has little impact but harvest on unmanaged old forest does	N/A	N/A	Unmanaged old forest	Industrial + Low Substitution (Biofuel Production)	Softwood lumber	80	N/A	1. The US LCI mill survey data shows that approximately 50–70% of the aboveground biomass in a sustainably managed forest is currently utilized in product processing mills to make solid wood products along with paper and biofuel co-products. The remaining 30–50% (e.g., crown, litter and dead/breakage) is currently left to decay along with the roots to augment soil processes, be burnt, or provide …	Biofuel Production	1. Sustainably harvesting wood from the forest before growth slows down and storing the carbon in wood products while offsetting fossil fuel consumption; The goal of reducing GHGs suggests displacing the one-way flow of GHGs from fossil fuel-intensive products with forest products and biofuels from carbon-neutral forests; While afforestation provides a one-time increase in forest carbon, life cyc…	N/A	N/A	45 years	Negative	1. Extending harvest rotations beyond period of fast growth reduces volume and value of sustainably produced resources (that can be used to store carbon and displace fossil fuels) and reduces absorption of carbon from the atmosphere	180 years (4 rotations)	N/A	N/A	1. End of life products incinerated without energy recovery, recycling, or landfill (conservative) Figure 7	1. Equal soil carbon 2. Equal rates of decomposotion of dead material 3. Coproducts of high-grade residuals for composite products, pulp chips, biofuels consumed internally 4. Landfill stores not included	Unmanaged forest sustained growth rate (tC/ha/yr; %) = 0; low sub = 2.9% (Table 1)	N/A	N/A	1. Emissions from burning biomass for energy and the products produced from forest removals are being offset by the sustained growth in forest carbon removed from the atmosphere even after deducting any emissions from unused dead wood left in the forest 2. Increase use of renewable fuels	1. The energy required & emissions produced to collect biomass currently left in the forest is low; European experience shows that fossil fuel energy inputs for recovering and transporting harvest residues are approximately 3–5% of the available energy in the recovered biomass; It is the comparatively low cost of fossil fuels that limits the collection of forest residuals or other wood wastes tha…	1. We note that carbon mitigation impacts on ecosystem services affecting their non-market values can be significant; tradeoffs between ecosystem metrics (ecosystem service protection) and carbon mitigation are more critical for unmanaged than sustainably managed commercial forests; Consequences on non-market ecosystem performance (i.e. habitat) pg. 321-322; it is less costly to manage lands to p…	1. Store carbon in the forest, knowing that ultimately, the rate that carbon is removed from the atmosphere through net new growth will slow down, and in the event of a disturbance may emit more carbon than if harvested	1. Sustainably managed forests provide the opportunity to sustain a maximum rate of carbon absorption; the dominant source of carbon mitigation comes from sustainably displacing fossil emissions through the use of wood since the carbon stored in the forest is a one-time creation and can only contribute to sustainably reducing carbon emissions by harvesting the wood to substitute for other materia…	1. Urea fertilization: Yanai et al. also suggest that SOC may actually be increased with appropriate management inputs for example, an application of urea fertilization as part of the management regime has been shown to increase both forest productivity and soil carbon accumulation for some soils; Adams et al. found urea fertilization increased site productivity resulting in increases in both abo…	N/A
9	Lippke	Life cycle impacts of forest management and wood utilization on carbon mitigation: knowns and unknowns	2011	Life cycle carbon accounting	1. This review on research on life cycle carbon accounting examines the complexities in accounting for carbon emissions given the many different ways that wood is used. 2. The objective of this review is to show the extent to which recent research findings on life cycle carbon accounting across all stages of processing, from cradle-to-grave, can identify opportunities for carbon mitigation improv…	Sustainable Industrial	1.Impact of end-of-life strategies for products and buildings 2.Landfill emissions and methane capture from landfills 3. Soil carbon changes 4. Unmanaged forests, particularly the increasing rates of fire and consequent impact on both forest and product-carbon pools	Washington, PNW	Unsure	Yes	Consequential	roots, stem, crown, litter, dead	1. Forest soil carbon excluded assuming no change between rotations; roots, stem, crown, litter carbon pools included; Literature analyzes limited set of carbon pools with unintended consequences for un-analyzed pools; Carbon exchanges, regulations and incentives differ across countries but frequently reward one or more carbon pools independently resulting in counterproductive impacts on carbon e…	N/A	1. Reducing fire risks in unmanaged forests by thinning, while also producing biofuels and carbon stored in wood products, which also avoids many costs incurred in fighting fires and rehabilitating the land; Thinning treatments can restore forest health and double carbon stores; Increased wildfire expected due to climate change 2. Rate of fire on unmanaged lands much higher than on managed lands …	Mention of habitat preservation; Consequences on non-market ecosystem performance (i.e. habitat) pg. 321-322; increased intensity on currently managed lands has little impact but harvest on unmanaged old forest does	N/A	N/A	Unmanaged old forest	Base Industrial + Average Substitution	Softwood lumber	80	N/A	1. The US LCI mill survey data shows that approximately 50–70% of the aboveground biomass in a sustainably managed forest is currently utilized in product processing mills to make solid wood products along with paper and biofuel co-products. The remaining 30–50% (e.g., crown, litter and dead/breakage) is currently left to decay along with the roots to augment soil processes, be burnt, or provide …	Average Substitution 1. Not a direct substitution (Product A and B); But average range of substitution impacts (to displace materials like steel and concrete) per unit of wood products produced 2. Included was: biofuel displacing natural gas in processing mills 3. Excluded was: short-lived co-products outside of wood product LCI boundary	1. Sustainably harvesting wood from the forest before growth slows down and storing the carbon in wood products while offsetting fossil fuel consumption; The goal of reducing GHGs suggests displacing the one-way flow of GHGs from fossil fuel-intensive products with forest products and biofuels from carbon-neutral forests; While afforestation provides a one-time increase in forest carbon, life cyc…	N/A	N/A	45 years	Negative	1. Extending harvest rotations beyond period of fast growth reduces volume and value of sustainably produced resources (that can be used to store carbon and displace fossil fuels) and reduces absorption of carbon from the atmosphere	180 years (4 rotations)	N/A	N/A	1. End of life products incinerated without energy recovery, recycling, or landfill (conservative) Figure 8	1. Equal soil carbon 2. Equal rates of decomposotion of dead material 3. Coproducts of high-grade residuals for composite products, pulp chips, biofuels consumed internally 4. Landfill stores not included	Unmanaged forest sustained growth rate (tC/ha/yr; %) = 0; base avg. sub = 4.2% (Table 1)	N/A	N/A	1. Emissions from burning biomass for energy and the products produced from forest removals are being offset by the sustained growth in forest carbon removed from the atmosphere even after deducting any emissions from unused dead wood left in the forest 2. Increase use of renewable fuels	1. The energy required & emissions produced to collect biomass currently left in the forest is low; European experience shows that fossil fuel energy inputs for recovering and transporting harvest residues are approximately 3–5% of the available energy in the recovered biomass; It is the comparatively low cost of fossil fuels that limits the collection of forest residuals or other wood wastes tha…	1. We note that carbon mitigation impacts on ecosystem services affecting their non-market values can be significant; tradeoffs between ecosystem metrics (ecosystem service protection) and carbon mitigation are more critical for unmanaged than sustainably managed commercial forests; Consequences on non-market ecosystem performance (i.e. habitat) pg. 321-322; it is less costly to manage lands to p…	1. Store carbon in the forest, knowing that ultimately, the rate that carbon is removed from the atmosphere through net new growth will slow down, and in the event of a disturbance may emit more carbon than if harvested	1. Sustainably managed forests provide the opportunity to sustain a maximum rate of carbon absorption; the dominant source of carbon mitigation comes from sustainably displacing fossil emissions through the use of wood since the carbon stored in the forest is a one-time creation and can only contribute to sustainably reducing carbon emissions by harvesting the wood to substitute for other materia…	1. Urea fertilization: Yanai et al. also suggest that SOC may actually be increased with appropriate management inputs for example, an application of urea fertilization as part of the management regime has been shown to increase both forest productivity and soil carbon accumulation for some soils; Adams et al. found urea fertilization increased site productivity resulting in increases in both abo…	N/A
9	Lippke	Life cycle impacts of forest management and wood utilization on carbon mitigation: knowns and unknowns	2011	Life cycle carbon accounting	1. This review on research on life cycle carbon accounting examines the complexities in accounting for carbon emissions given the many different ways that wood is used. 2. The objective of this review is to show the extent to which recent research findings on life cycle carbon accounting across all stages of processing, from cradle-to-grave, can identify opportunities for carbon mitigation improv…	Sustainable Industrial	1.Impact of end-of-life strategies for products and buildings 2.Landfill emissions and methane capture from landfills 3. Soil carbon changes 4. Unmanaged forests, particularly the increasing rates of fire and consequent impact on both forest and product-carbon pools	Washington, PNW	Unsure	Yes	Consequential	roots, stem, crown, litter, dead	1. Forest soil carbon excluded assuming no change between rotations; roots, stem, crown, litter carbon pools included; Literature analyzes limited set of carbon pools with unintended consequences for un-analyzed pools; Carbon exchanges, regulations and incentives differ across countries but frequently reward one or more carbon pools independently resulting in counterproductive impacts on carbon e…	N/A	1. Reducing fire risks in unmanaged forests by thinning, while also producing biofuels and carbon stored in wood products, which also avoids many costs incurred in fighting fires and rehabilitating the land; Thinning treatments can restore forest health and double carbon stores; Increased wildfire expected due to climate change 2. Rate of fire on unmanaged lands much higher than on managed lands …	Mention of habitat preservation; Consequences on non-market ecosystem performance (i.e. habitat) pg. 321-322; increased intensity on currently managed lands has little impact but harvest on unmanaged old forest does	N/A	N/A	Unmanaged old forest	Intensive Industrial + Average Substitution	Softwood lumber	80	N/A	1. The US LCI mill survey data shows that approximately 50–70% of the aboveground biomass in a sustainably managed forest is currently utilized in product processing mills to make solid wood products along with paper and biofuel co-products. The remaining 30–50% (e.g., crown, litter and dead/breakage) is currently left to decay along with the roots to augment soil processes, be burnt, or provide …	Average Substitution 1. Not a direct substitution (Product A and B); But average range of substitution impacts (to displace materials like steel and concrete) per unit of wood products produced 2. Included was: biofuel displacing natural gas in processing mills 3. Excluded was: short-lived co-products outside of wood product LCI boundary	1. Sustainably harvesting wood from the forest before growth slows down and storing the carbon in wood products while offsetting fossil fuel consumption; The goal of reducing GHGs suggests displacing the one-way flow of GHGs from fossil fuel-intensive products with forest products and biofuels from carbon-neutral forests; While afforestation provides a one-time increase in forest carbon, life cyc…	N/A	N/A	45 years	Negative	1. Extending harvest rotations beyond period of fast growth reduces volume and value of sustainably produced resources (that can be used to store carbon and displace fossil fuels) and reduces absorption of carbon from the atmosphere	180 years (4 rotations)	N/A	N/A	1. End of life products incinerated without energy recovery, recycling, or landfill (conservative) Figure 9	1. Equal soil carbon 2. Equal rates of decomposotion of dead material 3. Coproducts of high-grade residuals for composite products, pulp chips, biofuels consumed internally 4. Landfill stores not included	Unmanaged forest sustained growth rate (tC/ha/yr; %) = 0; lintensive avg sub = 5% (Table 1)	N/A	N/A	1. Emissions from burning biomass for energy and the products produced from forest removals are being offset by the sustained growth in forest carbon removed from the atmosphere even after deducting any emissions from unused dead wood left in the forest 2. Increase use of renewable fuels	1. The energy required & emissions produced to collect biomass currently left in the forest is low; European experience shows that fossil fuel energy inputs for recovering and transporting harvest residues are approximately 3–5% of the available energy in the recovered biomass; It is the comparatively low cost of fossil fuels that limits the collection of forest residuals or other wood wastes tha…	1. We note that carbon mitigation impacts on ecosystem services affecting their non-market values can be significant; tradeoffs between ecosystem metrics (ecosystem service protection) and carbon mitigation are more critical for unmanaged than sustainably managed commercial forests; Consequences on non-market ecosystem performance (i.e. habitat) pg. 321-322; it is less costly to manage lands to p…	1. Store carbon in the forest, knowing that ultimately, the rate that carbon is removed from the atmosphere through net new growth will slow down, and in the event of a disturbance may emit more carbon than if harvested	1. Sustainably managed forests provide the opportunity to sustain a maximum rate of carbon absorption; the dominant source of carbon mitigation comes from sustainably displacing fossil emissions through the use of wood since the carbon stored in the forest is a one-time creation and can only contribute to sustainably reducing carbon emissions by harvesting the wood to substitute for other materia…	1. Urea fertilization: Yanai et al. also suggest that SOC may actually be increased with appropriate management inputs for example, an application of urea fertilization as part of the management regime has been shown to increase both forest productivity and soil carbon accumulation for some soils; Adams et al. found urea fertilization increased site productivity resulting in increases in both abo…	N/A
9	Lippke	Life cycle impacts of forest management and wood utilization on carbon mitigation: knowns and unknowns	2011	Life cycle carbon accounting	1. This review on research on life cycle carbon accounting examines the complexities in accounting for carbon emissions given the many different ways that wood is used. 2. The objective of this review is to show the extent to which recent research findings on life cycle carbon accounting across all stages of processing, from cradle-to-grave, can identify opportunities for carbon mitigation improv…	Sustainable Industrial	1.Impact of end-of-life strategies for products and buildings 2.Landfill emissions and methane capture from landfills 3. Soil carbon changes 4. Unmanaged forests, particularly the increasing rates of fire and consequent impact on both forest and product-carbon pools	Washington, PNW	Unsure	Yes	Consequential	roots, stem, crown, litter, dead	1. Forest soil carbon excluded assuming no change between rotations; roots, stem, crown, litter carbon pools included; Literature analyzes limited set of carbon pools with unintended consequences for un-analyzed pools; Carbon exchanges, regulations and incentives differ across countries but frequently reward one or more carbon pools independently resulting in counterproductive impacts on carbon e…	N/A	1. Reducing fire risks in unmanaged forests by thinning, while also producing biofuels and carbon stored in wood products, which also avoids many costs incurred in fighting fires and rehabilitating the land; Thinning treatments can restore forest health and double carbon stores; Increased wildfire expected due to climate change 2. Rate of fire on unmanaged lands much higher than on managed lands …	Mention of habitat preservation; Consequences on non-market ecosystem performance (i.e. habitat) pg. 321-322; increased intensity on currently managed lands has little impact but harvest on unmanaged old forest does	N/A	N/A	N/A	Industrial + Biofuel Displacement + Substitution PNW PRIVATE	Softwood lumber	80	N/A	1. The US LCI mill survey data shows that approximately 50–70% of the aboveground biomass in a sustainably managed forest is currently utilized in product processing mills to make solid wood products along with paper and biofuel co-products. The remaining 30–50% (e.g., crown, litter and dead/breakage) is currently left to decay along with the roots to augment soil processes, be burnt, or provide …	Average Substitution 1. Not a direct substitution (Product A and B); But average range of substitution impacts (to displace materials like steel and concrete) per unit of wood products produced 2. Included was: biofuel displacing natural gas in processing mills 3. Excluded was: short-lived co-products outside of wood product LCI boundary	1. Sustainably harvesting wood from the forest before growth slows down and storing the carbon in wood products while offsetting fossil fuel consumption; The goal of reducing GHGs suggests displacing the one-way flow of GHGs from fossil fuel-intensive products with forest products and biofuels from carbon-neutral forests; While afforestation provides a one-time increase in forest carbon, life cyc…	N/A	N/A	45 years	Negative	1. Extending harvest rotations beyond period of fast growth reduces volume and value of sustainably produced resources (that can be used to store carbon and displace fossil fuels) and reduces absorption of carbon from the atmosphere	100 years	N/A	N/A	1. End of life products incinerated without energy recovery, recycling, or landfill (conservative) Figure 10	1. Equal soil carbon 2. Equal rates of decomposotion of dead material	500 metric tons C per ha (total carbon stores)	N/A	N/A	1. Emissions from burning biomass for energy and the products produced from forest removals are being offset by the sustained growth in forest carbon removed from the atmosphere even after deducting any emissions from unused dead wood left in the forest 2. Increase use of renewable fuels	1. The energy required & emissions produced to collect biomass currently left in the forest is low; European experience shows that fossil fuel energy inputs for recovering and transporting harvest residues are approximately 3–5% of the available energy in the recovered biomass; It is the comparatively low cost of fossil fuels that limits the collection of forest residuals or other wood wastes tha…	1. We note that carbon mitigation impacts on ecosystem services affecting their non-market values can be significant; tradeoffs between ecosystem metrics (ecosystem service protection) and carbon mitigation are more critical for unmanaged than sustainably managed commercial forests; Consequences on non-market ecosystem performance (i.e. habitat) pg. 321-322; it is less costly to manage lands to p…	1. Store carbon in the forest, knowing that ultimately, the rate that carbon is removed from the atmosphere through net new growth will slow down, and in the event of a disturbance may emit more carbon than if harvested	1. Sustainably managed forests provide the opportunity to sustain a maximum rate of carbon absorption; the dominant source of carbon mitigation comes from sustainably displacing fossil emissions through the use of wood since the carbon stored in the forest is a one-time creation and can only contribute to sustainably reducing carbon emissions by harvesting the wood to substitute for other materia…	1. Urea fertilization: Yanai et al. also suggest that SOC may actually be increased with appropriate management inputs for example, an application of urea fertilization as part of the management regime has been shown to increase both forest productivity and soil carbon accumulation for some soils; Adams et al. found urea fertilization increased site productivity resulting in increases in both abo…	N/A
9	Lippke	Life cycle impacts of forest management and wood utilization on carbon mitigation: knowns and unknowns	2011	Life cycle carbon accounting	1. This review on research on life cycle carbon accounting examines the complexities in accounting for carbon emissions given the many different ways that wood is used. 2. The objective of this review is to show the extent to which recent research findings on life cycle carbon accounting across all stages of processing, from cradle-to-grave, can identify opportunities for carbon mitigation improv…	Sustainable Industrial	1.Impact of end-of-life strategies for products and buildings 2.Landfill emissions and methane capture from landfills 3. Soil carbon changes 4. Unmanaged forests, particularly the increasing rates of fire and consequent impact on both forest and product-carbon pools	Washington, PNW	Unsure	Yes	Consequential	roots, stem, crown, litter, dead	1. Forest soil carbon excluded assuming no change between rotations; roots, stem, crown, litter carbon pools included; Literature analyzes limited set of carbon pools with unintended consequences for un-analyzed pools; Carbon exchanges, regulations and incentives differ across countries but frequently reward one or more carbon pools independently resulting in counterproductive impacts on carbon e…	N/A	1. Reducing fire risks in unmanaged forests by thinning, while also producing biofuels and carbon stored in wood products, which also avoids many costs incurred in fighting fires and rehabilitating the land; Thinning treatments can restore forest health and double carbon stores; Increased wildfire expected due to climate change 2. Rate of fire on unmanaged lands much higher than on managed lands …	Mention of habitat preservation; Consequences on non-market ecosystem performance (i.e. habitat) pg. 321-322; increased intensity on currently managed lands has little impact but harvest on unmanaged old forest does	N/A	N/A	N/A	Industrial + Biofuel Displacement + Substitution INLAND PRIVATE	Softwood lumber	80	N/A	1. The US LCI mill survey data shows that approximately 50–70% of the aboveground biomass in a sustainably managed forest is currently utilized in product processing mills to make solid wood products along with paper and biofuel co-products. The remaining 30–50% (e.g., crown, litter and dead/breakage) is currently left to decay along with the roots to augment soil processes, be burnt, or provide …	Average Substitution 1. Not a direct substitution (Product A and B); But average range of substitution impacts (to displace materials like steel and concrete) per unit of wood products produced 2. Included was: biofuel displacing natural gas in processing mills 3. Excluded was: short-lived co-products outside of wood product LCI boundary	1. Sustainably harvesting wood from the forest before growth slows down and storing the carbon in wood products while offsetting fossil fuel consumption; The goal of reducing GHGs suggests displacing the one-way flow of GHGs from fossil fuel-intensive products with forest products and biofuels from carbon-neutral forests; While afforestation provides a one-time increase in forest carbon, life cyc…	N/A	N/A	45 years	Negative	1. Extending harvest rotations beyond period of fast growth reduces volume and value of sustainably produced resources (that can be used to store carbon and displace fossil fuels) and reduces absorption of carbon from the atmosphere	100 years	N/A	N/A	1. End of life products incinerated without energy recovery, recycling, or landfill (conservative) Figure 11	1. Equal soil carbon 2. Equal rates of decomposotion of dead material	300 metric tons C per ha (total carbon stores)	N/A	N/A	1. Emissions from burning biomass for energy and the products produced from forest removals are being offset by the sustained growth in forest carbon removed from the atmosphere even after deducting any emissions from unused dead wood left in the forest 2. Increase use of renewable fuels	1. The energy required & emissions produced to collect biomass currently left in the forest is low; European experience shows that fossil fuel energy inputs for recovering and transporting harvest residues are approximately 3–5% of the available energy in the recovered biomass; It is the comparatively low cost of fossil fuels that limits the collection of forest residuals or other wood wastes tha…	1. We note that carbon mitigation impacts on ecosystem services affecting their non-market values can be significant; tradeoffs between ecosystem metrics (ecosystem service protection) and carbon mitigation are more critical for unmanaged than sustainably managed commercial forests; Consequences on non-market ecosystem performance (i.e. habitat) pg. 321-322; it is less costly to manage lands to p…	1. Store carbon in the forest, knowing that ultimately, the rate that carbon is removed from the atmosphere through net new growth will slow down, and in the event of a disturbance may emit more carbon than if harvested	1. Sustainably managed forests provide the opportunity to sustain a maximum rate of carbon absorption; the dominant source of carbon mitigation comes from sustainably displacing fossil emissions through the use of wood since the carbon stored in the forest is a one-time creation and can only contribute to sustainably reducing carbon emissions by harvesting the wood to substitute for other materia…	1. Urea fertilization: Yanai et al. also suggest that SOC may actually be increased with appropriate management inputs for example, an application of urea fertilization as part of the management regime has been shown to increase both forest productivity and soil carbon accumulation for some soils; Adams et al. found urea fertilization increased site productivity resulting in increases in both abo…	N/A
9	Lippke	Life cycle impacts of forest management and wood utilization on carbon mitigation: knowns and unknowns	2011	Life cycle carbon accounting	1. This review on research on life cycle carbon accounting examines the complexities in accounting for carbon emissions given the many different ways that wood is used. 2. The objective of this review is to show the extent to which recent research findings on life cycle carbon accounting across all stages of processing, from cradle-to-grave, can identify opportunities for carbon mitigation improv…	Sustainable Industrial	1.Impact of end-of-life strategies for products and buildings 2.Landfill emissions and methane capture from landfills 3. Soil carbon changes 4. Unmanaged forests, particularly the increasing rates of fire and consequent impact on both forest and product-carbon pools	Washington, PNW	Unsure	Yes	Consequential	roots, stem, crown, litter, dead	1. Forest soil carbon excluded assuming no change between rotations; roots, stem, crown, litter carbon pools included; Literature analyzes limited set of carbon pools with unintended consequences for un-analyzed pools; Carbon exchanges, regulations and incentives differ across countries but frequently reward one or more carbon pools independently resulting in counterproductive impacts on carbon e…	N/A	1. Reducing fire risks in unmanaged forests by thinning, while also producing biofuels and carbon stored in wood products, which also avoids many costs incurred in fighting fires and rehabilitating the land; Thinning treatments can restore forest health and double carbon stores; Increased wildfire expected due to climate change 2. Rate of fire on unmanaged lands much higher than on managed lands …	Mention of habitat preservation; Consequences on non-market ecosystem performance (i.e. habitat) pg. 321-322; increased intensity on currently managed lands has little impact but harvest on unmanaged old forest does	N/A	N/A	N/A	Thinning	Softwood lumber	80	N/A	1. The US LCI mill survey data shows that approximately 50–70% of the aboveground biomass in a sustainably managed forest is currently utilized in product processing mills to make solid wood products along with paper and biofuel co-products. The remaining 30–50% (e.g., crown, litter and dead/breakage) is currently left to decay along with the roots to augment soil processes, be burnt, or provide …	Average Substitution 1. Not a direct substitution (Product A and B); But average range of substitution impacts (to displace materials like steel and concrete) per unit of wood products produced 2. Included was: biofuel displacing natural gas in processing mills 3. Excluded was: short-lived co-products outside of wood product LCI boundary	1. Sustainably harvesting wood from the forest before growth slows down and storing the carbon in wood products while offsetting fossil fuel consumption; The goal of reducing GHGs suggests displacing the one-way flow of GHGs from fossil fuel-intensive products with forest products and biofuels from carbon-neutral forests; While afforestation provides a one-time increase in forest carbon, life cyc…	N/A	N/A	45 years	Negative	1. Extending harvest rotations beyond period of fast growth reduces volume and value of sustainably produced resources (that can be used to store carbon and displace fossil fuels) and reduces absorption of carbon from the atmosphere	100 years	Thinning tree <30cm diameter; rapid implementation of treatments and a 400% increase in the amount of area treated	N/A	1. End of life products incinerated without energy recovery, recycling, or landfill (conservative) Figure 12	1. Equal soil carbon 2. Equal rates of decomposotion of dead material	150 metric tons C per ha (total carbon stores)	N/A	N/A	1. Emissions from burning biomass for energy and the products produced from forest removals are being offset by the sustained growth in forest carbon removed from the atmosphere even after deducting any emissions from unused dead wood left in the forest 2. Increase use of renewable fuels	1. The energy required & emissions produced to collect biomass currently left in the forest is low; European experience shows that fossil fuel energy inputs for recovering and transporting harvest residues are approximately 3–5% of the available energy in the recovered biomass; It is the comparatively low cost of fossil fuels that limits the collection of forest residuals or other wood wastes tha…	1. We note that carbon mitigation impacts on ecosystem services affecting their non-market values can be significant; tradeoffs between ecosystem metrics (ecosystem service protection) and carbon mitigation are more critical for unmanaged than sustainably managed commercial forests; Consequences on non-market ecosystem performance (i.e. habitat) pg. 321-322; it is less costly to manage lands to p…	1. Store carbon in the forest, knowing that ultimately, the rate that carbon is removed from the atmosphere through net new growth will slow down, and in the event of a disturbance may emit more carbon than if harvested	1. Sustainably managed forests provide the opportunity to sustain a maximum rate of carbon absorption; the dominant source of carbon mitigation comes from sustainably displacing fossil emissions through the use of wood since the carbon stored in the forest is a one-time creation and can only contribute to sustainably reducing carbon emissions by harvesting the wood to substitute for other materia…	1. Urea fertilization: Yanai et al. also suggest that SOC may actually be increased with appropriate management inputs for example, an application of urea fertilization as part of the management regime has been shown to increase both forest productivity and soil carbon accumulation for some soils; Adams et al. found urea fertilization increased site productivity resulting in increases in both abo…	N/A
9	Lippke	Life cycle impacts of forest management and wood utilization on carbon mitigation: knowns and unknowns	2011	Life cycle carbon accounting	1. This review on research on life cycle carbon accounting examines the complexities in accounting for carbon emissions given the many different ways that wood is used. 2. The objective of this review is to show the extent to which recent research findings on life cycle carbon accounting across all stages of processing, from cradle-to-grave, can identify opportunities for carbon mitigation improv…	Sustainable Industrial	1.Impact of end-of-life strategies for products and buildings 2.Landfill emissions and methane capture from landfills 3. Soil carbon changes 4. Unmanaged forests, particularly the increasing rates of fire and consequent impact on both forest and product-carbon pools	Washington, PNW	Unsure	Yes	Consequential	roots, stem, crown, litter, dead	1. Forest soil carbon excluded assuming no change between rotations; roots, stem, crown, litter carbon pools included; Literature analyzes limited set of carbon pools with unintended consequences for un-analyzed pools; Carbon exchanges, regulations and incentives differ across countries but frequently reward one or more carbon pools independently resulting in counterproductive impacts on carbon e…	N/A	1. Reducing fire risks in unmanaged forests by thinning, while also producing biofuels and carbon stored in wood products, which also avoids many costs incurred in fighting fires and rehabilitating the land; Thinning treatments can restore forest health and double carbon stores; Increased wildfire expected due to climate change 2. Rate of fire on unmanaged lands much higher than on managed lands …	Mention of habitat preservation; Consequences on non-market ecosystem performance (i.e. habitat) pg. 321-322; increased intensity on currently managed lands has little impact but harvest on unmanaged old forest does	N/A	N/A	N/A	Fire	N/A	N/A	N/A	1. The US LCI mill survey data shows that approximately 50–70% of the aboveground biomass in a sustainably managed forest is currently utilized in product processing mills to make solid wood products along with paper and biofuel co-products. The remaining 30–50% (e.g., crown, litter and dead/breakage) is currently left to decay along with the roots to augment soil processes, be burnt, or provide …	Not used	1. Sustainably harvesting wood from the forest before growth slows down and storing the carbon in wood products while offsetting fossil fuel consumption; The goal of reducing GHGs suggests displacing the one-way flow of GHGs from fossil fuel-intensive products with forest products and biofuels from carbon-neutral forests; While afforestation provides a one-time increase in forest carbon, life cyc…	N/A	N/A	N/A	Negative	1. Extending harvest rotations beyond period of fast growth reduces volume and value of sustainably produced resources (that can be used to store carbon and displace fossil fuels) and reduces absorption of carbon from the atmosphere	100 years	N/A	Wildfire	1. End of life products incinerated without energy recovery, recycling, or landfill (conservative) Figure 13	1. Equal soil carbon 2. Equal rates of decomposotion of dead material	75 metric tons C per ha (total carbon stores)	N/A	N/A	1. Emissions from burning biomass for energy and the products produced from forest removals are being offset by the sustained growth in forest carbon removed from the atmosphere even after deducting any emissions from unused dead wood left in the forest 2. Increase use of renewable fuels	1. The energy required & emissions produced to collect biomass currently left in the forest is low; European experience shows that fossil fuel energy inputs for recovering and transporting harvest residues are approximately 3–5% of the available energy in the recovered biomass; It is the comparatively low cost of fossil fuels that limits the collection of forest residuals or other wood wastes tha…	1. We note that carbon mitigation impacts on ecosystem services affecting their non-market values can be significant; tradeoffs between ecosystem metrics (ecosystem service protection) and carbon mitigation are more critical for unmanaged than sustainably managed commercial forests; Consequences on non-market ecosystem performance (i.e. habitat) pg. 321-322; it is less costly to manage lands to p…	1. Store carbon in the forest, knowing that ultimately, the rate that carbon is removed from the atmosphere through net new growth will slow down, and in the event of a disturbance may emit more carbon than if harvested	1. Sustainably managed forests provide the opportunity to sustain a maximum rate of carbon absorption; the dominant source of carbon mitigation comes from sustainably displacing fossil emissions through the use of wood since the carbon stored in the forest is a one-time creation and can only contribute to sustainably reducing carbon emissions by harvesting the wood to substitute for other materia…	1. Urea fertilization: Yanai et al. also suggest that SOC may actually be increased with appropriate management inputs for example, an application of urea fertilization as part of the management regime has been shown to increase both forest productivity and soil carbon accumulation for some soils; Adams et al. found urea fertilization increased site productivity resulting in increases in both abo…	N/A
9	Malmsheimer	Managing Forests because Carbon Matters: Integrating Energy, Products, and Land Management Policy	2011	Life cycle carbon accounting	N/A	Sustainable Industrial	N/A	United States	N/A	No	N/A	includes soil	N/A	N/A	1. Low-severity wildfires and prescribed fires have little effect on soil carbon and may even increase mineral soil carbon through deposition and mixing of partially burned or residual organic matter into the surface mineral soil (Johnson and Curtis 2001, Hatten et al. 2005, 2008). Conversely, high-severity wildfire decreases soil carbon stocks by 10–60% (Baird et al. 1999, Bormann et al. 2008, H…	Mentioned	Mentioned; Weather-Related Disturbances	Mentioned; Insects and Disease	N/A	N/A	1. In total, the rate of carbon accumulation from wood products in use and in landfills was about 88 million tonnes of carbon dioxide equivalents (CO2e) in 2008, about 12% of the rate of sequestration in forests. 2. Saw- logs can be used to create long-lasting wood products but account for only about one- half of the wood products used by consumers. 3. About one-third of harvested vol- ume goes i…	80 years	1. Based on census data, the half-life of the US housing stock is approximately 80 years	1. In the United States in 2008, renewable energy produced from tree bark, sawdust, manufacturing and har- vest residuals, and byproducts of pulping in papermaking processes provided 65% of the energy used in manufacturing paper prod- ucts and more than 73% of the energy used in manufacturing wood products (American Forest and Paper Association 2010).	Yes	1. Forest products used in place of energy- intensive materials such as metals, con- crete and plastics (a) reduce carbon emis- sions (because forest products require less fossil fuel-based energy to produce), (b) store carbon (for a length of time based on products’ use and disposal), and (c) provide biomass residuals (i.e., waste wood) that can be substituted for fossil fuels to produce energy …	1. and. Since 1980, domestic production of roundwood has fluctuated around 300 mil- lion m3 of wood products while consump- tion has increased by more than 20% (Fig- ure 2-1). Most of this gap has been filled with imports from Canada and other coun- tries. Because harvesting in Canada had to increase to fill this gap, Canadian forest car- bon stocks are lower than they would have been otherwise. …	1. Forest fertilization may increase or decrease soil carbon stores by increasing net primary production (?), shifting production to aboveground vegetation components (?), increasing soil carbon mineralization (?), and depressing some enzyme activity (?) (Jandl et al. 2007, Van Miegroet and Jandl 2007).	N/A	N/A	N/A	N/A	N/A	1. In most of the American West, fire and insects pose a very immediate threat of catastrophic loss of live tree carbon, turning affected forests into car- bon emitters. In the rest of the United States, insect, disease, and storm-related conversion of live carbon to dead carbon eventually slows, stops, and sometimes re- verses net sequestration.	1. If they are landfilled, the carbon contained within them can be stored for a long period of time, but there can also be a substantial GHG cost because of methane emissions, particularly from paper decomposition. This sug- gests that incentives should be high to reuse paper and wood, recycle it, or burn it to re- cover at least its heating value. 2. The collection efficiencies of landfilling ha…		1. The annual rate of carbon accumulation within wood products in use and in landfills was estimated at about 28–29 million tonnes—14.8% of the rate of sequestration within forests (US forests during 2005–2007; (US EPA 2010)); In total, the rate of carbon accumulation from wood products in use and in landfills was about 88 million tonnes of carbon dioxide equivalents (CO2e) in 2008, about 12% of …	N/A	N/A	1. Expanding forest biomass use for biofuels and energy generation will compete with traditional forest products, but it may also produce benefits through competition and market efficiency. Short-rotation woody crops, as well as landowners’ preferences—based on investment-return expectations and environmental considerations, both of which will be affected by energy and environmental policies—have…	N/A	N/A	1. Unmanaged forests do not provide additional climate benefits indefinitely. The age when annual forest carbon storage incre- ments begin to decline varies but generally occurs in the first 100–150 years as tree mortality losses increase. 2. For example, 85% of the woody biomass–based carbon storage in ponderosa pine forests in central Oregon is in stands older than 100 years where annual accumu…	1. Growing more forests and keeping forests as forests are only part of the solution, because focusing solely on the sequestration benefits of the forests misses the important (and substantial) carbon storage and substitution GHG benefits of harvested forest products, as well as other benefits of active forest management 2. US policymakers should take to heart the finding of the Intergovernmental…	N/A	N/A
9	Nunery	Forest carbon storage in the northeastern United States: Net effects of harvesting frequency, post-harvest retention, and wood products	2010	Harvest carbon store modeling	1. This study uses a widely accepted forest growth model to examine C sequestration tradeoffs among harvesting frequency and post-harvest structural retention under even- and uneven- aged forest management, while incorporating fluxes to wood products. We address a fundamental research question facing forest managers, namely: what is the most effective way to store C through forest management? Is …	No Management	1. The potential for CO2 fertilization effects on plant growth is also major source of uncertainty	Northeast US; encompassing portions of upstate New York, Vermont,NewHampshire, and Maine	N/A	No	N/A	aboveground C + wood products	1. carbon flux between aboveground forest biomass (dead and live pools) and harvested wood products 2. In this study we are particularly interested in aboveground C storage, and thus use the term‘‘sequestration’’ to refer to total C stocks (aboveground forest biomass +wood products), rather than uptake rates 3. Slash was not included in the aboveground dead wood carbon calculations when removed f…	N/A	N/A	N/A	N/A	N/A	No Management	No Management	N/A	N/A	N/A	N/A	Not used	1. In order to isolate the effect of in situ forest carbon storage and harvested wood products, we did not include the emissions benefits associated with substituting wood fiber for other construction materials or energy sources.	N/A	N/A	N/A	Positive	N/A	160 years	N/A	Discussed in Discussion section	N/A	1. To evaluate the effect of structural retention, we developed two different even-aged management scenarios representing different levels of structural retention. A clearcut represented low structural retention and the most intensive management practice, with a complete removal of all trees greater than 5 cmdiameter at breast height (DBH). A shelterwood (Nyland, 1996) represented greater structu…	157 +/- 9; Value (mean +/- 95% CI) - Mean C storage over the 160 year simulation period for several different pools (n=32): Total C with wood products (MgC/ha)	N/A	N/A	N/A	N/A	N/A	N/A	1. Our findings suggest that passive or less intensive management are the most effective management techniques for achieving addi- tionality, assuming no inclusion of substitution effects and market mechanisms to minimize displacement of timber harvesting to other properties or regions. We showed that even with consider- ation of C sequestered in harvested wood products, unmanaged northern hardwo…	N/A	N/A
9	Nunery	Forest carbon storage in the northeastern United States: Net effects of harvesting frequency, post-harvest retention, and wood products	2010	Harvest carbon store modeling	1. This study uses a widely accepted forest growth model to examine C sequestration tradeoffs among harvesting frequency and post-harvest structural retention under even- and uneven- aged forest management, while incorporating fluxes to wood products. We address a fundamental research question facing forest managers, namely: what is the most effective way to store C through forest management? Is …	No Management	1. The potential for CO2 fertilization effects on plant growth is also major source of uncertainty	Northeast US; encompassing portions of upstate New York, Vermont,NewHampshire, and Maine	N/A	No	N/A	aboveground C + wood products	1. carbon flux between aboveground forest biomass (dead and live pools) and harvested wood products 2. In this study we are particularly interested in aboveground C storage, and thus use the term‘‘sequestration’’ to refer to total C stocks (aboveground forest biomass +wood products), rather than uptake rates 3. Slash was not included in the aboveground dead wood carbon calculations when removed f…	N/A	N/A	N/A	N/A	N/A	No Management	ITS_HighLow ITS = uneven aged stands High = 12 legacy trees remaining, larger residual basal area Low = harvest frequency of 30 years	N/A	N/A	N/A	N/A	Not used	1. In order to isolate the effect of in situ forest carbon storage and harvested wood products, we did not include the emissions benefits associated with substituting wood fiber for other construction materials or energy sources.	N/A	N/A	N/A	Positive	N/A	160 years	N/A	Discussed in Discussion section	N/A	1. To evaluate the effect of structural retention, we developed two different even-aged management scenarios representing different levels of structural retention. A clearcut represented low structural retention and the most intensive management practice, with a complete removal of all trees greater than 5 cmdiameter at breast height (DBH). A shelterwood (Nyland, 1996) represented greater structu…	113 +/- 5; Value (mean +/- 95% CI) - Mean C storage over the 160 year simulation period for several different pools (n=32): Total C with wood products (MgC/ha)	N/A	N/A	N/A	N/A	N/A	N/A	1. Our findings suggest that passive or less intensive management are the most effective management techniques for achieving addi- tionality, assuming no inclusion of substitution effects and market mechanisms to minimize displacement of timber harvesting to other properties or regions. We showed that even with consider- ation of C sequestered in harvested wood products, unmanaged northern hardwo…	N/A	N/A
10	Nunery	Forest carbon storage in the northeastern United States: Net effects of harvesting frequency, post-harvest retention, and wood products	2010	Harvest carbon store modeling	1. This study uses a widely accepted forest growth model to examine C sequestration tradeoffs among harvesting frequency and post-harvest structural retention under even- and uneven- aged forest management, while incorporating fluxes to wood products. We address a fundamental research question facing forest managers, namely: what is the most effective way to store C through forest management? Is …	No Management	1. The potential for CO2 fertilization effects on plant growth is also major source of uncertainty	Northeast US; encompassing portions of upstate New York, Vermont,NewHampshire, and Maine	N/A	No	N/A	aboveground C + wood products	1. carbon flux between aboveground forest biomass (dead and live pools) and harvested wood products 2. In this study we are particularly interested in aboveground C storage, and thus use the term‘‘sequestration’’ to refer to total C stocks (aboveground forest biomass +wood products), rather than uptake rates 3. Slash was not included in the aboveground dead wood carbon calculations when removed f…	N/A	N/A	N/A	N/A	N/A	No Management	ITS_HighHigh ITS = uneven aged stands 1st High = 12 legacy trees remaining, larger residual basal area 2nd High = harvest frequency of 15 years	N/A	N/A	N/A	N/A	Not used	1. In order to isolate the effect of in situ forest carbon storage and harvested wood products, we did not include the emissions benefits associated with substituting wood fiber for other construction materials or energy sources.	N/A	N/A	N/A	Positive	N/A	160 years	N/A	Discussed in Discussion section	N/A	1. To evaluate the effect of structural retention, we developed two different even-aged management scenarios representing different levels of structural retention. A clearcut represented low structural retention and the most intensive management practice, with a complete removal of all trees greater than 5 cmdiameter at breast height (DBH). A shelterwood (Nyland, 1996) represented greater structu…	107 +/- 5; Value (mean +/- 95% CI) - Mean C storage over the 160 year simulation period for several different pools (n=32): Total C with wood products (MgC/ha)	N/A	N/A	N/A	N/A	N/A	N/A	1. Our findings suggest that passive or less intensive management are the most effective management techniques for achieving addi- tionality, assuming no inclusion of substitution effects and market mechanisms to minimize displacement of timber harvesting to other properties or regions. We showed that even with consider- ation of C sequestered in harvested wood products, unmanaged northern hardwo…	N/A	N/A
11	Nunery	Forest carbon storage in the northeastern United States: Net effects of harvesting frequency, post-harvest retention, and wood products	2010	Harvest carbon store modeling	1. This study uses a widely accepted forest growth model to examine C sequestration tradeoffs among harvesting frequency and post-harvest structural retention under even- and uneven- aged forest management, while incorporating fluxes to wood products. We address a fundamental research question facing forest managers, namely: what is the most effective way to store C through forest management? Is …	No Management	1. The potential for CO2 fertilization effects on plant growth is also major source of uncertainty	Northeast US; encompassing portions of upstate New York, Vermont,NewHampshire, and Maine	N/A	No	N/A	aboveground C + wood products	1. carbon flux between aboveground forest biomass (dead and live pools) and harvested wood products 2. In this study we are particularly interested in aboveground C storage, and thus use the term‘‘sequestration’’ to refer to total C stocks (aboveground forest biomass +wood products), rather than uptake rates 3. Slash was not included in the aboveground dead wood carbon calculations when removed f…	N/A	N/A	N/A	N/A	N/A	No Management	ITS_LowLow ITS = uneven aged stands 1st Low = no legacy trees remaining, smaller residual basal area 2nd Low = harvest frequency of 30 years	N/A	N/A	N/A	N/A	Not used	1. In order to isolate the effect of in situ forest carbon storage and harvested wood products, we did not include the emissions benefits associated with substituting wood fiber for other construction materials or energy sources.	N/A	N/A	N/A	Positive	N/A	160 years	N/A	Discussed in Discussion section	N/A	1. To evaluate the effect of structural retention, we developed two different even-aged management scenarios representing different levels of structural retention. A clearcut represented low structural retention and the most intensive management practice, with a complete removal of all trees greater than 5 cmdiameter at breast height (DBH). A shelterwood (Nyland, 1996) represented greater structu…	98 +/- 5; Value (mean +/- 95% CI) - Mean C storage over the 160 year simulation period for several different pools (n=32): Total C with wood products (MgC/ha)	N/A	N/A	N/A	N/A	N/A	N/A	1. Our findings suggest that passive or less intensive management are the most effective management techniques for achieving addi- tionality, assuming no inclusion of substitution effects and market mechanisms to minimize displacement of timber harvesting to other properties or regions. We showed that even with consider- ation of C sequestered in harvested wood products, unmanaged northern hardwo…	N/A	N/A
11	Nunery	Forest carbon storage in the northeastern United States: Net effects of harvesting frequency, post-harvest retention, and wood products	2010	Harvest carbon store modeling	1. This study uses a widely accepted forest growth model to examine C sequestration tradeoffs among harvesting frequency and post-harvest structural retention under even- and uneven- aged forest management, while incorporating fluxes to wood products. We address a fundamental research question facing forest managers, namely: what is the most effective way to store C through forest management? Is …	No Management	1. The potential for CO2 fertilization effects on plant growth is also major source of uncertainty	Northeast US; encompassing portions of upstate New York, Vermont,NewHampshire, and Maine	N/A	No	N/A	aboveground C + wood products	1. carbon flux between aboveground forest biomass (dead and live pools) and harvested wood products 2. In this study we are particularly interested in aboveground C storage, and thus use the term‘‘sequestration’’ to refer to total C stocks (aboveground forest biomass +wood products), rather than uptake rates 3. Slash was not included in the aboveground dead wood carbon calculations when removed f…	N/A	N/A	N/A	N/A	N/A	No Management	ITS_LowHigh ITS = uneven aged stands Low = no legacy trees remaining, smaller residual basal area High = harvest frequency of 15 years	N/A	N/A	N/A	N/A	Not used	1. In order to isolate the effect of in situ forest carbon storage and harvested wood products, we did not include the emissions benefits associated with substituting wood fiber for other construction materials or energy sources.	N/A	N/A	N/A	Positive	N/A	160 years	N/A	Discussed in Discussion section	N/A	1. To evaluate the effect of structural retention, we developed two different even-aged management scenarios representing different levels of structural retention. A clearcut represented low structural retention and the most intensive management practice, with a complete removal of all trees greater than 5 cmdiameter at breast height (DBH). A shelterwood (Nyland, 1996) represented greater structu…	91 +/- 4; Value (mean +/- 95% CI) - Mean C storage over the 160 year simulation period for several different pools (n=32): Total C with wood products (MgC/ha)	N/A	N/A	N/A	N/A	N/A	N/A	1. Our findings suggest that passive or less intensive management are the most effective management techniques for achieving addi- tionality, assuming no inclusion of substitution effects and market mechanisms to minimize displacement of timber harvesting to other properties or regions. We showed that even with consider- ation of C sequestered in harvested wood products, unmanaged northern hardwo…	N/A	N/A
11	Nunery	Forest carbon storage in the northeastern United States: Net effects of harvesting frequency, post-harvest retention, and wood products	2010	Harvest carbon store modeling	1. This study uses a widely accepted forest growth model to examine C sequestration tradeoffs among harvesting frequency and post-harvest structural retention under even- and uneven- aged forest management, while incorporating fluxes to wood products. We address a fundamental research question facing forest managers, namely: what is the most effective way to store C through forest management? Is …	No Management	1. The potential for CO2 fertilization effects on plant growth is also major source of uncertainty	Northeast US; encompassing portions of upstate New York, Vermont,NewHampshire, and Maine	N/A	No	N/A	aboveground C + wood products	1. carbon flux between aboveground forest biomass (dead and live pools) and harvested wood products 2. In this study we are particularly interested in aboveground C storage, and thus use the term‘‘sequestration’’ to refer to total C stocks (aboveground forest biomass +wood products), rather than uptake rates 3. Slash was not included in the aboveground dead wood carbon calculations when removed f…	N/A	N/A	N/A	N/A	N/A	No Management	Shelterwood_Low Shelterwood = structural retention indicator; a shelterwood (Nyland, 1996) represented greater (high) structural retention, with the retention of six legacy trees (canopy trees never harvested) Even-aged stands Low = harvesting frequency is 120 years	N/A	N/A	N/A	N/A	Not used	1. In order to isolate the effect of in situ forest carbon storage and harvested wood products, we did not include the emissions benefits associated with substituting wood fiber for other construction materials or energy sources.	N/A	N/A	N/A	Positive	N/A	160 years	N/A	Discussed in Discussion section	N/A	1. To evaluate the effect of structural retention, we developed two different even-aged management scenarios representing different levels of structural retention. A clearcut represented low structural retention and the most intensive management practice, with a complete removal of all trees greater than 5 cmdiameter at breast height (DBH). A shelterwood (Nyland, 1996) represented greater structu…	90 +/- 5; Value (mean +/- 95% CI) - Mean C storage over the 160 year simulation period for several different pools (n=32): Total C with wood products (MgC/ha)	N/A	N/A	N/A	N/A	N/A	N/A	1. Our findings suggest that passive or less intensive management are the most effective management techniques for achieving addi- tionality, assuming no inclusion of substitution effects and market mechanisms to minimize displacement of timber harvesting to other properties or regions. We showed that even with consider- ation of C sequestered in harvested wood products, unmanaged northern hardwo…	N/A	N/A
11	Nunery	Forest carbon storage in the northeastern United States: Net effects of harvesting frequency, post-harvest retention, and wood products	2010	Harvest carbon store modeling	1. This study uses a widely accepted forest growth model to examine C sequestration tradeoffs among harvesting frequency and post-harvest structural retention under even- and uneven- aged forest management, while incorporating fluxes to wood products. We address a fundamental research question facing forest managers, namely: what is the most effective way to store C through forest management? Is …	No Management	1. The potential for CO2 fertilization effects on plant growth is also major source of uncertainty	Northeast US; encompassing portions of upstate New York, Vermont,NewHampshire, and Maine	N/A	No	N/A	aboveground C + wood products	1. carbon flux between aboveground forest biomass (dead and live pools) and harvested wood products 2. In this study we are particularly interested in aboveground C storage, and thus use the term‘‘sequestration’’ to refer to total C stocks (aboveground forest biomass +wood products), rather than uptake rates 3. Slash was not included in the aboveground dead wood carbon calculations when removed f…	N/A	N/A	N/A	N/A	N/A	No Management	Shelterwood_High Shelterwood = structural retention indicator; a shelterwood (Nyland, 1996) represented greater (high) structural retention, with the retention of six legacy trees (canopy trees never harvested) Even-aged stands High = harvesting frequency is 80 years	N/A	N/A	N/A	N/A	Not used	1. In order to isolate the effect of in situ forest carbon storage and harvested wood products, we did not include the emissions benefits associated with substituting wood fiber for other construction materials or energy sources.	N/A	N/A	N/A	Positive	N/A	160 years	N/A	Discussed in Discussion section	N/A	1. To evaluate the effect of structural retention, we developed two different even-aged management scenarios representing different levels of structural retention. A clearcut represented low structural retention and the most intensive management practice, with a complete removal of all trees greater than 5 cmdiameter at breast height (DBH). A shelterwood (Nyland, 1996) represented greater structu…	90 +/- 5; Value (mean +/- 95% CI) - Mean C storage over the 160 year simulation period for several different pools (n=32): Total C with wood products (MgC/ha)	N/A	N/A	N/A	N/A	N/A	N/A	1. Our findings suggest that passive or less intensive management are the most effective management techniques for achieving addi- tionality, assuming no inclusion of substitution effects and market mechanisms to minimize displacement of timber harvesting to other properties or regions. We showed that even with consider- ation of C sequestered in harvested wood products, unmanaged northern hardwo…	N/A	N/A
11	Nunery	Forest carbon storage in the northeastern United States: Net effects of harvesting frequency, post-harvest retention, and wood products	2010	Harvest carbon store modeling	1. This study uses a widely accepted forest growth model to examine C sequestration tradeoffs among harvesting frequency and post-harvest structural retention under even- and uneven- aged forest management, while incorporating fluxes to wood products. We address a fundamental research question facing forest managers, namely: what is the most effective way to store C through forest management? Is …	No Management	1. The potential for CO2 fertilization effects on plant growth is also major source of uncertainty	Northeast US; encompassing portions of upstate New York, Vermont,NewHampshire, and Maine	N/A	No	N/A	aboveground C + wood products	1. carbon flux between aboveground forest biomass (dead and live pools) and harvested wood products 2. In this study we are particularly interested in aboveground C storage, and thus use the term‘‘sequestration’’ to refer to total C stocks (aboveground forest biomass +wood products), rather than uptake rates 3. Slash was not included in the aboveground dead wood carbon calculations when removed f…	N/A	N/A	N/A	N/A	N/A	No Management	Clearcut_Low Clearcut = structural retention indicator; a clearcut represented low structural retention and the most intensive management practice Even-aged stands Low = harvesting frequency is 120 years	N/A	N/A	N/A	N/A	Not used	1. In order to isolate the effect of in situ forest carbon storage and harvested wood products, we did not include the emissions benefits associated with substituting wood fiber for other construction materials or energy sources.	N/A	N/A	N/A	Positive	N/A	160 years	N/A	Discussed in Discussion section	N/A	1. To evaluate the effect of structural retention, we developed two different even-aged management scenarios representing different levels of structural retention. A clearcut represented low structural retention and the most intensive management practice, with a complete removal of all trees greater than 5 cmdiameter at breast height (DBH). A shelterwood (Nyland, 1996) represented greater structu…	74 +/- 5; Value (mean +/- 95% CI) - Mean C storage over the 160 year simulation period for several different pools (n=32): Total C with wood products (MgC/ha)	N/A	N/A	N/A	N/A	N/A	N/A	1. Our findings suggest that passive or less intensive management are the most effective management techniques for achieving addi- tionality, assuming no inclusion of substitution effects and market mechanisms to minimize displacement of timber harvesting to other properties or regions. We showed that even with consider- ation of C sequestered in harvested wood products, unmanaged northern hardwo…	N/A	N/A
11	Nunery	Forest carbon storage in the northeastern United States: Net effects of harvesting frequency, post-harvest retention, and wood products	2010	Harvest carbon store modeling	1. This study uses a widely accepted forest growth model to examine C sequestration tradeoffs among harvesting frequency and post-harvest structural retention under even- and uneven- aged forest management, while incorporating fluxes to wood products. We address a fundamental research question facing forest managers, namely: what is the most effective way to store C through forest management? Is …	No Management	1. The potential for CO2 fertilization effects on plant growth is also major source of uncertainty	Northeast US; encompassing portions of upstate New York, Vermont,NewHampshire, and Maine	N/A	No	N/A	aboveground C + wood products	1. carbon flux between aboveground forest biomass (dead and live pools) and harvested wood products 2. In this study we are particularly interested in aboveground C storage, and thus use the term‘‘sequestration’’ to refer to total C stocks (aboveground forest biomass +wood products), rather than uptake rates 3. Slash was not included in the aboveground dead wood carbon calculations when removed f…	N/A	N/A	N/A	N/A	N/A	No Management	Clearcut_High Clearcut = structural retention indicator; a clearcut represented low structural retention and the most intensive management practice Even-aged stands High = harvesting frequency is 80 years	N/A	N/A	N/A	N/A	Not used	1. In order to isolate the effect of in situ forest carbon storage and harvested wood products, we did not include the emissions benefits associated with substituting wood fiber for other construction materials or energy sources.	N/A	N/A	N/A	Positive	N/A	160 years	N/A	Discussed in Discussion section	N/A	1. To evaluate the effect of structural retention, we developed two different even-aged management scenarios representing different levels of structural retention. A clearcut represented low structural retention and the most intensive management practice, with a complete removal of all trees greater than 5 cmdiameter at breast height (DBH). A shelterwood (Nyland, 1996) represented greater structu…	72 +/- 5; Value (mean +/- 95% CI) - Mean C storage over the 160 year simulation period for several different pools (n=32): Total C with wood products (MgC/ha)	N/A	N/A	N/A	N/A	N/A	N/A	1. Our findings suggest that passive or less intensive management are the most effective management techniques for achieving addi- tionality, assuming no inclusion of substitution effects and market mechanisms to minimize displacement of timber harvesting to other properties or regions. We showed that even with consider- ation of C sequestered in harvested wood products, unmanaged northern hardwo…	N/A	N/A
11	Nunery	Forest carbon storage in the northeastern United States: Net effects of harvesting frequency, post-harvest retention, and wood products	2010	Harvest carbon store modeling	1. This study uses a widely accepted forest growth model to examine C sequestration tradeoffs among harvesting frequency and post-harvest structural retention under even- and uneven- aged forest management, while incorporating fluxes to wood products. We address a fundamental research question facing forest managers, namely: what is the most effective way to store C through forest management? Is …	No Management	1. The potential for CO2 fertilization effects on plant growth is also major source of uncertainty	Northeast US; encompassing portions of upstate New York, Vermont,NewHampshire, and Maine	N/A	No	N/A	aboveground C + wood products	1. carbon flux between aboveground forest biomass (dead and live pools) and harvested wood products 2. In this study we are particularly interested in aboveground C storage, and thus use the term‘‘sequestration’’ to refer to total C stocks (aboveground forest biomass +wood products), rather than uptake rates 3. Slash was not included in the aboveground dead wood carbon calculations when removed f…	N/A	N/A	N/A	N/A	N/A	No Management	Clearcut_High_U2 Forest with/without harvested wood products C uptake rate for 160 year simulation period (MgC/ha/yr) Clearcut = structural retention indicator; a clearcut represented low structural retention and the most intensive management practice Even-aged stands High = harvesting frequency is 80 years	N/A	N/A	N/A	N/A	Not used	1. In order to isolate the effect of in situ forest carbon storage and harvested wood products, we did not include the emissions benefits associated with substituting wood fiber for other construction materials or energy sources.	N/A	N/A	N/A	Positive	N/A	160 years	N/A	Discussed in Discussion section	N/A	1. To clarify the relative importance of uptake rates versus storage in our estimates of total predicted sequestration, we calculated average annual C uptake rates three different ways (Table 9): (1) C uptake rate per harvest cycle with the inclusion of wood products (U1); (2) C uptake rate for 160 simulation period without the inclusion of C stored in wood products (U2); and (3) C uptake rate fo…	0.23 - U2 Forest C uptake rate for 160 year simulation period (MgC/ha/yr) 0.23 - U3 Forest and harvested wood products C uptake rate for 160 year simulation period (MgC/ha/yr)	N/A	N/A	N/A	N/A	N/A	N/A	1. Our findings suggest that passive or less intensive management are the most effective management techniques for achieving addi- tionality, assuming no inclusion of substitution effects and market mechanisms to minimize displacement of timber harvesting to other properties or regions. We showed that even with consider- ation of C sequestered in harvested wood products, unmanaged northern hardwo…	N/A	N/A
11	Nunery	Forest carbon storage in the northeastern United States: Net effects of harvesting frequency, post-harvest retention, and wood products	2010	Harvest carbon store modeling	1. This study uses a widely accepted forest growth model to examine C sequestration tradeoffs among harvesting frequency and post-harvest structural retention under even- and uneven- aged forest management, while incorporating fluxes to wood products. We address a fundamental research question facing forest managers, namely: what is the most effective way to store C through forest management? Is …	No Management	1. The potential for CO2 fertilization effects on plant growth is also major source of uncertainty	Northeast US; encompassing portions of upstate New York, Vermont,NewHampshire, and Maine	N/A	No	N/A	aboveground C + wood products	1. carbon flux between aboveground forest biomass (dead and live pools) and harvested wood products 2. In this study we are particularly interested in aboveground C storage, and thus use the term‘‘sequestration’’ to refer to total C stocks (aboveground forest biomass +wood products), rather than uptake rates 3. Slash was not included in the aboveground dead wood carbon calculations when removed f…	N/A	N/A	N/A	N/A	N/A	No Management	Clearcut_Low_U2 Forest with/without harvested wood products C uptake rate for 160 year simulation period (MgC/ha/yr) Clearcut = structural retention indicator; a clearcut represented low structural retention and the most intensive management practice Even-aged stands Low = harvesting frequency is 120 years	N/A	N/A	N/A	N/A	Not used	1. In order to isolate the effect of in situ forest carbon storage and harvested wood products, we did not include the emissions benefits associated with substituting wood fiber for other construction materials or energy sources.	N/A	N/A	N/A	Positive	N/A	160 years	N/A	Discussed in Discussion section	N/A	1. To clarify the relative importance of uptake rates versus storage in our estimates of total predicted sequestration, we calculated average annual C uptake rates three different ways (Table 9): (1) C uptake rate per harvest cycle with the inclusion of wood products (U1); (2) C uptake rate for 160 simulation period without the inclusion of C stored in wood products (U2); and (3) C uptake rate fo…	0.02 - U2 Forest C uptake rate for 160 year simulation period (MgC/ha/yr) 0.08 - U3 Forest and harvested wood products C uptake rate for 160 year simulation period (MgC/ha/yr)	N/A	N/A	N/A	N/A	N/A	N/A	1. Our findings suggest that passive or less intensive management are the most effective management techniques for achieving addi- tionality, assuming no inclusion of substitution effects and market mechanisms to minimize displacement of timber harvesting to other properties or regions. We showed that even with consider- ation of C sequestered in harvested wood products, unmanaged northern hardwo…	N/A	N/A
11	Nunery	Forest carbon storage in the northeastern United States: Net effects of harvesting frequency, post-harvest retention, and wood products	2010	Harvest carbon store modeling	1. This study uses a widely accepted forest growth model to examine C sequestration tradeoffs among harvesting frequency and post-harvest structural retention under even- and uneven- aged forest management, while incorporating fluxes to wood products. We address a fundamental research question facing forest managers, namely: what is the most effective way to store C through forest management? Is …	No Management	1. The potential for CO2 fertilization effects on plant growth is also major source of uncertainty	Northeast US; encompassing portions of upstate New York, Vermont,NewHampshire, and Maine	N/A	No	N/A	aboveground C + wood products	1. carbon flux between aboveground forest biomass (dead and live pools) and harvested wood products 2. In this study we are particularly interested in aboveground C storage, and thus use the term‘‘sequestration’’ to refer to total C stocks (aboveground forest biomass +wood products), rather than uptake rates 3. Slash was not included in the aboveground dead wood carbon calculations when removed f…	N/A	N/A	N/A	N/A	N/A	No Management	Shelterwood_High_U2 Forest with/without harvested wood products C uptake rate for 160 year simulation period (MgC/ha/yr) Shelterwood = structural retention indicator; a shelterwood (Nyland, 1996) represented greater (high) structural retention, with the retention of six legacy trees (canopy trees never harvested) Even-aged stands High = harvesting frequency 80 years	N/A	N/A	N/A	N/A	Not used	1. In order to isolate the effect of in situ forest carbon storage and harvested wood products, we did not include the emissions benefits associated with substituting wood fiber for other construction materials or energy sources.	N/A	N/A	N/A	Positive	N/A	160 years	N/A	Discussed in Discussion section	N/A	1. To clarify the relative importance of uptake rates versus storage in our estimates of total predicted sequestration, we calculated average annual C uptake rates three different ways (Table 9): (1) C uptake rate per harvest cycle with the inclusion of wood products (U1); (2) C uptake rate for 160 simulation period without the inclusion of C stored in wood products (U2); and (3) C uptake rate fo…	0.13 - U2 Forest C uptake rate for 160 year simulation period (MgC/ha/yr) 0.13 - U3 Forest and harvested wood products C uptake rate for 160 year simulation period (MgC/ha/yr)	N/A	N/A	N/A	N/A	N/A	N/A	1. Our findings suggest that passive or less intensive management are the most effective management techniques for achieving addi- tionality, assuming no inclusion of substitution effects and market mechanisms to minimize displacement of timber harvesting to other properties or regions. We showed that even with consider- ation of C sequestered in harvested wood products, unmanaged northern hardwo…	N/A	N/A
11	Nunery	Forest carbon storage in the northeastern United States: Net effects of harvesting frequency, post-harvest retention, and wood products	2010	Harvest carbon store modeling	1. This study uses a widely accepted forest growth model to examine C sequestration tradeoffs among harvesting frequency and post-harvest structural retention under even- and uneven- aged forest management, while incorporating fluxes to wood products. We address a fundamental research question facing forest managers, namely: what is the most effective way to store C through forest management? Is …	No Management	1. The potential for CO2 fertilization effects on plant growth is also major source of uncertainty	Northeast US; encompassing portions of upstate New York, Vermont,NewHampshire, and Maine	N/A	No	N/A	aboveground C + wood products	1. carbon flux between aboveground forest biomass (dead and live pools) and harvested wood products 2. In this study we are particularly interested in aboveground C storage, and thus use the term‘‘sequestration’’ to refer to total C stocks (aboveground forest biomass +wood products), rather than uptake rates 3. Slash was not included in the aboveground dead wood carbon calculations when removed f…	N/A	N/A	N/A	N/A	N/A	No Management	Shelterwood_Low_U2 Forest with/without harvested wood products C uptake rate for 160 year simulation period (MgC/ha/yr) Shelterwood = structural retention indicator; a shelterwood (Nyland, 1996) represented greater (high) structural retention, with the retention of six legacy trees (canopy trees never harvested) Even-aged stands Low = harvesting frequency 120 years	N/A	N/A	N/A	N/A	Not used	1. In order to isolate the effect of in situ forest carbon storage and harvested wood products, we did not include the emissions benefits associated with substituting wood fiber for other construction materials or energy sources.	N/A	N/A	N/A	Positive	N/A	160 years	N/A	Discussed in Discussion section	N/A	1. To clarify the relative importance of uptake rates versus storage in our estimates of total predicted sequestration, we calculated average annual C uptake rates three different ways (Table 9): (1) C uptake rate per harvest cycle with the inclusion of wood products (U1); (2) C uptake rate for 160 simulation period without the inclusion of C stored in wood products (U2); and (3) C uptake rate fo…	-0.02 - U2 Forest C uptake rate for 160 year simulation period (MgC/ha/yr) 0.02 - U3 Forest and harvested wood products C uptake rate for 160 year simulation period (MgC/ha/yr)	N/A	N/A	N/A	N/A	N/A	N/A	1. Our findings suggest that passive or less intensive management are the most effective management techniques for achieving addi- tionality, assuming no inclusion of substitution effects and market mechanisms to minimize displacement of timber harvesting to other properties or regions. We showed that even with consider- ation of C sequestered in harvested wood products, unmanaged northern hardwo…	N/A	N/A
11	Nunery	Forest carbon storage in the northeastern United States: Net effects of harvesting frequency, post-harvest retention, and wood products	2010	Harvest carbon store modeling	1. This study uses a widely accepted forest growth model to examine C sequestration tradeoffs among harvesting frequency and post-harvest structural retention under even- and uneven- aged forest management, while incorporating fluxes to wood products. We address a fundamental research question facing forest managers, namely: what is the most effective way to store C through forest management? Is …	No Management	1. The potential for CO2 fertilization effects on plant growth is also major source of uncertainty	Northeast US; encompassing portions of upstate New York, Vermont,NewHampshire, and Maine	N/A	No	N/A	aboveground C + wood products	1. carbon flux between aboveground forest biomass (dead and live pools) and harvested wood products 2. In this study we are particularly interested in aboveground C storage, and thus use the term‘‘sequestration’’ to refer to total C stocks (aboveground forest biomass +wood products), rather than uptake rates 3. Slash was not included in the aboveground dead wood carbon calculations when removed f…	N/A	N/A	N/A	N/A	N/A	No Management	ITS_LowHigh_U2 Forest with/without harvested wood products C uptake rate for 160 year simulation period (MgC/ha/yr) ITS = uneven aged stands Low = no legacy trees remaining, smaller residual basal area High = harvest frequency of 15 years	N/A	N/A	N/A	N/A	Not used	1. In order to isolate the effect of in situ forest carbon storage and harvested wood products, we did not include the emissions benefits associated with substituting wood fiber for other construction materials or energy sources.	N/A	N/A	N/A	Positive	N/A	160 years	N/A	Discussed in Discussion section	N/A	1. To clarify the relative importance of uptake rates versus storage in our estimates of total predicted sequestration, we calculated average annual C uptake rates three different ways (Table 9): (1) C uptake rate per harvest cycle with the inclusion of wood products (U1); (2) C uptake rate for 160 simulation period without the inclusion of C stored in wood products (U2); and (3) C uptake rate fo…	-0.04 - U2 Forest C uptake rate for 160 year simulation period (MgC/ha/yr) 0.07 - U3 Forest and harvested wood products C uptake rate for 160 year simulation period (MgC/ha/yr)	N/A	N/A	N/A	N/A	N/A	N/A	1. Our findings suggest that passive or less intensive management are the most effective management techniques for achieving addi- tionality, assuming no inclusion of substitution effects and market mechanisms to minimize displacement of timber harvesting to other properties or regions. We showed that even with consider- ation of C sequestered in harvested wood products, unmanaged northern hardwo…	N/A	N/A
11	Nunery	Forest carbon storage in the northeastern United States: Net effects of harvesting frequency, post-harvest retention, and wood products	2010	Harvest carbon store modeling	1. This study uses a widely accepted forest growth model to examine C sequestration tradeoffs among harvesting frequency and post-harvest structural retention under even- and uneven- aged forest management, while incorporating fluxes to wood products. We address a fundamental research question facing forest managers, namely: what is the most effective way to store C through forest management? Is …	No Management	1. The potential for CO2 fertilization effects on plant growth is also major source of uncertainty	Northeast US; encompassing portions of upstate New York, Vermont,NewHampshire, and Maine	N/A	No	N/A	aboveground C + wood products	1. carbon flux between aboveground forest biomass (dead and live pools) and harvested wood products 2. In this study we are particularly interested in aboveground C storage, and thus use the term‘‘sequestration’’ to refer to total C stocks (aboveground forest biomass +wood products), rather than uptake rates 3. Slash was not included in the aboveground dead wood carbon calculations when removed f…	N/A	N/A	N/A	N/A	N/A	No Management	ITS_LowLow_U2 Forest with/without harvested wood products C uptake rate for 160 year simulation period (MgC/ha/yr) ITS = uneven aged stands 1st Low = no legacy trees remaining, smaller residual basal area 2nd Low = harvest frequency of 30 years	N/A	N/A	N/A	N/A	Not used	1. In order to isolate the effect of in situ forest carbon storage and harvested wood products, we did not include the emissions benefits associated with substituting wood fiber for other construction materials or energy sources.	N/A	N/A	N/A	Positive	N/A	160 years	N/A	Discussed in Discussion section	N/A	1. To clarify the relative importance of uptake rates versus storage in our estimates of total predicted sequestration, we calculated average annual C uptake rates three different ways (Table 9): (1) C uptake rate per harvest cycle with the inclusion of wood products (U1); (2) C uptake rate for 160 simulation period without the inclusion of C stored in wood products (U2); and (3) C uptake rate fo…	-0.04 - U2 Forest C uptake rate for 160 year simulation period (MgC/ha/yr) 0.08 - U3 Forest and harvested wood products C uptake rate for 160 year simulation period (MgC/ha/yr)	N/A	N/A	N/A	N/A	N/A	N/A	1. Our findings suggest that passive or less intensive management are the most effective management techniques for achieving addi- tionality, assuming no inclusion of substitution effects and market mechanisms to minimize displacement of timber harvesting to other properties or regions. We showed that even with consider- ation of C sequestered in harvested wood products, unmanaged northern hardwo…	N/A	N/A
11	Nunery	Forest carbon storage in the northeastern United States: Net effects of harvesting frequency, post-harvest retention, and wood products	2010	Harvest carbon store modeling	1. This study uses a widely accepted forest growth model to examine C sequestration tradeoffs among harvesting frequency and post-harvest structural retention under even- and uneven- aged forest management, while incorporating fluxes to wood products. We address a fundamental research question facing forest managers, namely: what is the most effective way to store C through forest management? Is …	No Management	1. The potential for CO2 fertilization effects on plant growth is also major source of uncertainty	Northeast US; encompassing portions of upstate New York, Vermont,NewHampshire, and Maine	N/A	No	N/A	aboveground C + wood products	1. carbon flux between aboveground forest biomass (dead and live pools) and harvested wood products 2. In this study we are particularly interested in aboveground C storage, and thus use the term‘‘sequestration’’ to refer to total C stocks (aboveground forest biomass +wood products), rather than uptake rates 3. Slash was not included in the aboveground dead wood carbon calculations when removed f…	N/A	N/A	N/A	N/A	N/A	No Management	ITS_HighHigh_U2 Forest with/without harvested wood products C uptake rate for 160 year simulation period (MgC/ha/yr) ITS = uneven aged stands 1st High = 12 legacy trees remaining, larger residual basal area 2nd High = harvest frequency of 15 years	N/A	N/A	N/A	N/A	Not used	1. In order to isolate the effect of in situ forest carbon storage and harvested wood products, we did not include the emissions benefits associated with substituting wood fiber for other construction materials or energy sources.	N/A	N/A	N/A	Positive	N/A	160 years	N/A	Discussed in Discussion section	N/A	1. To clarify the relative importance of uptake rates versus storage in our estimates of total predicted sequestration, we calculated average annual C uptake rates three different ways (Table 9): (1) C uptake rate per harvest cycle with the inclusion of wood products (U1); (2) C uptake rate for 160 simulation period without the inclusion of C stored in wood products (U2); and (3) C uptake rate fo…	0.02 - U2 Forest C uptake rate for 160 year simulation period (MgC/ha/yr) 0.14 - U3 Forest and harvested wood products C uptake rate for 160 year simulation period (MgC/ha/yr)	N/A	N/A	N/A	N/A	N/A	N/A	1. Our findings suggest that passive or less intensive management are the most effective management techniques for achieving addi- tionality, assuming no inclusion of substitution effects and market mechanisms to minimize displacement of timber harvesting to other properties or regions. We showed that even with consider- ation of C sequestered in harvested wood products, unmanaged northern hardwo…	N/A	N/A
11	Nunery	Forest carbon storage in the northeastern United States: Net effects of harvesting frequency, post-harvest retention, and wood products	2010	Harvest carbon store modeling	1. This study uses a widely accepted forest growth model to examine C sequestration tradeoffs among harvesting frequency and post-harvest structural retention under even- and uneven- aged forest management, while incorporating fluxes to wood products. We address a fundamental research question facing forest managers, namely: what is the most effective way to store C through forest management? Is …	No Management	1. The potential for CO2 fertilization effects on plant growth is also major source of uncertainty	Northeast US; encompassing portions of upstate New York, Vermont,NewHampshire, and Maine	N/A	No	N/A	aboveground C + wood products	1. carbon flux between aboveground forest biomass (dead and live pools) and harvested wood products 2. In this study we are particularly interested in aboveground C storage, and thus use the term‘‘sequestration’’ to refer to total C stocks (aboveground forest biomass +wood products), rather than uptake rates 3. Slash was not included in the aboveground dead wood carbon calculations when removed f…	N/A	N/A	N/A	N/A	N/A	No Management	ITS_HighLow_U2 Forest with/without harvested wood products C uptake rate for 160 year simulation period (MgC/ha/yr) ITS = uneven aged stands High = 12 legacy trees remaining, larger residual basal area Low = harvest frequency of 30 years	N/A	N/A	N/A	N/A	Not used	1. In order to isolate the effect of in situ forest carbon storage and harvested wood products, we did not include the emissions benefits associated with substituting wood fiber for other construction materials or energy sources.	N/A	N/A	N/A	Positive	N/A	160 years	N/A	Discussed in Discussion section	N/A	1. To clarify the relative importance of uptake rates versus storage in our estimates of total predicted sequestration, we calculated average annual C uptake rates three different ways (Table 9): (1) C uptake rate per harvest cycle with the inclusion of wood products (U1); (2) C uptake rate for 160 simulation period without the inclusion of C stored in wood products (U2); and (3) C uptake rate fo…	0.02 - U2 Forest C uptake rate for 160 year simulation period (MgC/ha/yr) 0.14 - U3 Forest and harvested wood products C uptake rate for 160 year simulation period (MgC/ha/yr)	N/A	N/A	N/A	N/A	N/A	N/A	1. Our findings suggest that passive or less intensive management are the most effective management techniques for achieving addi- tionality, assuming no inclusion of substitution effects and market mechanisms to minimize displacement of timber harvesting to other properties or regions. We showed that even with consider- ation of C sequestered in harvested wood products, unmanaged northern hardwo…	N/A	N/A
11	Nunery	Forest carbon storage in the northeastern United States: Net effects of harvesting frequency, post-harvest retention, and wood products	2010	Harvest carbon store modeling	1. This study uses a widely accepted forest growth model to examine C sequestration tradeoffs among harvesting frequency and post-harvest structural retention under even- and uneven- aged forest management, while incorporating fluxes to wood products. We address a fundamental research question facing forest managers, namely: what is the most effective way to store C through forest management? Is …	No Management	1. The potential for CO2 fertilization effects on plant growth is also major source of uncertainty	Northeast US; encompassing portions of upstate New York, Vermont,NewHampshire, and Maine	N/A	No	N/A	aboveground C + wood products	1. carbon flux between aboveground forest biomass (dead and live pools) and harvested wood products 2. In this study we are particularly interested in aboveground C storage, and thus use the term‘‘sequestration’’ to refer to total C stocks (aboveground forest biomass +wood products), rather than uptake rates 3. Slash was not included in the aboveground dead wood carbon calculations when removed f…	N/A	N/A	N/A	N/A	N/A	No Management	No Management__U2 Forest without harvested wood products C uptake rate for 160 year simulation period (MgC/ha/yr)	N/A	N/A	N/A	N/A	Not used	1. In order to isolate the effect of in situ forest carbon storage and harvested wood products, we did not include the emissions benefits associated with substituting wood fiber for other construction materials or energy sources.	N/A	N/A	N/A	Positive	N/A	160 years	N/A	Discussed in Discussion section	N/A	1. To clarify the relative importance of uptake rates versus storage in our estimates of total predicted sequestration, we calculated average annual C uptake rates three different ways (Table 9): (1) C uptake rate per harvest cycle with the inclusion of wood products (U1); (2) C uptake rate for 160 simulation period without the inclusion of C stored in wood products (U2); and (3) C uptake rate fo…	0.36 - U2 Forest C uptake rate for 160 year simulation period (MgC/ha/yr) N/A U3 Forest and harvested wood products C uptake rate for 160 year simulation period (MgC/ha/yr)	N/A	N/A	N/A	N/A	N/A	N/A	1. Our findings suggest that passive or less intensive management are the most effective management techniques for achieving addi- tionality, assuming no inclusion of substitution effects and market mechanisms to minimize displacement of timber harvesting to other properties or regions. We showed that even with consider- ation of C sequestered in harvested wood products, unmanaged northern hardwo…	N/A	N/A
11	Ingerson	Wood Products and Carbon Storage: Can Increased Production Help Solve the Climate Crisis?	2009	Life cycle carbon accounting	1. Report draws on a variety of sources to illuminate the greenhouse gas impacts of wood products and wood biomass fuels throughout their life-cycles. 2. Our report also takes a closer look at one particular policy mechanism, which could reward wood products carbon storage: the use of forest-carbon offsets in voluntary (market-based) or regulatory programs. Because such offsets are expected to ba…	Conservation	1. Systematic data are lacking on the percentage of wood products that are discarded before the end of their useful lives, but a few statistics indicate that this is likely to be a significant source of wood carbon losses. Residential repairs and renovations utilized 61% as much lumber, 42% as many square feet of structural panels, and 60% as many square feet of nonstructural panels, as new const…	United States	N/A	No	N/A	harvested stem / C stored in wood products	N/A	N/A	N/A	N/A	N/A	1. Timber operations that remove invasive exotic species can produce more diverse stands that better resist stresses from droughts to pest outbreaks; by the same token, disturbance from harvest activities can also help spread invasives that inhibit regeneration of tree species with high carbon storage potential.	Unmanaged forest (no harvest); Since the alternative to harvesting trees would be to leave them standing, in this report we express losses at each step in the processing chain as a percentage of carbon in the standing tree	Low range of wood losses through the processing chain and after 100 years in use	N/A	N/A	N/A	N/A	Not used	N/A	N/A	1. Accounting protocols also acknowledge the emissions from carbon intensive pesticides, herbicides, and fertilizers applied on forestlands. As more land is harvested through even-aged clearcutting techniques, more chemicals are required and more emissions are generated relative to harvest techniques that rely on natural regeneration.	N/A	Positive	1. Current forest practices that include short rotations, extensive timber plantations, clearcutting, and a rapid rate of harvest maintain lands in a high-risk condition for all these threats due to homogenization of fuel loads and retention of logging slash on site among other factors. 2. Long rotations and alternatives to clearcutting and chemical spraying should be high on the list of such str…	100 years	1. NOTE: In fire-prone forests, thinnings that reduce excess fuel loads may reduce the frequency or severity of fire, protecting forest carbon reservoirs into the future (Oneil et al. 2007). However, thinning in moist forests may make forests more vulnerable to ice damage or wind throw.	1. Because of methane’s climate impacts, landfilled wood waste from mills, construction sites, and house demolition stores only about 13% of the CO2e present in the standing-tree (checkered bars in Figure 2). Including the carbon remaining in wood products in use (solid bars in Figure 2), total harvested wood CO2e at 100 years is about 14% of that present in the standing tree.	1. The majority of long-term off-site wood carbon storage occurs in land- fills, where decomposing wood gives off significant amounts of methane; discarded wood in landfills actually stores much more carbon than the wood in long-lived products in use; Various studies have assumed that anywhere between 20% and 80% of landfilled wood is subject to decay (Borjesson and Gustavsson 2000). 1a. The Wood…	1. We assume that carbon density in wood products is similar to that in the live tree, so that losses in wood volume provide rough estimates of carbon losses at each step 2. This system boundary excludes several less direct effects of wood harvesting activities, including the longer-term impacts of wood harvest on forest carbon, the impacts of wood fuels on fossil fuel consumption, and possible s…	52% (48% remaining) Reductions in Wood (cumulative losses) Available for Long-Lived Wood Products after 100 years; (% of Live-Tree Volume) (low case; Low and high estimates are from different analyses or regions. Medium estimate is national average (for harvest losses, fuelwood, and pulp), simple average of low and high estimates (for primary processing – mill and in-use), or weighted average (fo…	N/A	N/A	1. Biomass is often considered a “carbon-neutral” fuel, but its true climate impact depends upon management of the source forest and efficiency of use 2. Wood fuels clearly have much lower GHG emissions from processing and transport than fossil fuels, but their fossil-based emissions are not zero. Liquid 3. Wood has a lower hydrogen content than fossil fuels, which causes it to release more carbo…	N/A	N/A	N/A	1. Taking the entire life-cycle of these products into account, it becomes clear that an increased use of wood fuels and lumber will have very little net effect on climate change. To the contrary, the impact is as likely to be negative as positive. 2. Our nation must transform an economy based on centuries of inexpensive fossil energy into one that will operate on a truly sustainable, renewable b…	1. EMISSIONS FROM EACH PHASE 1a. HARVEST: A CORRIM study (Johnson et al. 2005) found emissions from fossil fuels used in harvest, replanting, and fertilization—plus methane and nitrous oxide (N2O, a greenhouse gas more than 300 times more potent then CO2)—of about 0.9%* to 1.3%* of CO2e in the raw log. 1b. PRIMARY PROCESSING: CORRIM studies found fossil fuel-related emissions for processing of fo…	N/A
11	Ingerson	Wood Products and Carbon Storage: Can Increased Production Help Solve the Climate Crisis?	2009	Life cycle carbon accounting	1. Report draws on a variety of sources to illuminate the greenhouse gas impacts of wood products and wood biomass fuels throughout their life-cycles. 2. Our report also takes a closer look at one particular policy mechanism, which could reward wood products carbon storage: the use of forest-carbon offsets in voluntary (market-based) or regulatory programs. Because such offsets are expected to ba…	Conservation	1. Systematic data are lacking on the percentage of wood products that are discarded before the end of their useful lives, but a few statistics indicate that this is likely to be a significant source of wood carbon losses. Residential repairs and renovations utilized 61% as much lumber, 42% as many square feet of structural panels, and 60% as many square feet of nonstructural panels, as new const…	United States	N/A	No	N/A	harvested stem / C stored in wood products	N/A	N/A	N/A	N/A	N/A	1. Timber operations that remove invasive exotic species can produce more diverse stands that better resist stresses from droughts to pest outbreaks; by the same token, disturbance from harvest activities can also help spread invasives that inhibit regeneration of tree species with high carbon storage potential.	Unmanaged forest (no harvest); Since the alternative to harvesting trees would be to leave them standing, in this report we express losses at each step in the processing chain as a percentage of carbon in the standing tree	Medium range of wood losses through the processing chain and after 100 years in use	N/A	N/A	N/A	N/A	Not used	N/A	N/A	1. Accounting protocols also acknowledge the emissions from carbon intensive pesticides, herbicides, and fertilizers applied on forestlands. As more land is harvested through even-aged clearcutting techniques, more chemicals are required and more emissions are generated relative to harvest techniques that rely on natural regeneration.	N/A	Positive	1. Current forest practices that include short rotations, extensive timber plantations, clearcutting, and a rapid rate of harvest maintain lands in a high-risk condition for all these threats due to homogenization of fuel loads and retention of logging slash on site among other factors. 2. Long rotations and alternatives to clearcutting and chemical spraying should be high on the list of such str…	100 years	1. NOTE: In fire-prone forests, thinnings that reduce excess fuel loads may reduce the frequency or severity of fire, protecting forest carbon reservoirs into the future (Oneil et al. 2007). However, thinning in moist forests may make forests more vulnerable to ice damage or wind throw.	1. Because of methane’s climate impacts, landfilled wood waste from mills, construction sites, and house demolition stores only about 13% of the CO2e present in the standing-tree (checkered bars in Figure 2). Including the carbon remaining in wood products in use (solid bars in Figure 2), total harvested wood CO2e at 100 years is about 14% of that present in the standing tree.	1. The majority of long-term off-site wood carbon storage occurs in land- fills, where decomposing wood gives off significant amounts of methane; discarded wood in landfills actually stores much more carbon than the wood in long-lived products in use; Various studies have assumed that anywhere between 20% and 80% of landfilled wood is subject to decay (Borjesson and Gustavsson 2000). 1a. The Wood…	1. We assume that carbon density in wood products is similar to that in the live tree, so that losses in wood volume provide rough estimates of carbon losses at each step 2. This system boundary excludes several less direct effects of wood harvesting activities, including the longer-term impacts of wood harvest on forest carbon, the impacts of wood fuels on fossil fuel consumption, and possible s…	99% (1% remaining) Reductions in Wood (cumulative losses) Available for Long-Lived Wood Products; (% of Live-Tree Volume); (medium case; Low and high estimates are from different analyses or regions. Medium estimate is national average (for harvest losses, fuelwood, and pulp), simple average of low and high estimates (for primary processing – mill and in-use), or weighted average (for secondary p…	N/A	N/A	1. Biomass is often considered a “carbon-neutral” fuel, but its true climate impact depends upon management of the source forest and efficiency of use 2. Wood fuels clearly have much lower GHG emissions from processing and transport than fossil fuels, but their fossil-based emissions are not zero. Liquid 3. Wood has a lower hydrogen content than fossil fuels, which causes it to release more carbo…	N/A	N/A	N/A	1. Taking the entire life-cycle of these products into account, it becomes clear that an increased use of wood fuels and lumber will have very little net effect on climate change. To the contrary, the impact is as likely to be negative as positive. 2. Our nation must transform an economy based on centuries of inexpensive fossil energy into one that will operate on a truly sustainable, renewable b…	1. EMISSIONS FROM EACH PHASE 1a. HARVEST: A CORRIM study (Johnson et al. 2005) found emissions from fossil fuels used in harvest, replanting, and fertilization—plus methane and nitrous oxide (N2O, a greenhouse gas more than 300 times more potent then CO2)—of about 0.9%* to 1.3%* of CO2e in the raw log. 1b. PRIMARY PROCESSING: CORRIM studies found fossil fuel-related emissions for processing of fo…	N/A
11	Ingerson	Wood Products and Carbon Storage: Can Increased Production Help Solve the Climate Crisis?	2009	Life cycle carbon accounting	1. Report draws on a variety of sources to illuminate the greenhouse gas impacts of wood products and wood biomass fuels throughout their life-cycles. 2. Our report also takes a closer look at one particular policy mechanism, which could reward wood products carbon storage: the use of forest-carbon offsets in voluntary (market-based) or regulatory programs. Because such offsets are expected to ba…	Conservation	1. Systematic data are lacking on the percentage of wood products that are discarded before the end of their useful lives, but a few statistics indicate that this is likely to be a significant source of wood carbon losses. Residential repairs and renovations utilized 61% as much lumber, 42% as many square feet of structural panels, and 60% as many square feet of nonstructural panels, as new const…	United States	N/A	No	N/A	harvested stem / C stored in wood products	N/A	N/A	N/A	N/A	N/A	1. Timber operations that remove invasive exotic species can produce more diverse stands that better resist stresses from droughts to pest outbreaks; by the same token, disturbance from harvest activities can also help spread invasives that inhibit regeneration of tree species with high carbon storage potential.	Unmanaged forest (no harvest); Since the alternative to harvesting trees would be to leave them standing, in this report we express losses at each step in the processing chain as a percentage of carbon in the standing tree	High range of wood losses through the processing chain and after 100 years in use	N/A	N/A	N/A	N/A	Not used	N/A	N/A	1. Accounting protocols also acknowledge the emissions from carbon intensive pesticides, herbicides, and fertilizers applied on forestlands. As more land is harvested through even-aged clearcutting techniques, more chemicals are required and more emissions are generated relative to harvest techniques that rely on natural regeneration.	N/A	Positive	1. Current forest practices that include short rotations, extensive timber plantations, clearcutting, and a rapid rate of harvest maintain lands in a high-risk condition for all these threats due to homogenization of fuel loads and retention of logging slash on site among other factors. 2. Long rotations and alternatives to clearcutting and chemical spraying should be high on the list of such str…	100 years	1. NOTE: In fire-prone forests, thinnings that reduce excess fuel loads may reduce the frequency or severity of fire, protecting forest carbon reservoirs into the future (Oneil et al. 2007). However, thinning in moist forests may make forests more vulnerable to ice damage or wind throw.	1. Because of methane’s climate impacts, landfilled wood waste from mills, construction sites, and house demolition stores only about 13% of the CO2e present in the standing-tree (checkered bars in Figure 2). Including the carbon remaining in wood products in use (solid bars in Figure 2), total harvested wood CO2e at 100 years is about 14% of that present in the standing tree.	1. The majority of long-term off-site wood carbon storage occurs in land- fills, where decomposing wood gives off significant amounts of methane; discarded wood in landfills actually stores much more carbon than the wood in long-lived products in use; Various studies have assumed that anywhere between 20% and 80% of landfilled wood is subject to decay (Borjesson and Gustavsson 2000). 1a. The Wood…	1. We assume that carbon density in wood products is similar to that in the live tree, so that losses in wood volume provide rough estimates of carbon losses at each step 2. This system boundary excludes several less direct effects of wood harvesting activities, including the longer-term impacts of wood harvest on forest carbon, the impacts of wood fuels on fossil fuel consumption, and possible s…	186% (nothing remaining, source) Reductions in Wood (cumulative losses) Available for Long-Lived Wood Products; (% of Live-Tree Volume); (high case; Low and high estimates are from different analyses or regions. Medium estimate is national average (for harvest losses, fuelwood, and pulp), simple average of low and high estimates (for primary processing – mill and in-use), or weighted average (for…	N/A	N/A	1. Biomass is often considered a “carbon-neutral” fuel, but its true climate impact depends upon management of the source forest and efficiency of use 2. Wood fuels clearly have much lower GHG emissions from processing and transport than fossil fuels, but their fossil-based emissions are not zero. Liquid 3. Wood has a lower hydrogen content than fossil fuels, which causes it to release more carbo…	N/A	N/A	N/A	1. Taking the entire life-cycle of these products into account, it becomes clear that an increased use of wood fuels and lumber will have very little net effect on climate change. To the contrary, the impact is as likely to be negative as positive. 2. Our nation must transform an economy based on centuries of inexpensive fossil energy into one that will operate on a truly sustainable, renewable b…	1. EMISSIONS FROM EACH PHASE 1a. HARVEST: A CORRIM study (Johnson et al. 2005) found emissions from fossil fuels used in harvest, replanting, and fertilization—plus methane and nitrous oxide (N2O, a greenhouse gas more than 300 times more potent then CO2)—of about 0.9%* to 1.3%* of CO2e in the raw log. 1b. PRIMARY PROCESSING: CORRIM studies found fossil fuel-related emissions for processing of fo…	N/A
12	Ingerson	Wood Products and Carbon Storage: Can Increased Production Help Solve the Climate Crisis?	2009	Life cycle carbon accounting	1. Report draws on a variety of sources to illuminate the greenhouse gas impacts of wood products and wood biomass fuels throughout their life-cycles. 2. Our report also takes a closer look at one particular policy mechanism, which could reward wood products carbon storage: the use of forest-carbon offsets in voluntary (market-based) or regulatory programs. Because such offsets are expected to ba…	Conservation	1. Systematic data are lacking on the percentage of wood products that are discarded before the end of their useful lives, but a few statistics indicate that this is likely to be a significant source of wood carbon losses. Residential repairs and renovations utilized 61% as much lumber, 42% as many square feet of structural panels, and 60% as many square feet of nonstructural panels, as new const…	United States	N/A	No	N/A	harvested stem / C stored in wood products	N/A	N/A	N/A	N/A	N/A	1. Timber operations that remove invasive exotic species can produce more diverse stands that better resist stresses from droughts to pest outbreaks; by the same token, disturbance from harvest activities can also help spread invasives that inhibit regeneration of tree species with high carbon storage potential.	Unmanaged forest (no harvest); Since the alternative to harvesting trees would be to leave them standing, in this report we express losses at each step in the processing chain as a percentage of carbon in the standing tree	% of the carbon originally present in the standing tree that’s in landfills	N/A	N/A	N/A	N/A	Not used	1. Comment: The ultimate impact of expanded lumber production on GHG emissions depends on a) the elasticity of substitution of wood for alternative materials, b) the impact of materials availability on housing supplies, and c) the elasticity of demand for housing	N/A	1. Accounting protocols also acknowledge the emissions from carbon intensive pesticides, herbicides, and fertilizers applied on forestlands. As more land is harvested through even-aged clearcutting techniques, more chemicals are required and more emissions are generated relative to harvest techniques that rely on natural regeneration.	N/A	Positive	N/A	100 years	1. NOTE: In fire-prone forests, thinnings that reduce excess fuel loads may reduce the frequency or severity of fire, protecting forest carbon reservoirs into the future (Oneil et al. 2007). However, thinning in moist forests may make forests more vulnerable to ice damage or wind throw.	1. Because of methane’s climate impacts, landfilled wood waste from mills, construction sites, and house demolition stores only about 13% of the CO2e present in the standing-tree (checkered bars in Figure 2). Including the carbon remaining in wood products in use (solid bars in Figure 2), total harvested wood CO2e at 100 years is about 14% of that present in the standing tree.	1. The majority of long-term off-site wood carbon storage occurs in land- fills, where decomposing wood gives off significant amounts of methane; discarded wood in landfills actually stores much more carbon than the wood in long-lived products in use; Various studies have assumed that anywhere between 20% and 80% of landfilled wood is subject to decay (Borjesson and Gustavsson 2000). 1a. The Wood…	1. We assume that carbon density in wood products is similar to that in the live tree, so that losses in wood volume provide rough estimates of carbon losses at each step 2. This system boundary excludes several less direct effects of wood harvesting activities, including the longer-term impacts of wood harvest on forest carbon, the impacts of wood fuels on fossil fuel consumption, and possible s…	N/A	0.13	% of the carbon originally present in the standing tree that’s in landfills	1. Biomass is often considered a “carbon-neutral” fuel, but its true climate impact depends upon management of the source forest and efficiency of use 2. Wood fuels clearly have much lower GHG emissions from processing and transport than fossil fuels, but their fossil-based emissions are not zero. Liquid 3. Wood has a lower hydrogen content than fossil fuels, which causes it to release more carbo…	N/A	N/A	N/A	1. Taking the entire life-cycle of these products into account, it becomes clear that an increased use of wood fuels and lumber will have very little net effect on climate change. To the contrary, the impact is as likely to be negative as positive. 2. Our nation must transform an economy based on centuries of inexpensive fossil energy into one that will operate on a truly sustainable, renewable b…	1. EMISSIONS FROM EACH PHASE 1a. HARVEST: A CORRIM study (Johnson et al. 2005) found emissions from fossil fuels used in harvest, replanting, and fertilization—plus methane and nitrous oxide (N2O, a greenhouse gas more than 300 times more potent then CO2)—of about 0.9%* to 1.3%* of CO2e in the raw log. 1b. PRIMARY PROCESSING: CORRIM studies found fossil fuel-related emissions for processing of fo…	N/A
12	Ingerson	Wood Products and Carbon Storage: Can Increased Production Help Solve the Climate Crisis?	2009	Life cycle carbon accounting	1. Report draws on a variety of sources to illuminate the greenhouse gas impacts of wood products and wood biomass fuels throughout their life-cycles. 2. Our report also takes a closer look at one particular policy mechanism, which could reward wood products carbon storage: the use of forest-carbon offsets in voluntary (market-based) or regulatory programs. Because such offsets are expected to ba…	Conservation	1. Systematic data are lacking on the percentage of wood products that are discarded before the end of their useful lives, but a few statistics indicate that this is likely to be a significant source of wood carbon losses. Residential repairs and renovations utilized 61% as much lumber, 42% as many square feet of structural panels, and 60% as many square feet of nonstructural panels, as new const…	United States	N/A	No	N/A	harvested stem / C stored in wood products	N/A	N/A	N/A	N/A	N/A	1. Timber operations that remove invasive exotic species can produce more diverse stands that better resist stresses from droughts to pest outbreaks; by the same token, disturbance from harvest activities can also help spread invasives that inhibit regeneration of tree species with high carbon storage potential.	Unmanaged forest (no harvest); Since the alternative to harvesting trees would be to leave them standing, in this report we express losses at each step in the processing chain as a percentage of carbon in the standing tree	Estimates of Carbon Stored in Wood Products in the year 100	N/A	N/A	N/A	N/A	Not used	1. Comment: The ultimate impact of expanded lumber production on GHG emissions depends on a) the elasticity of substitution of wood for alternative materials, b) the impact of materials availability on housing supplies, and c) the elasticity of demand for housing	N/A	1. Accounting protocols also acknowledge the emissions from carbon intensive pesticides, herbicides, and fertilizers applied on forestlands. As more land is harvested through even-aged clearcutting techniques, more chemicals are required and more emissions are generated relative to harvest techniques that rely on natural regeneration.	N/A	Positive	N/A	100 years	1. NOTE: In fire-prone forests, thinnings that reduce excess fuel loads may reduce the frequency or severity of fire, protecting forest carbon reservoirs into the future (Oneil et al. 2007). However, thinning in moist forests may make forests more vulnerable to ice damage or wind throw.	1. Because of methane’s climate impacts, landfilled wood waste from mills, construction sites, and house demolition stores only about 13% of the CO2e present in the standing-tree (checkered bars in Figure 2). Including the carbon remaining in wood products in use (solid bars in Figure 2), total harvested wood CO2e at 100 years is about 14% of that present in the standing tree.	1. The majority of long-term off-site wood carbon storage occurs in land- fills, where decomposing wood gives off significant amounts of methane; discarded wood in landfills actually stores much more carbon than the wood in long-lived products in use; Various studies have assumed that anywhere between 20% and 80% of landfilled wood is subject to decay (Borjesson and Gustavsson 2000). 1a. The Wood…	1. We assume that carbon density in wood products is similar to that in the live tree, so that losses in wood volume provide rough estimates of carbon losses at each step 2. This system boundary excludes several less direct effects of wood harvesting activities, including the longer-term impacts of wood harvest on forest carbon, the impacts of wood fuels on fossil fuel consumption, and possible s…	N/A	0-4.6% (18% of live tree available to go into a wood product)	Estimates of Carbon Stored in Wood Products in the year 100 (% of Total Carbon in Standing Tree)	1. Biomass is often considered a “carbon-neutral” fuel, but its true climate impact depends upon management of the source forest and efficiency of use 2. Wood fuels clearly have much lower GHG emissions from processing and transport than fossil fuels, but their fossil-based emissions are not zero. Liquid 3. Wood has a lower hydrogen content than fossil fuels, which causes it to release more carbo…	N/A	N/A	N/A	1. Taking the entire life-cycle of these products into account, it becomes clear that an increased use of wood fuels and lumber will have very little net effect on climate change. To the contrary, the impact is as likely to be negative as positive. 2. Our nation must transform an economy based on centuries of inexpensive fossil energy into one that will operate on a truly sustainable, renewable b…	1. EMISSIONS FROM EACH PHASE 1a. HARVEST: A CORRIM study (Johnson et al. 2005) found emissions from fossil fuels used in harvest, replanting, and fertilization—plus methane and nitrous oxide (N2O, a greenhouse gas more than 300 times more potent then CO2)—of about 0.9%* to 1.3%* of CO2e in the raw log. 1b. PRIMARY PROCESSING: CORRIM studies found fossil fuel-related emissions for processing of fo…	N/A
12	Ingerson	Wood Products and Carbon Storage: Can Increased Production Help Solve the Climate Crisis?	2009	Life cycle carbon accounting	1. Report draws on a variety of sources to illuminate the greenhouse gas impacts of wood products and wood biomass fuels throughout their life-cycles. 2. Our report also takes a closer look at one particular policy mechanism, which could reward wood products carbon storage: the use of forest-carbon offsets in voluntary (market-based) or regulatory programs. Because such offsets are expected to ba…	Conservation	1. Systematic data are lacking on the percentage of wood products that are discarded before the end of their useful lives, but a few statistics indicate that this is likely to be a significant source of wood carbon losses. Residential repairs and renovations utilized 61% as much lumber, 42% as many square feet of structural panels, and 60% as many square feet of nonstructural panels, as new const…	United States	N/A	No	N/A	harvested stem / C stored in wood products	N/A	N/A	N/A	N/A	N/A	1. Timber operations that remove invasive exotic species can produce more diverse stands that better resist stresses from droughts to pest outbreaks; by the same token, disturbance from harvest activities can also help spread invasives that inhibit regeneration of tree species with high carbon storage potential.	Unmanaged forest (no harvest); Since the alternative to harvesting trees would be to leave them standing, in this report we express losses at each step in the processing chain as a percentage of carbon in the standing tree	North Central region softwood pulp volume	N/A	N/A	N/A	N/A	Not used	1. Comment: The ultimate impact of expanded lumber production on GHG emissions depends on a) the elasticity of substitution of wood for alternative materials, b) the impact of materials availability on housing supplies, and c) the elasticity of demand for housing	N/A	1. Accounting protocols also acknowledge the emissions from carbon intensive pesticides, herbicides, and fertilizers applied on forestlands. As more land is harvested through even-aged clearcutting techniques, more chemicals are required and more emissions are generated relative to harvest techniques that rely on natural regeneration.	N/A	Positive	N/A	100 years	1. NOTE: In fire-prone forests, thinnings that reduce excess fuel loads may reduce the frequency or severity of fire, protecting forest carbon reservoirs into the future (Oneil et al. 2007). However, thinning in moist forests may make forests more vulnerable to ice damage or wind throw.	1. Because of methane’s climate impacts, landfilled wood waste from mills, construction sites, and house demolition stores only about 13% of the CO2e present in the standing-tree (checkered bars in Figure 2). Including the carbon remaining in wood products in use (solid bars in Figure 2), total harvested wood CO2e at 100 years is about 14% of that present in the standing tree.	1. The majority of long-term off-site wood carbon storage occurs in land- fills, where decomposing wood gives off significant amounts of methane; discarded wood in landfills actually stores much more carbon than the wood in long-lived products in use; Various studies have assumed that anywhere between 20% and 80% of landfilled wood is subject to decay (Borjesson and Gustavsson 2000). 1a. The Wood…	1. We assume that carbon density in wood products is similar to that in the live tree, so that losses in wood volume provide rough estimates of carbon losses at each step 2. This system boundary excludes several less direct effects of wood harvesting activities, including the longer-term impacts of wood harvest on forest carbon, the impacts of wood fuels on fossil fuel consumption, and possible s…	N/A	5% with over 91% of that in landfills	% of standing tree volume would remain in use or in landfills at 100 years	1. Biomass is often considered a “carbon-neutral” fuel, but its true climate impact depends upon management of the source forest and efficiency of use 2. Wood fuels clearly have much lower GHG emissions from processing and transport than fossil fuels, but their fossil-based emissions are not zero. Liquid 3. Wood has a lower hydrogen content than fossil fuels, which causes it to release more carbo…	N/A	N/A	N/A	1. Taking the entire life-cycle of these products into account, it becomes clear that an increased use of wood fuels and lumber will have very little net effect on climate change. To the contrary, the impact is as likely to be negative as positive. 2. Our nation must transform an economy based on centuries of inexpensive fossil energy into one that will operate on a truly sustainable, renewable b…	1. EMISSIONS FROM EACH PHASE 1a. HARVEST: A CORRIM study (Johnson et al. 2005) found emissions from fossil fuels used in harvest, replanting, and fertilization—plus methane and nitrous oxide (N2O, a greenhouse gas more than 300 times more potent then CO2)—of about 0.9%* to 1.3%* of CO2e in the raw log. 1b. PRIMARY PROCESSING: CORRIM studies found fossil fuel-related emissions for processing of fo…	N/A
12	Ingerson	Wood Products and Carbon Storage: Can Increased Production Help Solve the Climate Crisis?	2009	Life cycle carbon accounting	1. Report draws on a variety of sources to illuminate the greenhouse gas impacts of wood products and wood biomass fuels throughout their life-cycles. 2. Our report also takes a closer look at one particular policy mechanism, which could reward wood products carbon storage: the use of forest-carbon offsets in voluntary (market-based) or regulatory programs. Because such offsets are expected to ba…	Conservation	1. Systematic data are lacking on the percentage of wood products that are discarded before the end of their useful lives, but a few statistics indicate that this is likely to be a significant source of wood carbon losses. Residential repairs and renovations utilized 61% as much lumber, 42% as many square feet of structural panels, and 60% as many square feet of nonstructural panels, as new const…	United States	N/A	No	N/A	harvested stem / C stored in wood products	N/A	N/A	N/A	N/A	N/A	1. Timber operations that remove invasive exotic species can produce more diverse stands that better resist stresses from droughts to pest outbreaks; by the same token, disturbance from harvest activities can also help spread invasives that inhibit regeneration of tree species with high carbon storage potential.	Unmanaged forest (no harvest); Since the alternative to harvesting trees would be to leave them standing, in this report we express losses at each step in the processing chain as a percentage of carbon in the standing tree	Pacific Northwest Westside softwood sawlog volume	N/A	N/A	N/A	N/A	Not used	1. Comment: The ultimate impact of expanded lumber production on GHG emissions depends on a) the elasticity of substitution of wood for alternative materials, b) the impact of materials availability on housing supplies, and c) the elasticity of demand for housing	N/A	1. Accounting protocols also acknowledge the emissions from carbon intensive pesticides, herbicides, and fertilizers applied on forestlands. As more land is harvested through even-aged clearcutting techniques, more chemicals are required and more emissions are generated relative to harvest techniques that rely on natural regeneration.	N/A	Positive	N/A	100 years	1. NOTE: In fire-prone forests, thinnings that reduce excess fuel loads may reduce the frequency or severity of fire, protecting forest carbon reservoirs into the future (Oneil et al. 2007). However, thinning in moist forests may make forests more vulnerable to ice damage or wind throw.	1. Because of methane’s climate impacts, landfilled wood waste from mills, construction sites, and house demolition stores only about 13% of the CO2e present in the standing-tree (checkered bars in Figure 2). Including the carbon remaining in wood products in use (solid bars in Figure 2), total harvested wood CO2e at 100 years is about 14% of that present in the standing tree.	1. The majority of long-term off-site wood carbon storage occurs in land- fills, where decomposing wood gives off significant amounts of methane; discarded wood in landfills actually stores much more carbon than the wood in long-lived products in use; Various studies have assumed that anywhere between 20% and 80% of landfilled wood is subject to decay (Borjesson and Gustavsson 2000). 1a. The Wood…	1. We assume that carbon density in wood products is similar to that in the live tree, so that losses in wood volume provide rough estimates of carbon losses at each step 2. This system boundary excludes several less direct effects of wood harvesting activities, including the longer-term impacts of wood harvest on forest carbon, the impacts of wood fuels on fossil fuel consumption, and possible s…	N/A	25% with two-thirds of that in landfills	% of standing tree volume would remain in use or in landfills at 100 years	1. Biomass is often considered a “carbon-neutral” fuel, but its true climate impact depends upon management of the source forest and efficiency of use 2. Wood fuels clearly have much lower GHG emissions from processing and transport than fossil fuels, but their fossil-based emissions are not zero. Liquid 3. Wood has a lower hydrogen content than fossil fuels, which causes it to release more carbo…	N/A	N/A	N/A	1. Taking the entire life-cycle of these products into account, it becomes clear that an increased use of wood fuels and lumber will have very little net effect on climate change. To the contrary, the impact is as likely to be negative as positive. 2. Our nation must transform an economy based on centuries of inexpensive fossil energy into one that will operate on a truly sustainable, renewable b…	1. EMISSIONS FROM EACH PHASE 1a. HARVEST: A CORRIM study (Johnson et al. 2005) found emissions from fossil fuels used in harvest, replanting, and fertilization—plus methane and nitrous oxide (N2O, a greenhouse gas more than 300 times more potent then CO2)—of about 0.9%* to 1.3%* of CO2e in the raw log. 1b. PRIMARY PROCESSING: CORRIM studies found fossil fuel-related emissions for processing of fo…	N/A
12	Liu	Long-term forest management and timely transfer of carbon into wood products help reduce atmospheric carbon	2009	Harvest carbon store modeling	1. This paper focuses on the sustainable carbon storage contributions of a forest over the long term. This paper explains that long-term carbon storage and reduced carbon fluctuation can be achieved by a combination of improved forest management and efficient transfer of carbon into wood products. Here we show how three different forest management scenarios affect the overall carbon storage capac…	Sustainable Industrial	N/A	Northern British Columbia; Prince George Forest District, a 3.4-million-ha landbase in northern British Columbia	N/A	No	N/A	roots, stem, crown, litter + wood products	1. Forest carbon includes the carbon in trees and roots, and forest litter and soil. Carbon stored in wood products is assumed to release when their lifespans end	N/A	N/A	N/A	N/A	N/A	N/A	Carbon storage - High-harvest scenario—harvest 4.8 millionm3/year for 10 years;andthen 3.3 millionm3/year for the rest of planning hori- zon. Planning horizon=400 years. (The harvest is particularly high for the first 10 years due to the need to remove large quan- tities of timber that has been attacked by mountain pine beetle during last 10 years.)	N/A	100 years	N/A	N/A	Not used	1. wood is used as building material (Fig. 2,which assumes the carbon stays in the building for 100 years)	N/A	N/A	N/A	Negative	N/A	100 years	N/A	N/A	N/A	1. The high harvest scenario stores more carbon than the no-harvest scenariobecauseofthestablecarbonstockandtheaccu- mulated carbon in the wood products (Fig. 6). In the no-harvest scenario natural disturbance regenerates the forest only and there- fore the carbon stock is not stable.	560 million tonnes C stored in forest + wood products	N/A	N/A	N/A	N/A	N/A	N/A	1. Our results tell us that forest management practices that maintain and increase forest area, reduce natural disturbances in the forest, improve forest conditions, and ensure the appropriate and timely transfer of carbon into wood products lead to increasing overall carbon storage, thereby reducing carbon in the atmosphere. 2. Ideally, the stands should be harvested after the stands reachMAI ag…	N/A	N/A
12	Liu	Long-term forest management and timely transfer of carbon into wood products help reduce atmospheric carbon	2009	Harvest carbon store modeling	1. This paper focuses on the sustainable carbon storage contributions of a forest over the long term. This paper explains that long-term carbon storage and reduced carbon fluctuation can be achieved by a combination of improved forest management and efficient transfer of carbon into wood products. Here we show how three different forest management scenarios affect the overall carbon storage capac…	Sustainable Industrial	N/A	Northern British Columbia; Prince George Forest District, a 3.4-million-ha landbase in northern British Columbia	N/A	No	N/A	roots, stem, crown, litter + wood products	1. Forest carbon includes the carbon in trees and roots, and forest litter and soil. Carbon stored in wood products is assumed to release when their lifespans end	N/A	N/A	N/A	N/A	N/A	N/A	Carbon storage - Low-harvest scenario—harvest 1.8 millionm3/year for the entire 400-year planning horizon.	N/A	100 years	N/A	N/A	Not used	1. wood is used as building material (Fig. 2,which assumes the carbon stays in the building for 100 years)	N/A	N/A	N/A	Negative	N/A	100 years	N/A	N/A	N/A	1. The high harvest scenario stores more carbon than the no-harvest scenariobecauseofthestablecarbonstockandtheaccu- mulated carbon in the wood products (Fig. 6). In the no-harvest scenario natural disturbance regenerates the forest only and there- fore the carbon stock is not stable.	545 million tonnes C stored in forest + wood products	N/A	N/A	N/A	N/A	N/A	N/A	1. Our results tell us that forest management practices that maintain and increase forest area, reduce natural disturbances in the forest, improve forest conditions, and ensure the appropriate and timely transfer of carbon into wood products lead to increasing overall carbon storage, thereby reducing carbon in the atmosphere. 2. Ideally, the stands should be harvested after the stands reachMAI ag…	N/A	N/A
[truncated: 33 more rows]

## Sheet: Summary Table
				INCLUSION CATEGORIES						OUTCOMES
	Publication	Paper Objective	Geographic Region	Soil carbon pool	Wood product pool	Long-lived wood product life span assumption (years)	Product substitution	Fuel displacement	Leakage	Carbon Carry Over (%)	Perceived Management Approach
	Harmon (2018, personal communication)	Carbon store modeling	Oregon, USA	No	Yes	50	5No	5No	No	23.2	N/A
	CONSERVE
[truncated: 29 more rows]

## Sheet: Dropdown List Categories
	Management View?			Was this an LCA?		Paper Objective_Short			Carbon pools analyzed_Short				LCA Type		Extending harvest rotations_Short		Study Scenario(s)_Short
[truncated: 14 more rows]
